# Supplementary material for: Divergent synthesis of carbamates and N-methyl carbamates from dimethyl carbonate and nitroarenes with Mo(CO)6 as a multiple promoter
Source: Royal Society of Chemistry journal article supplement (doi:10.1039/d3cc06257k), 2024-01-01

## Supporting Information

### Divergent Synthesis of Carbamates and *N*-Methyl Carbamates from Dimethyl Carbonate and Nitroarenes with Mo(CO)<sub>6</sub> as a Multiple Promoter

Tongshun An, Chenwei Liu, Weiheng Yuan, Xiaowen Qin, Zhiping Yin\*

<sup>a</sup> School of Pharmacy, Jiangsu University, Zhenjiang 212013, P. R. China,

E-mail: [zhiping\\_yin@ujs.edu.cn](mailto:zhiping_yin@ujs.edu.cn)

|                                                            |    |
|------------------------------------------------------------|----|
| 1. General Comments.....                                   | 2  |
| 2. Experimental Setup.....                                 | 2  |
| 2.1 Screening of DMC solvent amount.....                   | 2  |
| 2.2 Failed examples .....                                  | 3  |
| 2.3 General process of nitrobenzene reaction with DMC..... | 3  |
| 2.4 Investigation of ethyl methyl carbonate.....           | 4  |
| 2.5 Competing experiment.....                              | 5  |
| 3. Analytical Data .....                                   | 6  |
| 4. References.....                                         | 15 |
| 5. NMR Spectroscopic Data for Products.....                | 16 |

## 1. General Comments

Chemicals were purchased from Adamas, Bidepharm., TCI, Aladdin and used as such unless stated otherwise. All solvents like dimethyl carbonate were purchased from Adamas (Water  $\leq$  30 ppm (by K.F.), 99.9%, SafeDry, with molecular sieves, Safeseal). NMR spectra were recorded on Bruker AV 400 or Bruker Fourier 300 spectrometer. Chemical shifts (ppm) are given relative to TMS (0.00 ppm) for  $^1\text{H}$  and  $\text{CDCl}_3$  (77.0 ppm) for  $^{13}\text{C}$  solvent. Multiplets were assigned as s (singlet), d (doublet), t (triplet), q (quartet), p (pentet), dd (doublet of doublet), m (multiplet) and br.s (broad singlet). High-resolution mass spectra HRMS spectra were recorded on a Thermo Scientific Exactive Orbitrap Mass Spectrometer under Electron Spray Ionization conditions preparing sample solution in methanol. The data are given as mass units per charge (m/z). GC yields were calculated using hexadecane as an internal standard. Gas chromatography analysis was performed on an Agilent 6820 instrument with an FID detector and HP-5 capillary column (polydimethylsiloxane with 5% phenyl groups, 30 m, 0.32 mm i.d. 0.25  $\mu\text{m}$  film thickness) using nitrogen as carrier gas. The products were isolated from the reaction mixture by column chromatography on silica gel., 54-74  $\mu\text{m}$ , 200-300 mesh (Yucheng Chemical CO., LTD, Shanghai).

**NOTE:** a) As carbon monoxide will be released from  $\text{Mo}(\text{CO})_6$ , the reactions should only be handled in a well-ventilated fume hood and the laboratory should be well-equipped with a CO detector and alarm system; b) The reaction was conducted under reflux conditions (temperature is higher than the boiling point of DMC).

## 2. Experimental Setup

### 2.1 Screening of DMC solvent amount <sup>a</sup>

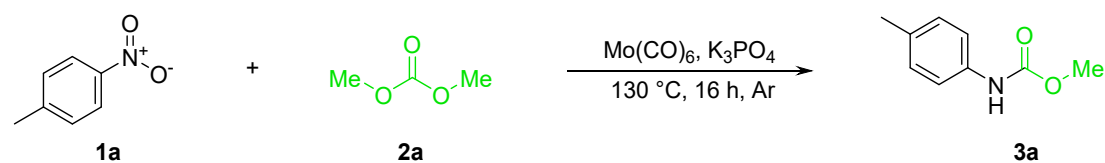

| entry | Volume (mL) | yield (%) |
|-------|-------------|-----------|
| 1     | 0.625       | 82        |
| 2     | 0.7         | 88        |
| 3     | 0.75        | 94        |
| 4     | 0.8         | 90        |
| 5     | 0.875       | 79        |

6

0.75

38

(Reaction conditions: **1a** (0.30 mmol, 1 equiv.), **2a** (x ml), K<sub>3</sub>PO<sub>4</sub> (0.75 mmol, 2.5 equiv.), Mo(CO)<sub>6</sub> (0.3 mmol, 1 equiv), 130 °C, 16 h, under Ar, GC yields were determined by using hexadecane as the internal standard; <sup>b</sup> 1.5 equiv. K<sub>3</sub>PO<sub>4</sub>)

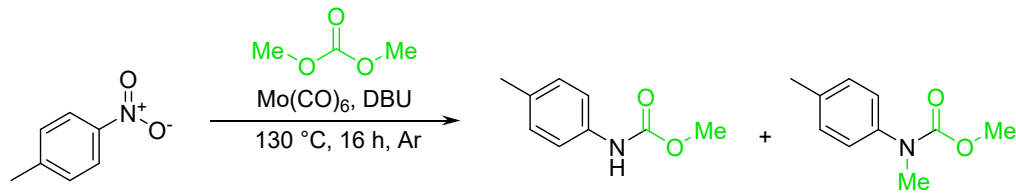

| entry | Volume <b>2a</b> (mL) | Yield <b>3a</b> (%) | Yield <b>4a</b> (%) |
|-------|-----------------------|---------------------|---------------------|
| 1     | 0.25                  | 0                   | 83                  |
| 2     | 0.5                   | 0                   | 90                  |
| 3     | 0.75                  | 0                   | 85                  |
| 4     | 1                     | 19                  | 76                  |
| 5     | 0.5                   | 0                   | 84                  |

(Reaction conditions: **1a** (0.30 mmol, 1 equiv.), **2a** (x mL), DBU (0.75 mmol, 2.5 equiv.), Mo(CO)<sub>6</sub> (0.3 mmol, 1 equiv), 130 °C, 16 h, under Ar, GC yields; <sup>b</sup> 1.5 equiv. DBU)

## 2.2 Failed examples

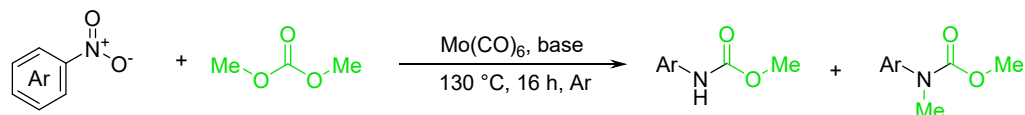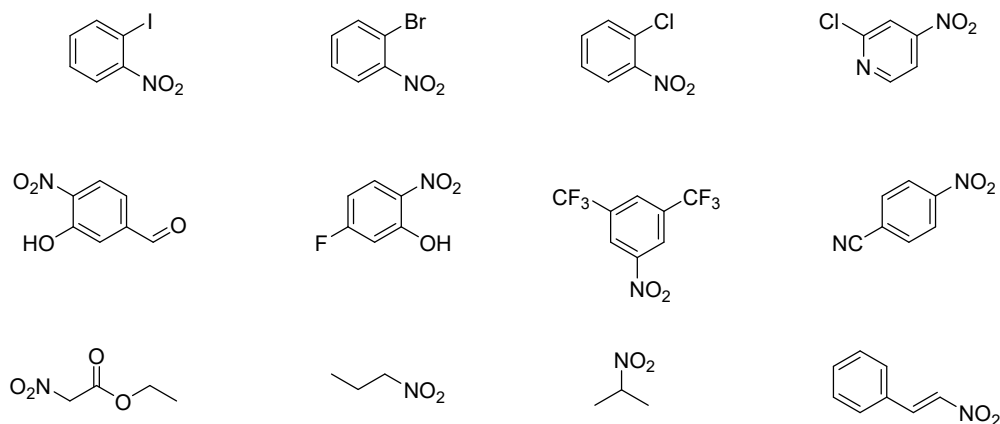

### 2.3 General process of nitrobenzene reaction with DMC

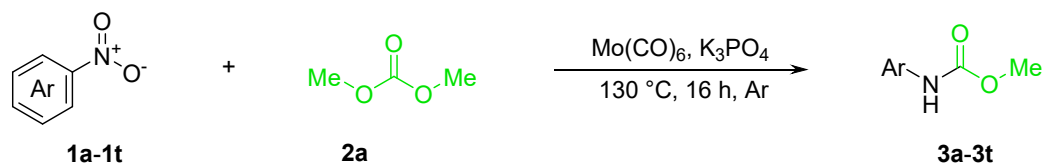

A flame-dried resealable Schlenk tube (10 mL) was added with aromatic nitro compounds **1a-1t** (0.3 mmol), Mo(CO)<sub>6</sub> (79.2 mg, 1 equivalent, 0.3 mmol) and K<sub>3</sub>PO<sub>4</sub> (0.75 mmol, 2.5 equiv.). The Schlenk tube was capped with a rubber septum, evacuated, and backfilled with argon three times. The liquid **2a** (0.75 mL) were added through the septum, then the septum was replaced with a Teflon screwcap quickly. The Schlenk tube was put into an aluminum heating block and stirred at 130 °C for 16 hours. After the reaction was completed, the reaction mixture was cooled to room temperature, diluted with ethyl acetate, and concentrated in vacuo. The crude material was purified by column chromatography on silica gel (eluent: PE and EA) to give the target product **3a-3t**.

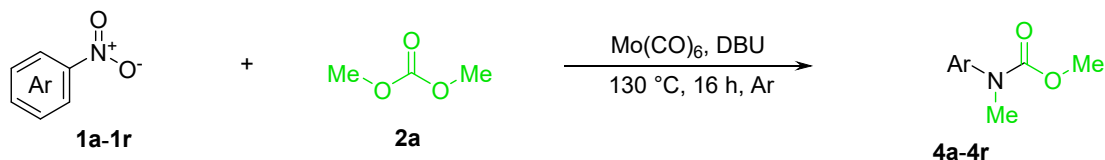

A flame-dried resealable Schlenk tube (10 mL) was added with aromatic nitro compounds **1a-1r** (0.3 mmol), Mo(CO)<sub>6</sub> (79.2 mg, 1 equivalent, 0.3 mmol) and DBU (0.75 mmol, 2.5 equiv.). The Schlenk tube was capped with a rubber septum, evacuated, and backfilled with argon three times. The liquid **2a** (0.5 mL) were added through the septum, then the septum was replaced with a Teflon screwcap quickly. The Schlenk tube was put into an aluminum heating block and stirred at 130 °C for 16 hours. After the reaction was completed, the reaction mixture was cooled to room temperature, diluted with ethyl acetate, and concentrated in vacuo. The crude material was purified by column chromatography on silica gel (eluent: PE and EA) to give the target product **4a-4r**.

### 2.4 Investigation of ethyl methyl carbonate

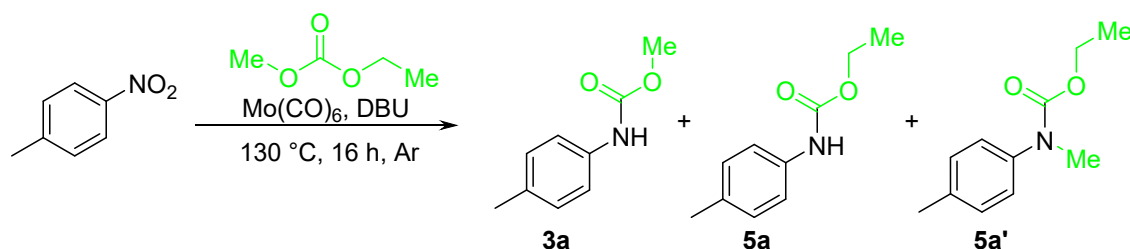

A flame-dried resealable Schlenk tube (10 mL) was added with aromatic nitro compounds **1a** (0.3 mmol), Mo(CO)<sub>6</sub> (79.2 mg, 1 equivalent, 0.3 mmol) and DBU (0.75 mmol, 2.5 equiv.). The Schlenk tube was capped with a rubber septum, evacuated, and backfilled with argon three times. The liquid ethyl methyl carbonate (0.5 mL) were added through the septum, then the septum was replaced with a Teflon screwcap

quickly. The Schlenk tube was put into an aluminum heating block and stirred at 130 °C for 16 hours. After the reaction was completed, the reaction mixture was analyzed by GC-MS.

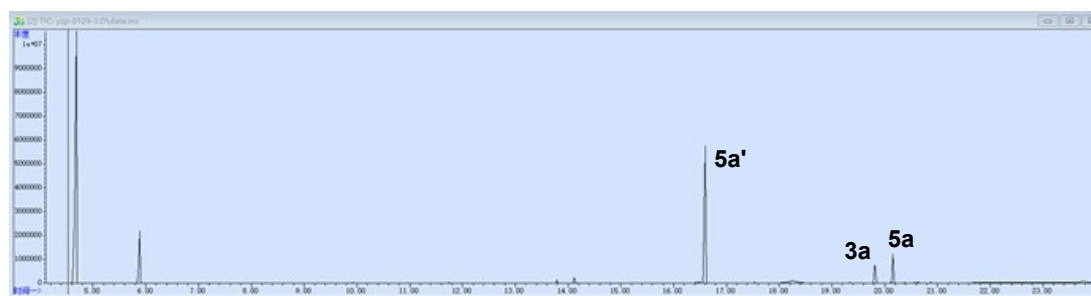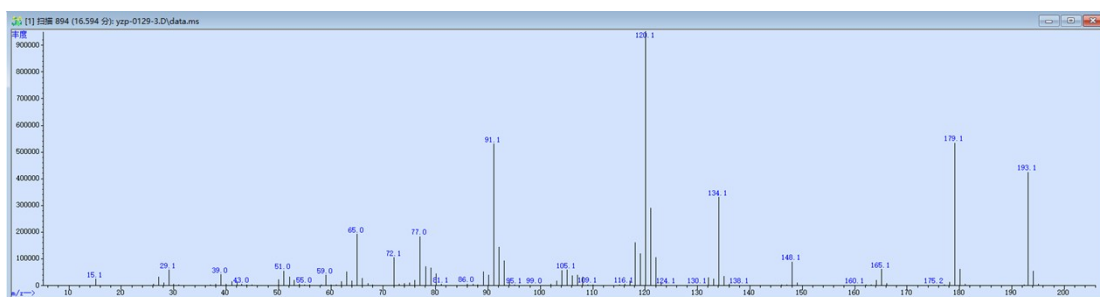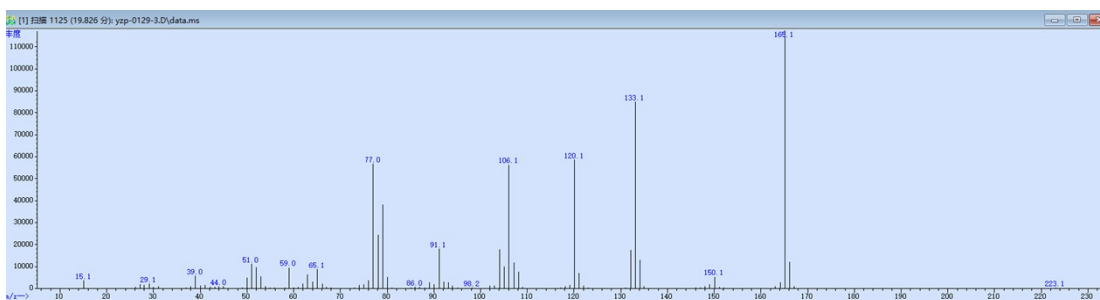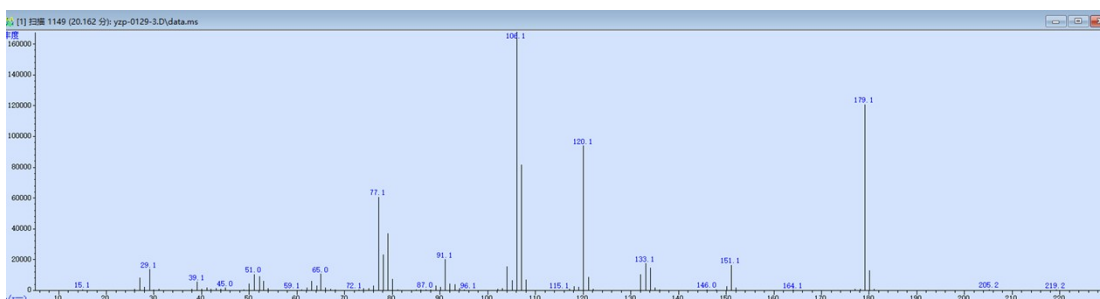

## 2.5 Competing experiment

g) competing experiment

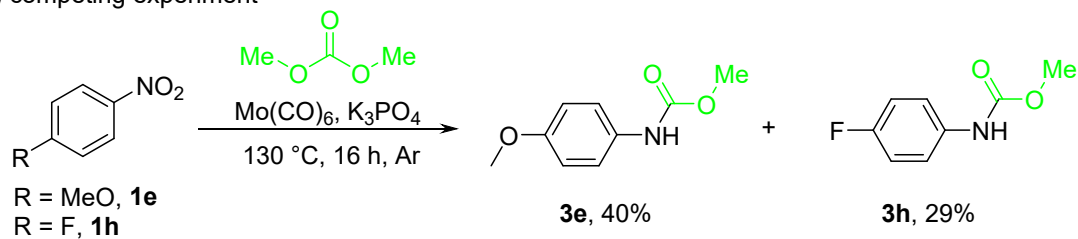

A flame-dried resealable Schlenk tube (10 mL) was added with aromatic nitro compounds **1e** (0.3 mmol)

and **1h** (0.3 mmol), Mo(CO)<sub>6</sub> (79.2 mg, 1 equivalent, 0.3 mmol) and K<sub>3</sub>PO<sub>4</sub> (0.75 mmol, 2.5 equiv.). The Schlenk tube was capped with a rubber septum, evacuated, and backfilled with argon three times. The liquid **2a** (0.5 mL) were added through the septum, then the septum was replaced with a Teflon screwcap quickly. The Schlenk tube was put into an aluminum heating block and stirred at 130 °C for 16 hours. After the reaction was completed, the reaction mixture was cooled to room temperature, diluted with ethyl acetate, and concentrated in vacuo. The crude material was purified by column chromatography on silica gel (eluent: PE and EA) to give the target product **3e** (26 mg, 40%) and **3h** (15 mg, 29% yield).

### 3. Analytical Data

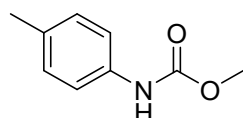

**Methyl p-tolyl carbamate (3a):** (47 mg, white solid, melting point: 90-91, yield: 94%)

<sup>1</sup>H NMR (400 MHz, CDCl<sub>3</sub>) δ 7.26 (d, *J* = 8.1 Hz, 2H), 7.10 (d, *J* = 8.3 Hz, 2H), 6.68 (s, 1H), 3.76 (s, 3H), 2.30 (s, 3H).

<sup>13</sup>C NMR (101 MHz, CDCl<sub>3</sub>) δ 154.34, 135.35, 133.13, 129.62, 118.92, 52.37, 20.84.

The analytical data are consistent with those reported in the literature.<sup>1</sup>

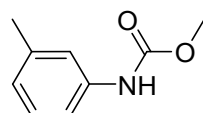

**Methyl m-tolyl carbamate (3b):** (45 mg, white solid, melting point: 61-62, yield: 91%)

<sup>1</sup>H NMR (400 MHz, CDCl<sub>3</sub>) δ 7.18 (td, *J* = 12.2, 10.9, 6.9 Hz, 3H), 6.94 – 6.78 (m, 1H), 6.57 (s, 1H), 3.77 (s, 3H), 2.33 (s, 3H).

<sup>13</sup>C NMR (101 MHz, CDCl<sub>3</sub>) δ 154.21, 139.13, 137.88, 129.00, 124.45, 119.53, 115.98, 52.42, 21.60.

The analytical data are consistent with those reported in the literature.<sup>2</sup>

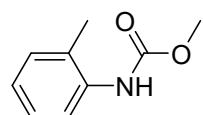

**Methyl o-tolyl carbamate (3c):** (46 mg, white solid, melting point: 57-58, yield: 93%)

<sup>1</sup>H NMR (400 MHz, CDCl<sub>3</sub>) δ 7.78 (s, 1H), 7.29 – 7.19 (m, 1H), 7.22 – 7.13 (m, 1H), 7.08 – 7.00 (m, 1H), 6.45 (s, 1H), 3.78 (s, 1H), 2.25 (s, 1H).

<sup>13</sup>C NMR (101 MHz, CDCl<sub>3</sub>) δ 154.52, 135.90, 130.51, 126.98, 124.35, 121.28, 52.52, 17.75.

The analytical data are consistent with those reported in the literature.<sup>2</sup>

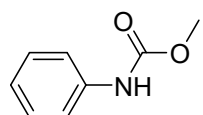

**Methyl phenyl carbamate (3d):** (39 mg, brown liquid, yield: 87%)

<sup>1</sup>H NMR (400 MHz, CDCl<sub>3</sub>) δ 7.53 – 7.27 (m, 4H), 7.18 – 7.03 (m, 1H), 6.87 – 6.67 (m, 1H), 3.77 (d, *J* = 1.7 Hz, 3H).

<sup>13</sup>C NMR (101 MHz, CDCl<sub>3</sub>) δ 154.20, 137.98, 129.17, 123.60, 118.87, 52.45.

The analytical data are consistent with those reported in the literature.<sup>1</sup>

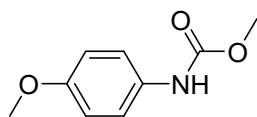

**Methyl (4-methoxyphenyl) carbamate (3e):** (50 mg, white solid, melting point: 71-72, yield: 93%)

**(3t):** (50 mg, white solid, yield: 93%)

<sup>1</sup>H NMR (400 MHz, CDCl<sub>3</sub>) δ 6.87 – 6.81 (m, 2H), 6.68 (s, 1H), 3.76 (d, *J* = 10.0 Hz, 6H).

<sup>13</sup>C NMR (101 MHz, CDCl<sub>3</sub>) δ 156.13, 154.61, 131.03, 120.86, 114.35, 55.60, 52.38.

The analytical data are consistent with those reported in the literature.<sup>1</sup>

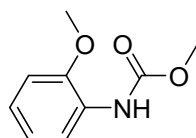

**Methyl (2-methoxyphenyl) carbamate (3f):** (51 mg, brown liquid, yield: 94%)

<sup>1</sup>H NMR (400 MHz, CDCl<sub>3</sub>) δ 8.17 – 8.01 (m, 1H), 7.07 – 6.92 (m, 2H), 6.85 (dd, *J* = 7.6, 1.9 Hz, 1H), 3.85 (s, 3H), 3.78 (s, 3H).

<sup>13</sup>C NMR (101 MHz, CDCl<sub>3</sub>) δ 154.10, 147.69, 127.72, 122.88, 121.24, 118.28, 110.09, 55.77, 52.38.

The analytical data are consistent with those reported in the literature.<sup>1</sup>

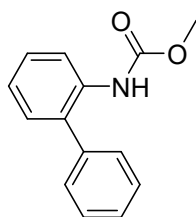

**Methyl [1,1'-biphenyl]-2-ylcarbamate (3g):** (61 mg, white solid, melting point: 180-182, yield: 90%)

<sup>1</sup>H NMR (400 MHz, CDCl<sub>3</sub>) δ 8.11 (dd, *J* = 21.7, 7.8 Hz, 1H), 7.52 – 7.45 (m, 2H), 7.44 – 7.40 (m, 1H), 7.40 – 7.34 (m, 3H), 7.22 (dd, *J* = 7.6, 1.7 Hz, 1H), 7.13 (td, *J* = 7.5, 1.2 Hz, 1H), 6.66 (s, 1H), 3.72 (s, 3H).

<sup>13</sup>C NMR (101 MHz, CDCl<sub>3</sub>) δ 154.12, 138.22, 134.96, 131.62, 130.27, 129.40, 129.26, 128.63, 128.07, 123.49, 119.70, 52.40.

The analytical data are consistent with those reported in the literature.<sup>2</sup>

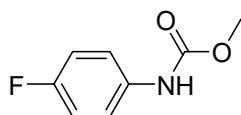

**Methyl (4-fluorophenyl) carbamate (3h):** (47 mg, brown solid, melting point: 78-79, yield: 93%)

<sup>1</sup>H NMR (400 MHz, CDCl<sub>3</sub>) δ 7.33 (dd, *J* = 9.1, 4.7 Hz, 2H), 6.99 (t, *J* = 8.7 Hz, 2H), 6.70 (s, 1H), 3.76 (s, 3H).

<sup>13</sup>C NMR (101 MHz, CDCl<sub>3</sub>) δ 159.15 (d, *J*<sub>C-F</sub> = 243.41 Hz), 154.38, 133.94, 120.63, 115.79 (d, *J*<sub>C-F</sub> = 23.23 Hz), 52.54.

The analytical data are consistent with those reported in the literature.<sup>1</sup>

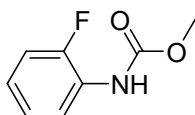

**Methyl (2-fluorophenyl) carbamate (3i):** (45 mg, colorless liquid, yield: 89%)

$^1\text{H NMR}$  (400 MHz,  $\text{CDCl}_3$ )  $\delta$  8.09 (s, 1H), 7.20 – 6.93 (m, 3H), 6.87 (s, 1H), 3.80 (s, 3H).

$^{13}\text{C NMR}$  (101 MHz,  $\text{CDCl}_3$ )  $\delta$  153.87, 152.30 (d,  $J_{\text{C-F}} = 243.41$  Hz), 126.53 (d,  $J_{\text{C-F}} = 9.09$  Hz), 124.75, 123.55 (d,  $J_{\text{C-F}} = 8.08$  Hz), 120.36, 114.96 (d,  $J_{\text{C-F}} = 19.19$  Hz), 52.69.

The analytical data are consistent with those reported in the literature.<sup>2</sup>

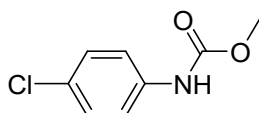

**Methyl (4-chlorophenyl) carbamate (3j):** (72 mg, white solid, melting point: 107-108, yield: 97%)

$^1\text{H NMR}$  (400 MHz,  $\text{CDCl}_3$ )  $\delta$  7.46 – 7.21 (m, 4H), 6.76 (s, 1H), 3.76 (s, 3H).

$^{13}\text{C NMR}$  (101 MHz,  $\text{CDCl}_3$ )  $\delta$  154.09, 136.59, 129.15, 128.58, 120.06, 52.60.

The analytical data are consistent with those reported in the literature.<sup>1</sup>

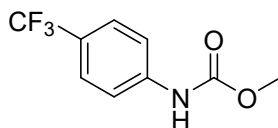

**Methyl (4-(trifluoromethyl) phenyl) carbamate (3k):** (52.5 mg, white solid, melting point: 118-120, yield: 80%)

$^1\text{H NMR}$  (400 MHz,  $\text{CDCl}_3$ )  $\delta$  7.56 (d,  $J = 8.6$  Hz, 2H), 7.50 (d,  $J = 8.6$  Hz, 2H), 6.77 (s, 1H), 3.80 (s, 3H).

$^{13}\text{C NMR}$  (101 MHz,  $\text{CDCl}_3$ )  $\delta$  153.83, 141.12, 126.50, 125.58 (d,  $J_{\text{C-F}} = 8.08$  Hz), 124.08 (q,  $J_{\text{C-F}} = 231.29$  Hz), 118.20, 52.76.

The analytical data are consistent with those reported in the literature.<sup>2</sup>

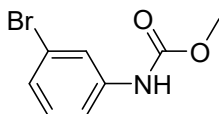

**Methyl (3-bromophenyl) carbamate (3l):** (65 mg, white solid, melting point: 82-83, yield: 95%)

$^1\text{H NMR}$  (400 MHz,  $\text{CDCl}_3$ )  $\delta$  7.64 (s, 1H), 7.28 (dt,  $J = 7.6, 1.8$  Hz, 1H), 7.19 – 7.08 (m, 2H), 6.80 (s, 1H), 3.77 (s, 3H).

$^{13}\text{C NMR}$  (101 MHz,  $\text{CDCl}_3$ )  $\delta$  153.95, 139.32, 130.42, 126.54, 122.84, 121.72, 117.27, 52.65.

The analytical data are consistent with those reported in the literature.<sup>5</sup>

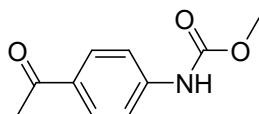

**Methyl (4-acetylphenyl) carbamate (3m):** (33 mg, yellow solid, melting point: 155-156, yield: 57%)

$^1\text{H NMR}$  (400 MHz,  $\text{CDCl}_3$ )  $\delta$  7.93 (d,  $J = 8.8$  Hz, 2H), 7.48 (d,  $J = 8.8$  Hz, 2H), 6.89 (s, 1H), 3.80 (s,



3H), 2.57 (s, 3H).

$^{13}\text{C}$  NMR (101 MHz,  $\text{CDCl}_3$ )  $\delta$  197.01, 153.66, 142.46, 132.42, 130.04, 117.75, 52.78, 26.53.

The analytical data are consistent with those reported in the literature.<sup>5</sup>

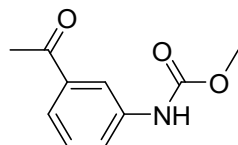

**Methyl (3-acetylphenyl) carbamate (3n):** (19 mg, yellow solid, melting point: 93-94, yield: 32%)

$^1\text{H}$  NMR (400 MHz,  $\text{CDCl}_3$ )  $\delta$  7.92 (s, 1H), 7.67 (dd,  $J$  = 17.3, 7.9 Hz, 2H), 7.41 (dt,  $J$  = 7.7, 4.0 Hz, 1H), 6.98 – 6.64 (m, 1H), 3.80 (s, 3H), 2.60 (s, 3H).

$^{13}\text{C}$  NMR (101 MHz,  $\text{CDCl}_3$ )  $\delta$  197.95, 154.10, 138.52, 138.06, 129.53, 123.51, 118.32, 52.66, 26.82.

The analytical data are consistent with those reported in the literature.<sup>4</sup>

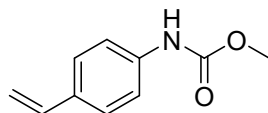

**Methyl (4-vinylphenyl) carbamate (3o):** (34 mg, white solid, melting point: 96-97, yield: 64%)

$^1\text{H}$  NMR (400 MHz,  $\text{CDCl}_3$ )  $\delta$  7.35 (s, 4H), 6.78 (s, 1H), 6.66 (dd,  $J$  = 17.6, 10.9 Hz, 1H), 5.67 (dd,  $J$  = 17.6, 0.9 Hz, 1H), 5.18 (dd,  $J$  = 10.9, 0.9 Hz, 1H), 3.77 (s, 3H).

$^{13}\text{C}$  NMR (101 MHz,  $\text{CDCl}_3$ )  $\delta$  154.11, 137.54, 136.23, 133.10, 127.02, 118.79, 112.81, 52.48.

The analytical data are consistent with those reported in the literature.<sup>6</sup>

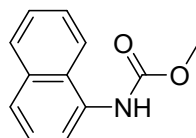

**Methyl naphthalen-1-yl carbamate (3p):** (52 mg, white solid, melting point: 115-116, yield: 87%)

$^1\text{H}$  NMR (400 MHz,  $\text{CDCl}_3$ )  $\delta$  7.99 – 7.77 (m, 3H), 7.68 (d,  $J$  = 8.2 Hz, 1H), 7.58 – 7.43 (m, 3H), 6.96 (s, 1H), 3.83 (s, 3H).

$^{13}\text{C}$  NMR (101 MHz,  $\text{CDCl}_3$ )  $\delta$  155.08, 134.18, 132.56, 128.85, 126.88, 126.39, 126.14, 125.92, 125.27, 120.59, 119.40, 52.74.

The analytical data are consistent with those reported in the literature.<sup>11</sup>

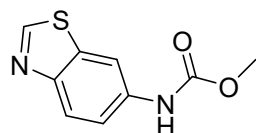

**Methyl benzo[d]thiazol-6-yl carbamate (3q):** (51 mg, yellow solid, melting point: 77-78, yield: 81%)

$^1\text{H}$  NMR (400 MHz,  $\text{CDCl}_3$ )  $\delta$  8.89 (s, 1H), 8.30 (s, 1H), 8.02 (d,  $J$  = 8.8 Hz, 1H), 7.28 (dd,  $J$  = 8.8, 2.3 Hz, 1H), 6.92 (s, 1H), 3.81 (s, 3H).

$^{13}\text{C}$  NMR (101 MHz,  $\text{CDCl}_3$ )  $\delta$  154.18, 153.11, 149.66, 135.91, 135.13, 123.78, 118.40, 111.18, 52.69.

HRMS (ESI-TOF) Calc. for  $\text{C}_9\text{H}_9\text{N}_2\text{O}_2\text{S}^+$   $[\text{M}+\text{H}]^+$ : 209.0379; found: 209.0379.

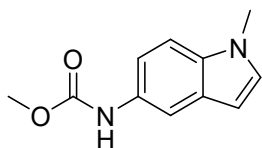

**Methyl (1-methyl-1H-indol-5-yl) carbamate (3r):** (28 mg, yellow solid, melting point: 148-149, yield: 46%)

<sup>1</sup>H NMR (400 MHz, CDCl<sub>3</sub>) δ 8.06 (d, *J* = 8.5 Hz, 1H), 7.73 (s, 1H), 7.57 (d, *J* = 3.7 Hz, 1H), 7.18 (dd, *J* = 8.9, 2.2 Hz, 1H), 6.79 (s, 1H), 6.53 (d, *J* = 3.7 Hz, 1H), 4.02 (s, 3H), 3.78 (s, 3H).

<sup>13</sup>C NMR (101 MHz, CDCl<sub>3</sub>) δ 154.52, 151.49, 133.43, 131.06, 126.36, 116.59, 115.37, 111.11, 108.27, 53.92, 52.43.

HRMS (ESI-TOF) Calc. for C<sub>11</sub>H<sub>12</sub>NaN<sub>2</sub>O<sub>2</sub><sup>+</sup> [M+Na]<sup>+</sup>: 227.0791; found: 227.0795.

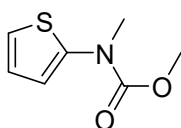

**Methyl methyl(thiophen-2-yl) carbamate (3s):** (21 mg, brown liquid, yield: 84%)

**(4n):** (19 mg, brown solid, yield: 27%)

<sup>1</sup>H NMR (400 MHz, CDCl<sub>3</sub>) δ 6.99 – 6.82 (m, 2H), 6.59 (s, 1H), 3.82 (s, 3H), 3.39 (s, 3H).

<sup>13</sup>C NMR (101 MHz, CDCl<sub>3</sub>) δ 145.44, 127.10, 124.31, 121.35, 112.03, 53.57, 14.22.

HRMS (ESI-TOF) Calc. for C<sub>7</sub>H<sub>10</sub>NO<sub>2</sub>S<sup>+</sup> [M+H]<sup>+</sup>: 172.0427; found: 172.0427.

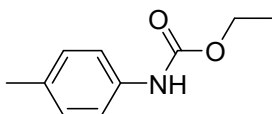

**Ethyl p-tolyl carbamate (5a):** (K<sub>3</sub>PO<sub>4</sub>, 29 mg, yellow solid, melting point: 48-49, yield: 54%); (DBU, 15 mg, yellow solid, yield: 27%)

<sup>1</sup>H NMR (400 MHz, CDCl<sub>3</sub>) δ 7.26 (d, *J* = 8.3 Hz, 2H), 7.10 (d, *J* = 8.3 Hz, 2H), 6.55 (s, 1H), 4.21 (q, *J* = 7.1 Hz, 2H), 2.30 (s, 3H), 1.30 (t, *J* = 7.1 Hz, 3H).

<sup>13</sup>C NMR (101 MHz, CDCl<sub>3</sub>) δ 153.89, 135.50, 133.08, 129.66, 118.98, 61.26, 20.86, 14.71.

The analytical data are consistent with those reported in the literature.<sup>3</sup>

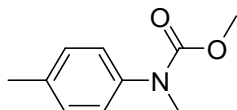

**Methyl methyl(p-tolyl) carbamate (4a):** (48 mg, yellow liquid, yield: 90%)

<sup>1</sup>H NMR (400 MHz, CDCl<sub>3</sub>) δ 7.21 – 7.02 (m, 4H), 3.69 (s, 3H), 3.27 (s, 3H), 2.34 (s, 3H).

<sup>13</sup>C NMR (101 MHz, CDCl<sub>3</sub>) δ 156.42, 140.82, 136.15, 129.66, 125.82, 53.00, 38.06, 21.09.

GC-MS (EI, 70ev): *m/z* (%) = 179 ([M]<sup>+</sup>, 100), 143 (10), 134 (28), 120(66), 91 (55), 72 (40), 39 (5).

HRMS (ESI-TOF) Calc. for C<sub>10</sub>H<sub>14</sub>NO<sub>2</sub><sup>+</sup> [M+H]<sup>+</sup>: 180.1019; found: 180.1026.

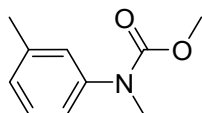

**Methyl methyl(m-tolyl) carbamate (4b):** (52 mg, white liquid, yield: 99%)

$^1\text{H NMR}$  (400 MHz,  $\text{CDCl}_3$ )  $\delta$  7.24 (s, 1H), 7.04 (d,  $J = 6.6$  Hz, 3H), 3.70 (s, 3H), 3.28 (s, 3H), 2.35 (s, 3H).

$^{13}\text{C NMR}$  (101 MHz,  $\text{CDCl}_3$ )  $\delta$  156.35, 143.29, 138.93, 128.81, 127.16, 126.63, 122.99, 53.00, 37.99, 21.45.

HRMS (ESI-TOF) Calc. for  $\text{C}_{10}\text{H}_{14}\text{NO}_2^+$   $[\text{M}+\text{H}]^+$ : 180.1019; found: 180.1026.

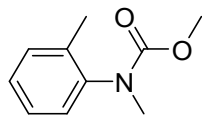

**Methyl methyl(o-tolyl) carbamate (4c):** (47 mg, white liquid, yield: 88%)

$^1\text{H NMR}$  (400 MHz,  $\text{CDCl}_3$ )  $\delta$  7.25 – 7.17 (m, 3H), 7.10 (dd,  $J = 5.4, 3.6$  Hz, 1H), 3.63 (s, 3H), 3.20 (s, 3H), 2.20 (s, 3H).

$^{13}\text{C NMR}$  (101 MHz,  $\text{CDCl}_3$ )  $\delta$  156.47, 141.76, 135.65, 130.98, 127.67, 127.42, 126.98, 53.02, 37.51, 17.45.

HRMS (ESI-TOF) Calc. for  $\text{C}_{10}\text{H}_{14}\text{NO}_2^+$   $[\text{M}+\text{H}]^+$ : 180.1019; found: 180.1026.

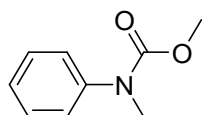

**Methyl methyl(phenyl) carbamate (4d):** (42 mg, yellow liquid, yield: 85%)

$^1\text{H NMR}$  (400 MHz,  $\text{CDCl}_3$ )  $\delta$  7.42 – 7.25 (m, 2H), 7.24 – 7.13 (m, 3H), 3.63 (s, 3H), 3.23 (s, 3H).

$^{13}\text{C NMR}$  (101 MHz,  $\text{CDCl}_3$ )  $\delta$  156.27, 143.36, 128.99, 126.25, 125.88, 53.01, 37.90.

The analytical data are consistent with those reported in the literature.<sup>8</sup>

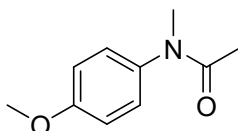

**Methyl 4-(N-methyl acetamido) phenyl carbonate (4e):** (23 mg, white liquid, yield: 53%)

**(4o):** (31 mg, white liquid, yield: 72%)

$^1\text{H NMR}$  (400 MHz,  $\text{CDCl}_3$ )  $\delta$  7.13 (d,  $J = 8.3$  Hz, 2H), 6.95 – 6.79 (m, 2H), 3.79 (s, 3H), 3.68 (s, 3H), 3.25 (s, 3H).

$^{13}\text{C NMR}$  (101 MHz,  $\text{CDCl}_3$ )  $\delta$  157.94, 156.56, 136.30, 127.30, 114.26, 55.52, 52.99, 38.28.

The analytical data are consistent with those reported in the literature.<sup>9</sup>

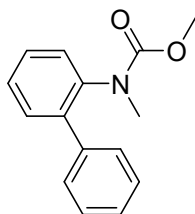

**Methyl [1,1'-biphenyl]-2-yl(methyl) carbamate (4f):** (46 mg, white liquid, yield: 64%)

$^1\text{H NMR}$  (400 MHz,  $\text{CDCl}_3$ )  $\delta$  7.44 – 7.40 (m, 2H), 7.40 – 7.38 (m, 2H), 7.36 (d,  $J = 3.1$  Hz, 2H), 7.31

– 7.27 (m, 2H), 7.25 (dd,  $J = 3.9, 2.6$  Hz, 1H), 3.50 (s, 3H), 2.98 (s, 3H).

$^{13}\text{C}$  NMR (101 MHz,  $\text{CDCl}_3$ )  $\delta$  156.32, 140.70, 139.82, 139.45, 130.96, 128.59, 128.42, 128.37, 128.19, 127.69, 127.51, 52.84, 37.91.

The analytical data are consistent with those reported in the literature.<sup>8</sup>

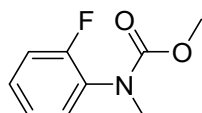

**Methyl (2-fluorophenyl) (methyl) carbamate (4g):** (29 mg, yellow liquid, yield: 52%)

$^1\text{H}$  NMR (400 MHz,  $\text{CDCl}_3$ )  $\delta$  7.32 – 7.14 (m, 2H), 7.13 – 6.98 (m, 2H), 3.62 (s, 3H), 3.18 (s, 3H).

$^{13}\text{C}$  NMR (101 MHz,  $\text{CDCl}_3$ )  $\delta$  159.29, 156.52 (d,  $J = 56.56$  Hz), 130.78, 129.11, 128.72 (d,  $J = 8.08$  Hz), 124.54, 116.61 (d,  $J = 20.20$  Hz), 53.24, 37.68.

$^{19}\text{F}$  NMR (376 MHz,  $\text{CDCl}_3$ )  $\delta$  -121.57.

HRMS (ESI-TOF) Calc. for  $\text{C}_9\text{H}_{11}\text{FNO}_2^+ [\text{M}+\text{H}]^+$ : 184.0768; found: 184.0776

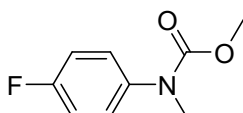

**Methyl (4-fluorophenyl) (methyl) carbamate (4h):** (34 mg, white liquid, yield: 62%)

$^1\text{H}$  NMR (400 MHz,  $\text{CDCl}_3$ )  $\delta$  7.19 (dd,  $J = 8.8, 4.8$  Hz, 2H), 7.03 (dd,  $J = 9.1, 8.1$  Hz, 2H), 3.69 (s, 3H), 3.27 (s, 3H).

$^{13}\text{C}$  NMR (101 MHz,  $\text{CDCl}_3$ )  $\delta$  160.82 (d,  $J = 245.43$  Hz), 156.30, 139.35, 127.71, 115.85 (d,  $J = 23.23$  Hz), 53.13, 38.11.

$^{19}\text{F}$  NMR (376 MHz,  $\text{CDCl}_3$ )  $\delta$  -115.55.

HRMS (ESI-TOF) Calc. for  $\text{C}_9\text{H}_{11}\text{FNO}_2^+ [\text{M}+\text{H}]^+$ : 184.0768; found: 184.0776

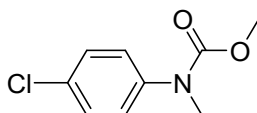

**Methyl (4-chlorophenyl) (methyl) carbamate (4i):** (47 mg, white liquid, yield: 78%)

$^1\text{H}$  NMR (400 MHz,  $\text{CDCl}_3$ )  $\delta$  7.32 (s, 1H), 7.30 (d,  $J = 2.1$  Hz, 1H), 7.17 (d,  $J = 8.7$  Hz, 2H), 3.71 (s, 3H), 3.28 (s, 3H).

$^{13}\text{C}$  NMR (101 MHz,  $\text{CDCl}_3$ )  $\delta$  156.08, 141.93, 131.69, 129.11, 127.11, 53.16, 37.81.

The analytical data are consistent with those reported in the literature.<sup>10</sup>

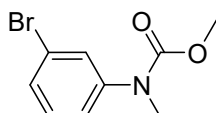

**Methyl (3-bromophenyl) (methyl) carbamate (4j):** (53 mg, white liquid, yield: 73%)

$^1\text{H}$  NMR (400 MHz,  $\text{CDCl}_3$ )  $\delta$  7.41 (t,  $J = 2.0$  Hz, 1H), 7.34 (dt,  $J = 7.3, 1.9$  Hz, 1H), 7.24 – 7.16 (m, 2H), 3.72 (s, 3H), 3.28 (s, 3H).

$^{13}\text{C}$  NMR (101 MHz,  $\text{CDCl}_3$ )  $\delta$  155.94, 144.64, 130.18, 129.22, 128.94, 124.41, 122.26, 53.22, 37.74.

HRMS (ESI-TOF) Calc. for  $\text{C}_9\text{H}_{10}\text{Br}^{79}\text{NaNO}_2^+ [\text{M}+\text{Na}]^+$ : 265.9787; found: 265.9800

HRMS (ESI-TOF) Calc. for  $\text{C}_9\text{H}_{10}\text{Br}^{81}\text{NaNO}_2^+ [\text{M}+\text{Na}]^+$ : 267.9787; found: 267.9781

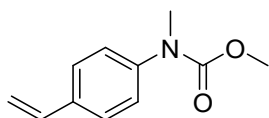

**Methyl methyl(4-vinylphenyl) carbamate (4k):** (28 mg, white liquid, yield: 49%)

$^1\text{H NMR}$  (400 MHz,  $\text{CDCl}_3$ )  $\delta$  7.44 – 7.35 (m, 2H), 7.20 (d,  $J = 8.2$  Hz, 2H), 6.70 (dd,  $J = 17.6, 10.9$  Hz, 1H), 5.72 (dd,  $J = 17.6, 0.9$  Hz, 1H), 5.25 (dd,  $J = 10.9, 0.9$  Hz, 1H), 3.71 (s, 3H), 3.30 (s, 3H).

$^{13}\text{C NMR}$  (101 MHz,  $\text{CDCl}_3$ )  $\delta$  156.21, 142.74, 136.09, 135.54, 126.74, 125.80, 114.19, 53.10, 37.83.

HRMS (ESI-TOF) Calc. for  $\text{C}_{11}\text{H}_{14}\text{NO}_2^+$   $[\text{M}+\text{H}]^+$ : 192.1019; found: 192.1019

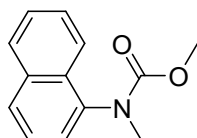

**Methyl methyl(naphthalen-1-yl) carbamate (4l):** (63 mg, yellow liquid, yield: 98%)

$^1\text{H NMR}$  (400 MHz,  $\text{CDCl}_3$ )  $\delta$  7.94 – 7.87 (m, 1H), 7.81 (t,  $J = 7.6$  Hz, 2H), 7.58 – 7.44 (m, 3H), 7.35 (d,  $J = 7.4$  Hz, 1H), 3.58 (s, 3H), 3.38 (s, 3H).

$^{13}\text{C NMR}$  (101 MHz,  $\text{CDCl}_3$ )  $\delta$  157.13, 139.62, 134.68, 130.32, 128.61, 128.11, 126.95, 126.41, 125.85, 124.97, 122.67, 53.14, 38.56.

HRMS (ESI-TOF) Calc. for  $\text{C}_{13}\text{H}_{15}\text{NO}_2^+$   $[\text{M}+\text{H}]^+$ : 216.1019 ; found: 216.1022

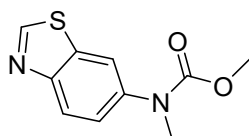

**Methyl benzo[d]thiazol-6-yl(methyl) carbamate (4m):** (21 mg, brown liquid, yield: 31%)

$^1\text{H NMR}$  (400 MHz,  $\text{CDCl}_3$ )  $\delta$  8.99 (d,  $J = 1.6$  Hz, 1H), 8.10 (dd,  $J = 8.6, 1.8$  Hz, 1H), 7.84 (s, 1H), 7.40 (d,  $J = 8.7$  Hz, 1H), 3.72 (s, 3H), 3.37 (s, 3H).

$^{13}\text{C NMR}$  (101 MHz,  $\text{CDCl}_3$ )  $\delta$  156.29, 154.56, 151.47, 141.07, 134.24, 124.86, 123.79, 119.24, 53.26, 38.32.

HRMS (ESI-TOF) Calc. for  $\text{C}_{10}\text{H}_{10}\text{NaN}_2\text{O}_2\text{S}^+$   $[\text{M}+\text{Na}]^+$ : 245.0355; found: 245.0357

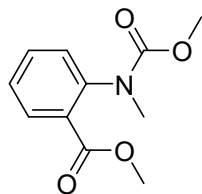

**Methyl 2-((methoxycarbonyl)(methyl)amino) benzoate (4p):** (30 mg, white liquid, yield: 45%)

$^1\text{H NMR}$  (400 MHz,  $\text{CDCl}_3$ )  $\delta$  8.01 – 7.90 (m, 1H), 7.65 – 7.50 (m, 1H), 7.35 (q,  $J = 7.2, 6.6$  Hz, 1H), 7.26 (q,  $J = 7.9, 6.7$  Hz, 1H), 3.87 (s, 3H), 3.58 (s, 3H), 3.25 (s, 3H).

$^{13}\text{C NMR}$  (101 MHz,  $\text{CDCl}_3$ )  $\delta$  166.51, 156.13, 143.07, 133.26, 131.42, 128.75, 128.27, 127.28, 52.93, 52.46, 38.29.

HRMS (ESI-TOF) Calc. for  $\text{C}_{11}\text{H}_{14}\text{NO}_4^+$   $[\text{M}+\text{H}]^+$ : 246.0737; found: 246.0748

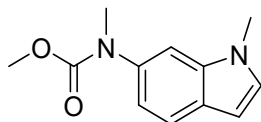

**Methyl methyl(1-methyl-1H-indol-6-yl) carbamate (4q):** (38 mg, yellow liquid, yield: 59%)

<sup>1</sup>H NMR (400 MHz, Chloroform-*d*) δ 7.58 (d, *J* = 8.3 Hz, 1H), 7.22 – 7.12 (m, 1H), 7.07 (d, *J* = 3.1 Hz, 1H), 6.96 (dd, *J* = 8.3, 1.9 Hz, 1H), 6.48 (dd, *J* = 3.0, 0.9 Hz, 1H), 3.77 (s, 3H), 3.73 – 3.61 (m, 3H), 3.36 (s, 3H).

<sup>13</sup>C NMR (101 MHz, CDCl<sub>3</sub>) δ 156.89, 137.76, 136.71, 129.89, 127.21, 121.18, 118.29, 107.35, 101.18, 52.99, 38.95, 32.99.

HRMS (ESI-TOF) Calc. for C<sub>12</sub>H<sub>14</sub>NaN<sub>2</sub>O<sub>2</sub><sup>+</sup> [M+Na]<sup>+</sup>: 241.0947; found: 241.0954.

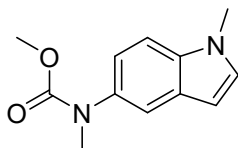

**Methyl methyl(1-methyl-1H-indol-5-yl) carbamate (4r):** (25 mg, brown liquid, yield: 38%)

<sup>1</sup>H NMR (400 MHz, CDCl<sub>3</sub>) δ 7.50 – 7.42 (m, 1H), 7.30 (d, *J* = 8.6 Hz, 1H), 7.08 (d, *J* = 3.2 Hz, 2H), 6.52 – 6.44 (m, 1H), 3.79 (s, 3H), 3.67 (s, 3H), 3.34 (s, 3H).

<sup>13</sup>C NMR (101 MHz, CDCl<sub>3</sub>) δ 157.01, 135.61, 135.31, 129.98, 128.67, 120.54, 118.55, 109.57, 101.28, 52.95, 39.00, 33.06.

HRMS (ESI-TOF) Calc. for C<sub>12</sub>H<sub>14</sub>NaN<sub>2</sub>O<sub>2</sub><sup>+</sup> [M+Na]<sup>+</sup>: 241.0947; found: 241.0954.

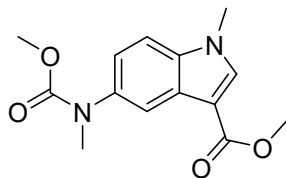

**Methyl 5-((methoxycarbonyl)(methyl)amino)-1-methyl-1H-indole-3-carboxylate (4r'):**

(33 mg, brown liquid, yield: 42%)

<sup>1</sup>H NMR (400 MHz, CDCl<sub>3</sub>) δ 7.99 (d, *J* = 2.1 Hz, 1H), 7.79 (s, 1H), 7.32 (d, *J* = 8.7 Hz, 1H), 7.16 (d, *J* = 8.7 Hz, 1H), 3.90 (s, 3H), 3.83 (s, 3H), 3.68 (s, 3H), 3.35 (s, 3H).

<sup>13</sup>C NMR (101 MHz, CDCl<sub>3</sub>) δ 165.35, 156.82, 138.10, 136.15, 135.71, 127.01, 122.14, 119.22, 110.34, 107.22, 53.09, 51.21, 38.92, 33.76.

HRMS (ESI-TOF) Calc. for C<sub>14</sub>H<sub>17</sub>N<sub>2</sub>O<sub>4</sub><sup>+</sup> [M+H]<sup>+</sup>: 277.1183; found: 277.1187

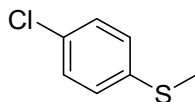

**(4-Chlorophenyl) (methyl) sulfane :** (40 mg, white liquid, yield: 84%)

<sup>1</sup>H NMR (400 MHz, CDCl<sub>3</sub>) δ 7.32 – 7.24 (m, 2H), 7.23 – 7.16 (m, 2H), 2.48 (s, 3H).

<sup>13</sup>C NMR (101 MHz, CDCl<sub>3</sub>) δ 137.14, 131.06, 129.05, 128.08, 77.48, 77.16, 76.85, 16.26.

The analytical data are consistent with those reported in the literature.<sup>7</sup>

## 4. References

- 1 K. Takeuchi, M.-Y. Chen, H.-Y. Yuan, H. Koizumi, K. Matsumoto, N. Fukaya, Y.-K. Choe, S. Shigeyasu, S. Matsumoto, S. Hamura and J.-C. Choi, *Chem. Eur. J.*, 2021, **27**, 18066–18073.
- 2 L. Li, M. Xue, X. Yan, W. Liu, K. Xu and S. Zhang, *Org. Biomol. Chem.*, 2018, **16**, 4615–4618.
- 3 B. Zhang, W. Deng and Z.-Y. Xu, *Organometallics*, 2023, **42**, 588–596.
- 4 X. Yang, Y. Zhang and D. Ma, *Adv. Syn. & Cata.*, 2012, **354**, 2443–2446.
- 5 S.-N. Wang, G.-Y. Zhang, A. Shoberu and J.-P. Zou, *J. Org. Chem.*, 2021, **86**, 9067–9075.
- 6 Q. Zhang, H.-Y. Yuan, N. Fukaya, H. Yasuda and J.-C. Choi, *Green Chem.*, 2017, **19**, 5614–5624.
- 7 T. Nakajima, K. Takano, H. Maeda, Y. Ogiwara and N. Sakai, *Chem. Asian J.*, 2021, **16**, 4103–4107.
- 8 N. Uhlig and C.-J. Li, *Chem. Eur. J.*, 2014, **20**, 12066–12070.
- 9 M. Noshita, Y. Shimizu, H. Morimoto and T. Ohshima, *Org. Lett.*, 2016, **18**, 6062–6065.
- 10 H. Seo, A.-C. Bédard, W. P. Chen, R. W. Hicklin, A. Alabugin and T. F. Jamison, *Tetrahedron*, 2018, **74**, 3124–3128.
- 11 E. Chung, S. Kim, A. Rakshit, P. Singh, J. Park, T. Jeong and I. S. Kim, *J. Org. Chem.*, 2023, **88**, 11227–11239.

## 5. NMR Spectroscopic Data for Products

### Figure S1 <sup>1</sup>H NMR spectrum for compound 3a

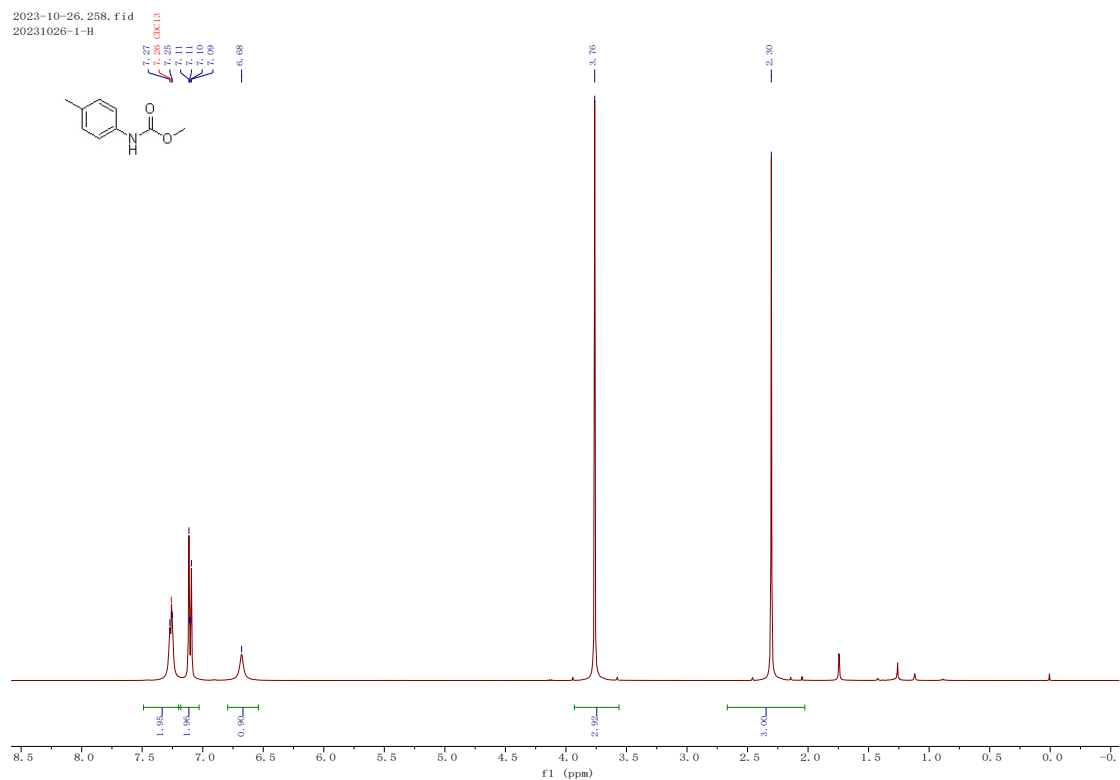

### Figure S2 <sup>13</sup>C NMR spectrum for compound 3a

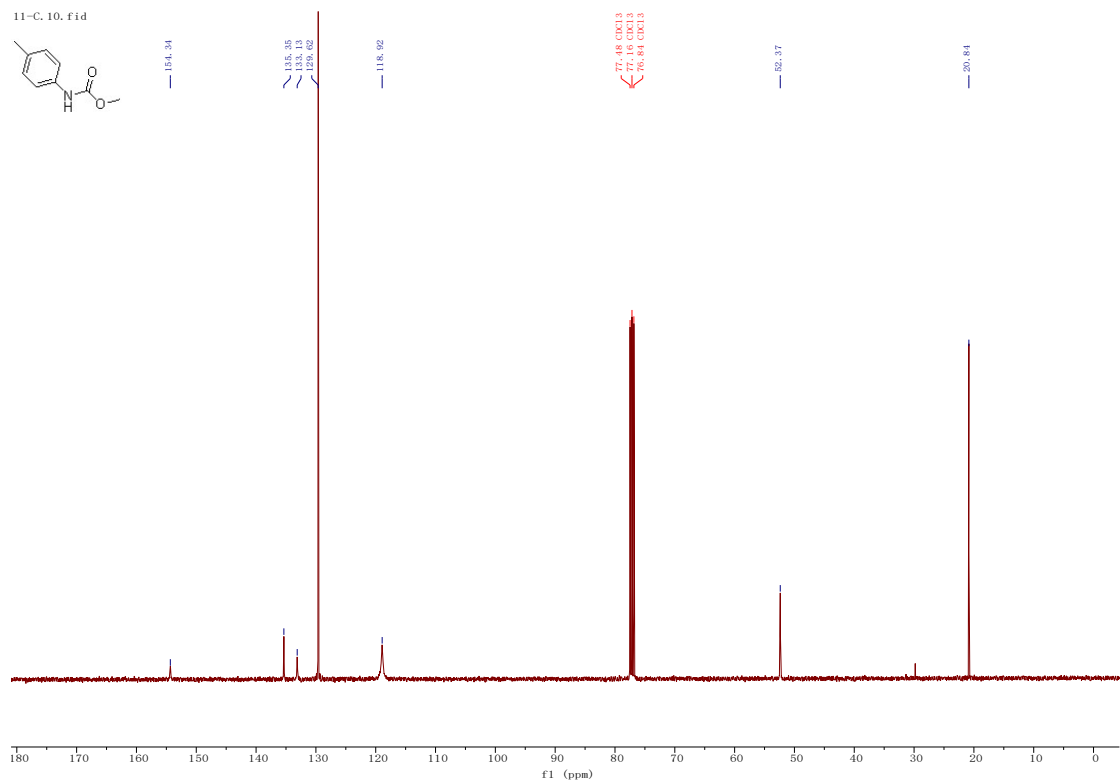



**Figure S3 <sup>1</sup>H NMR spectrum for compound 3b**

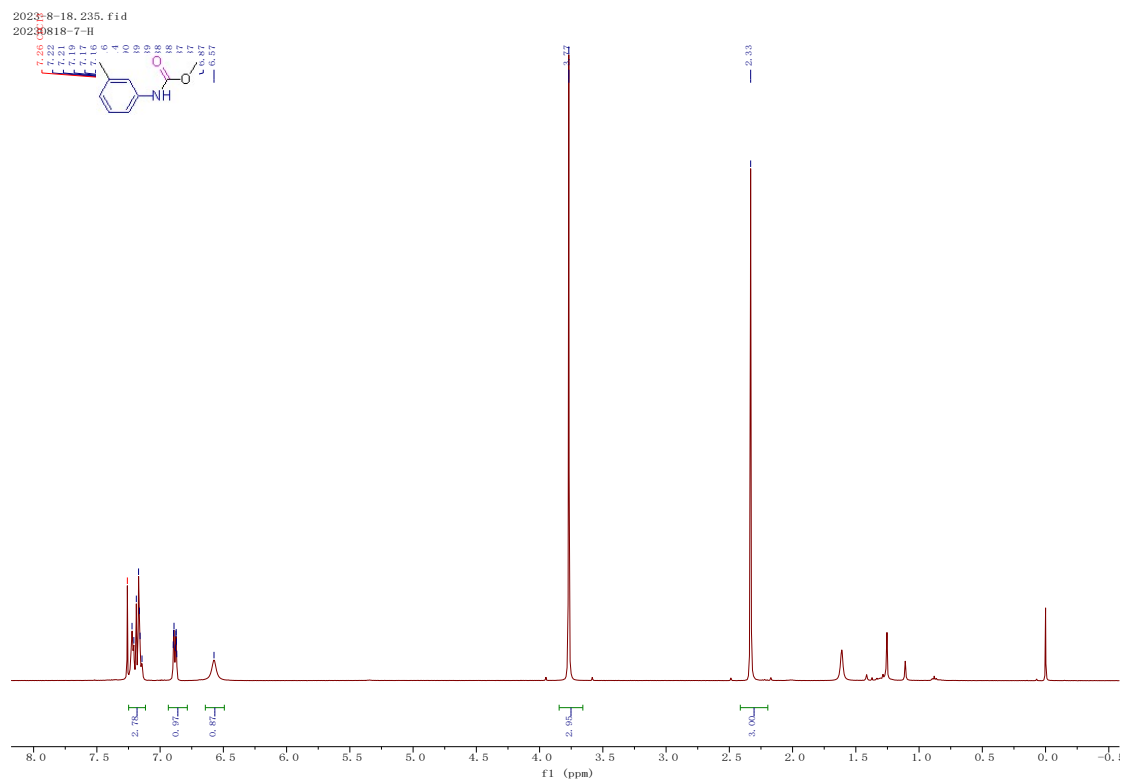

**Figure S4 <sup>13</sup>C NMR spectrum for compound 3b**

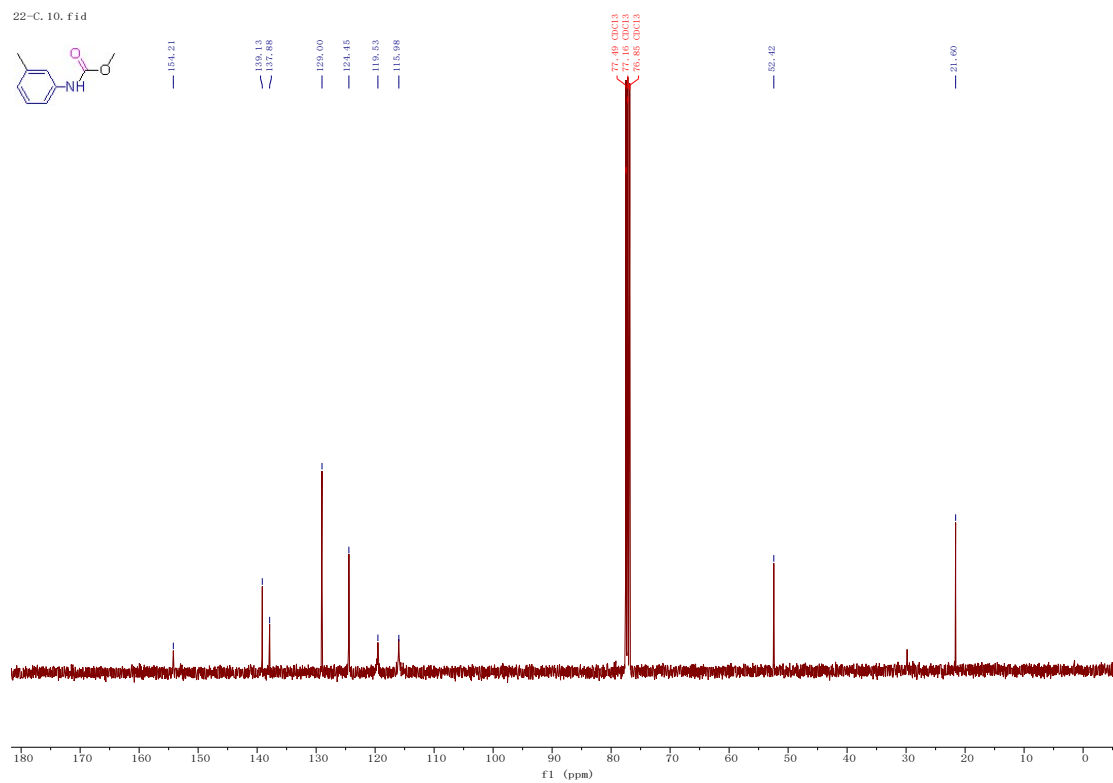

**Figure S5 <sup>1</sup>H NMR spectrum for compound 3c**

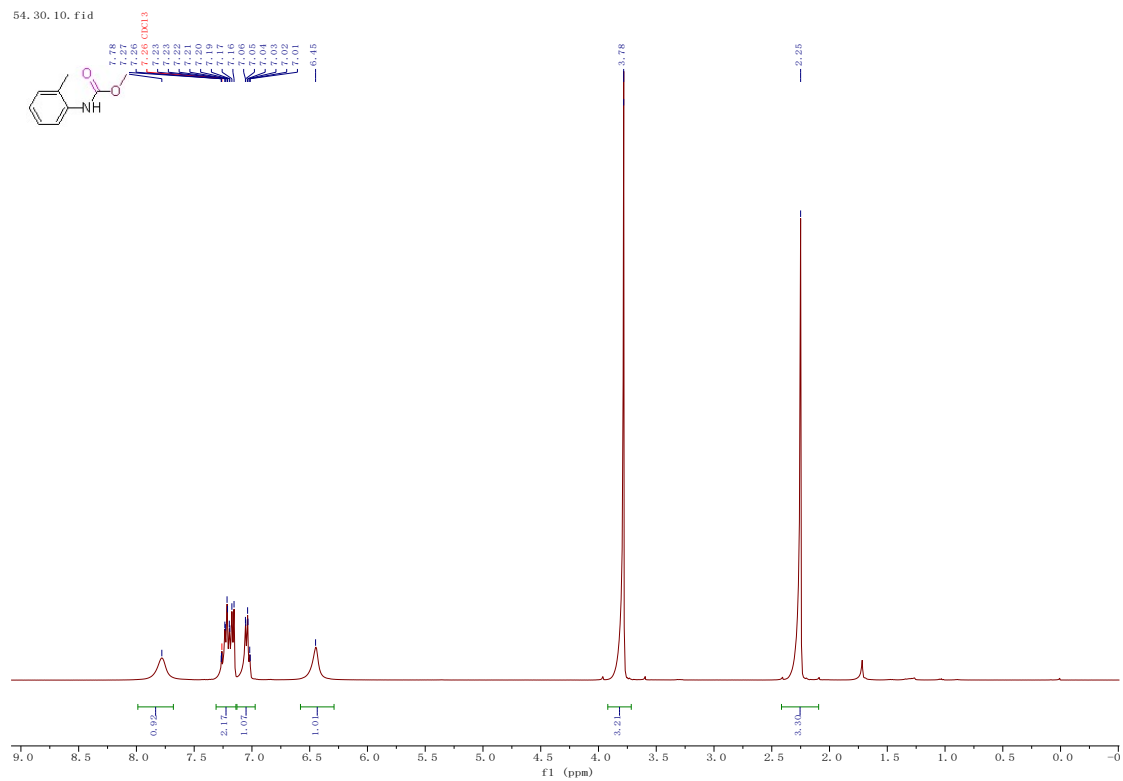

**Figure S6 <sup>13</sup>C NMR spectrum for compound 3c**

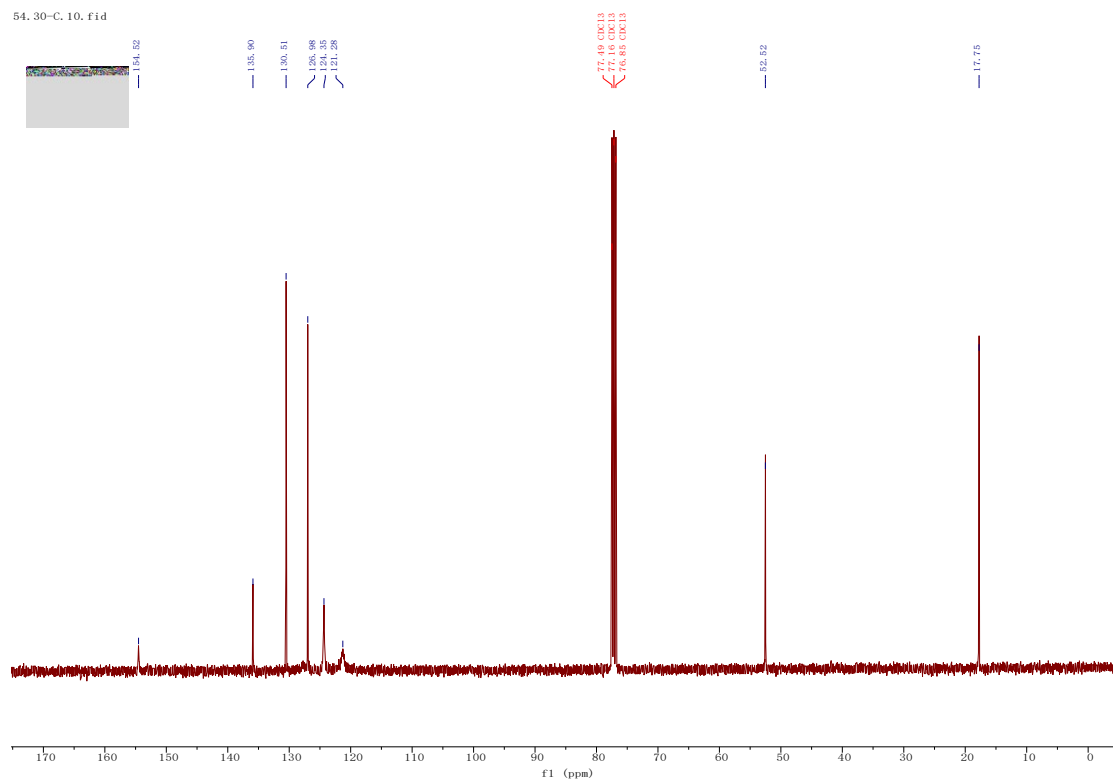

**Figure S7  $^1\text{H}$  NMR spectrum for compound 3d**

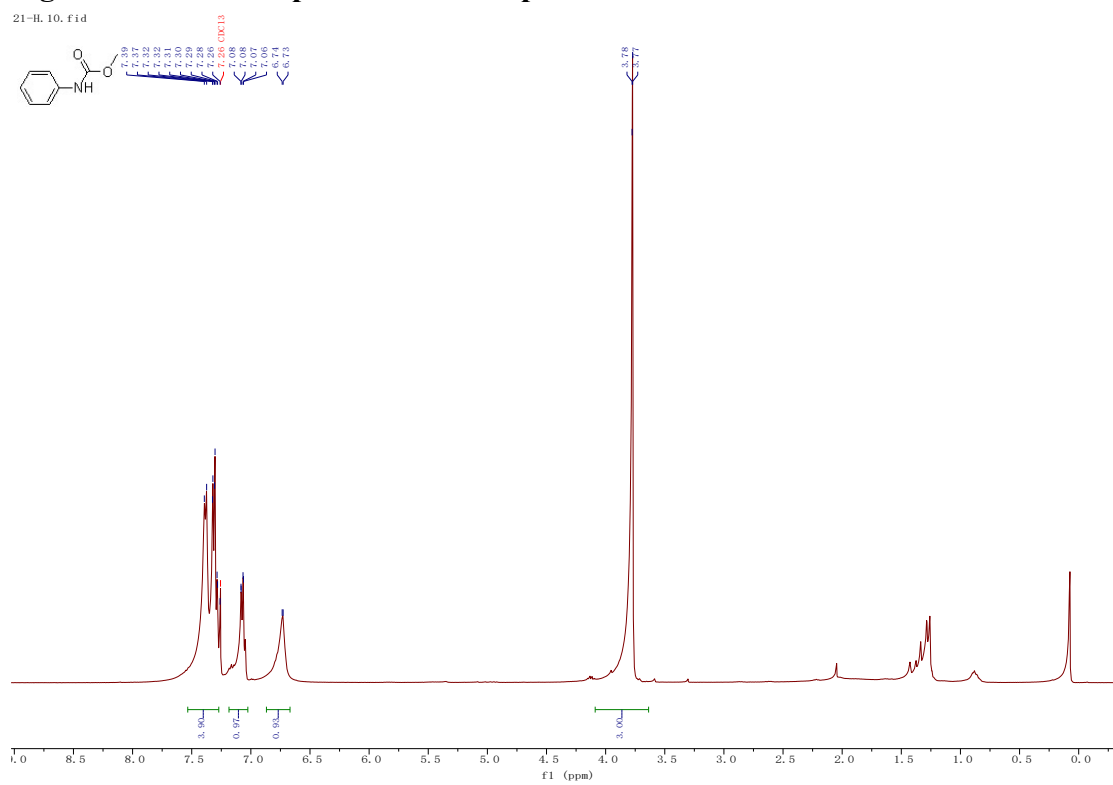

**Figure S8**  $^{13}\text{C}$  NMR spectrum for compound **3d**

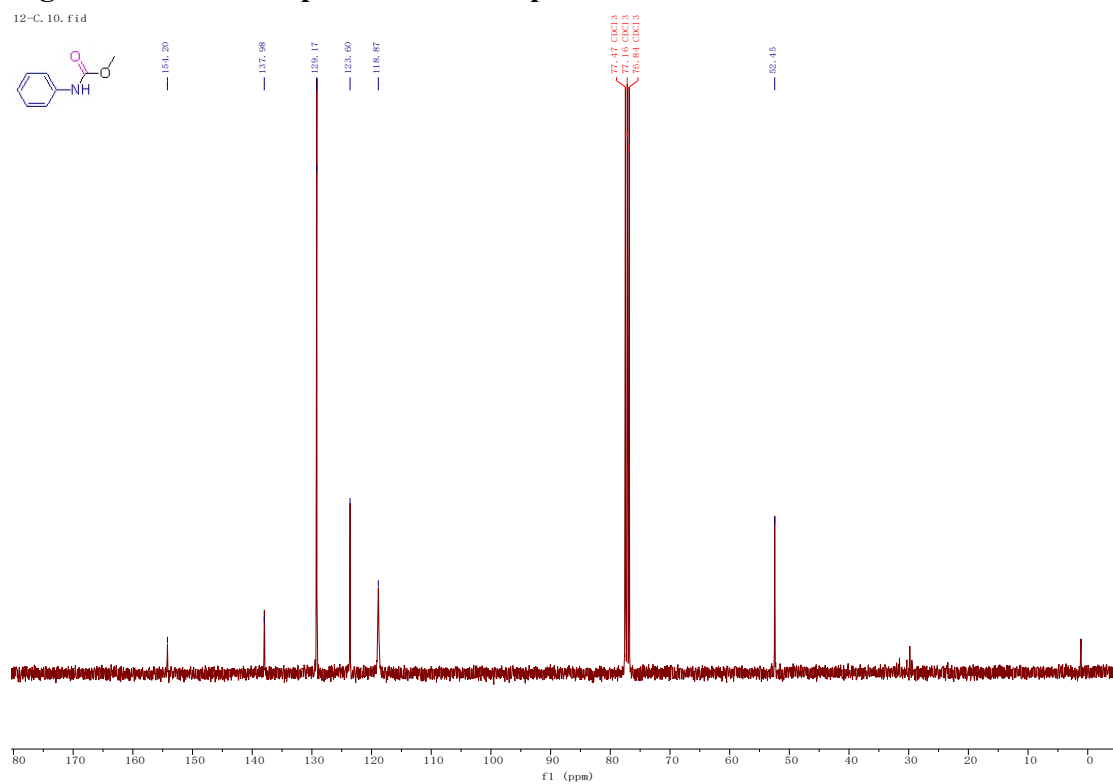

**Figure S9**  $^1\text{H}$  NMR spectrum for compound **3e** and **3t**

22-H, 10, f1d

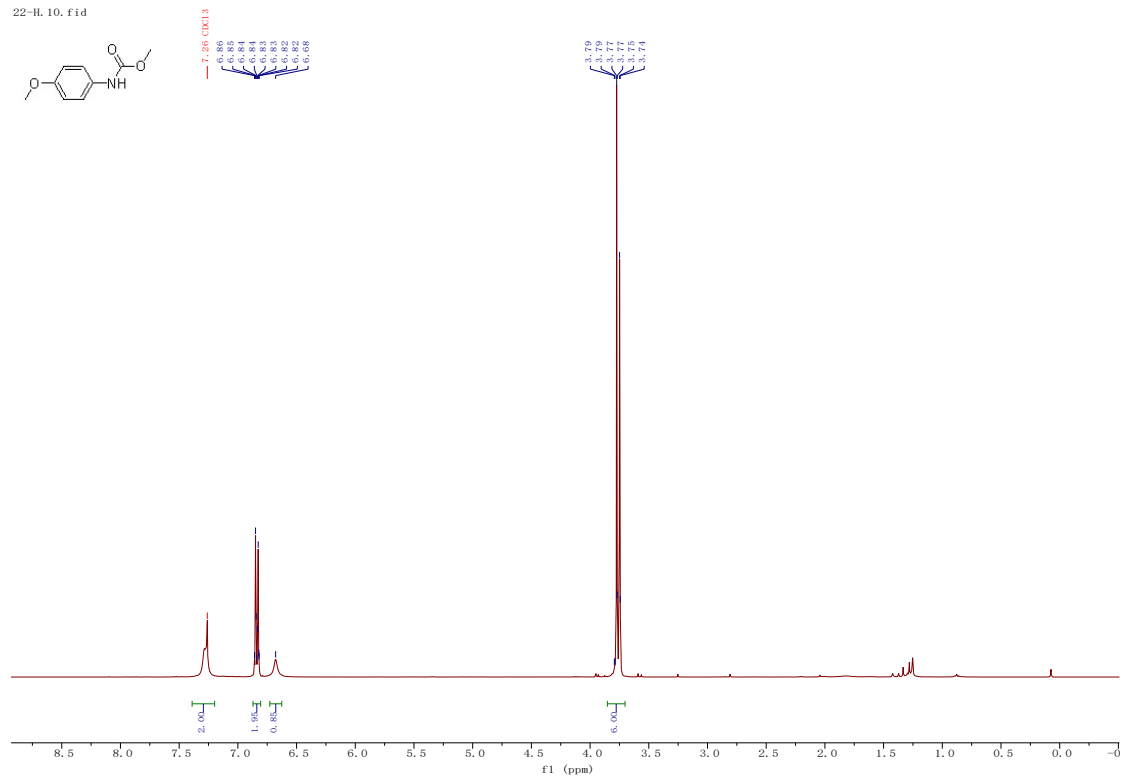

**Figure S10** <sup>13</sup>C NMR spectrum for compound 3e and 3t

13-C, 10, f1d

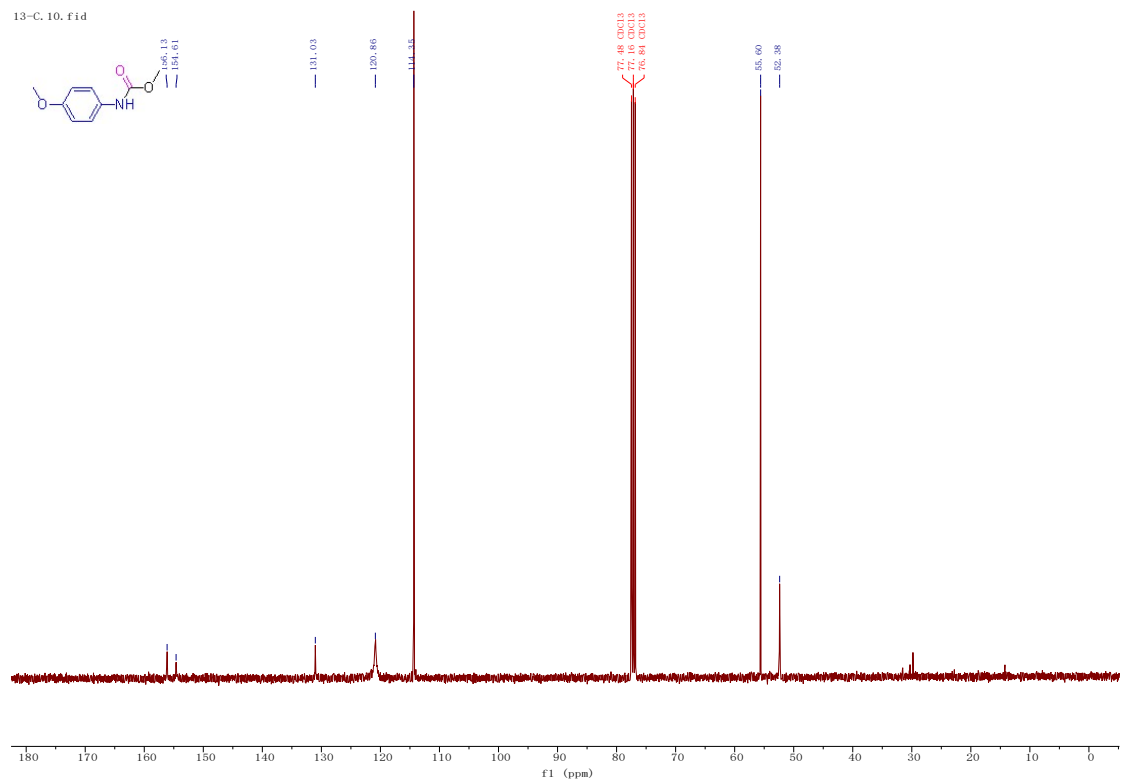

### Figure S11 <sup>1</sup>H NMR spectrum for compound 3f

2023-7-11, 192, fid  
20230711-9-H

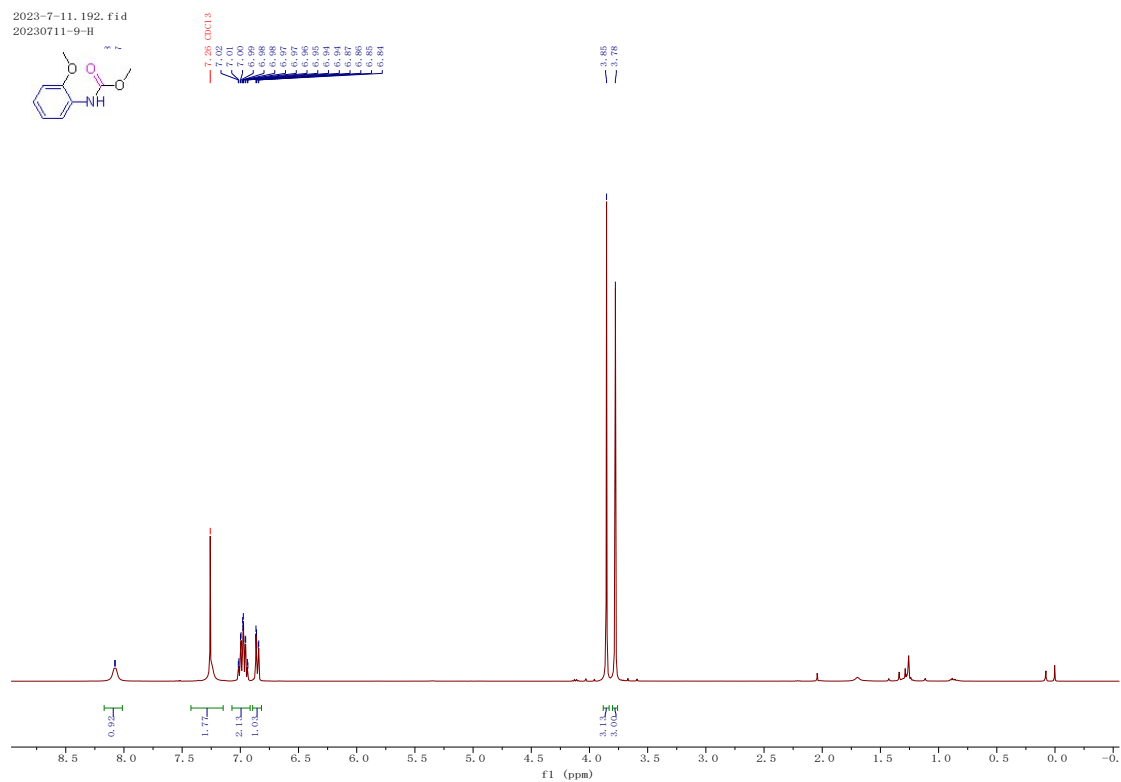

### Figure S12 <sup>13</sup>C NMR spectrum for compound 3f

13-C, 10, fid

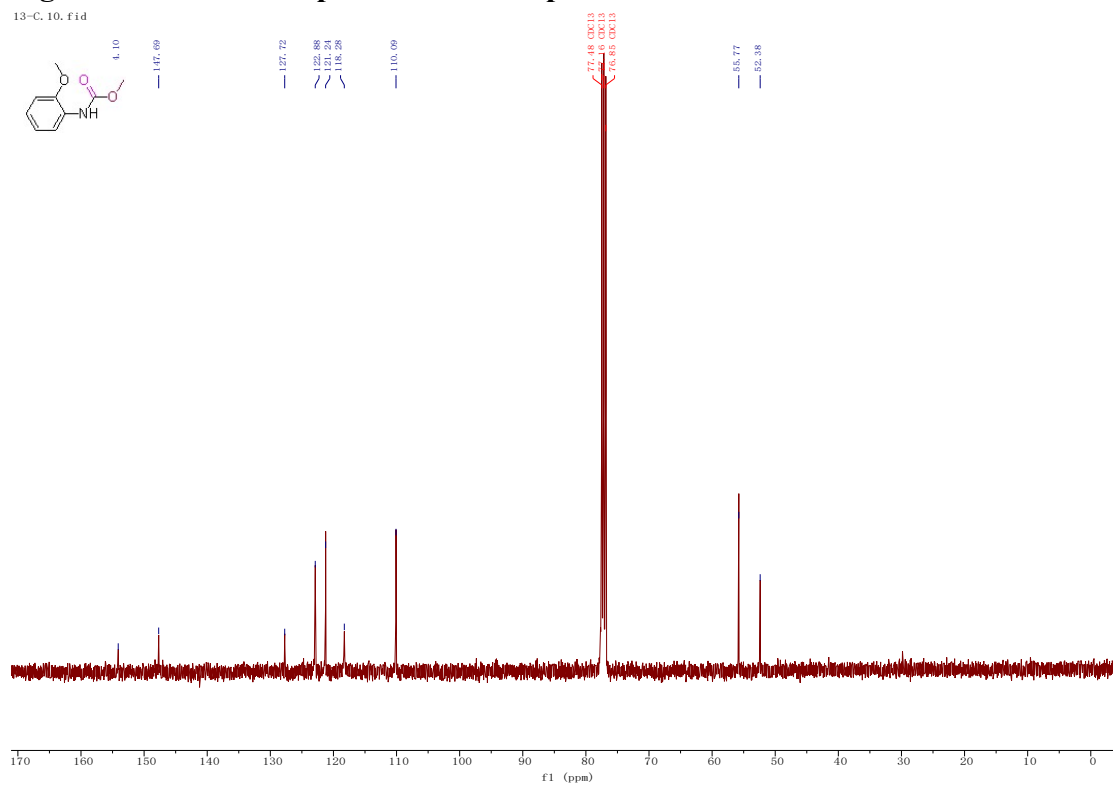

**Figure S13  $^1\text{H}$  NMR spectrum for compound 3g**

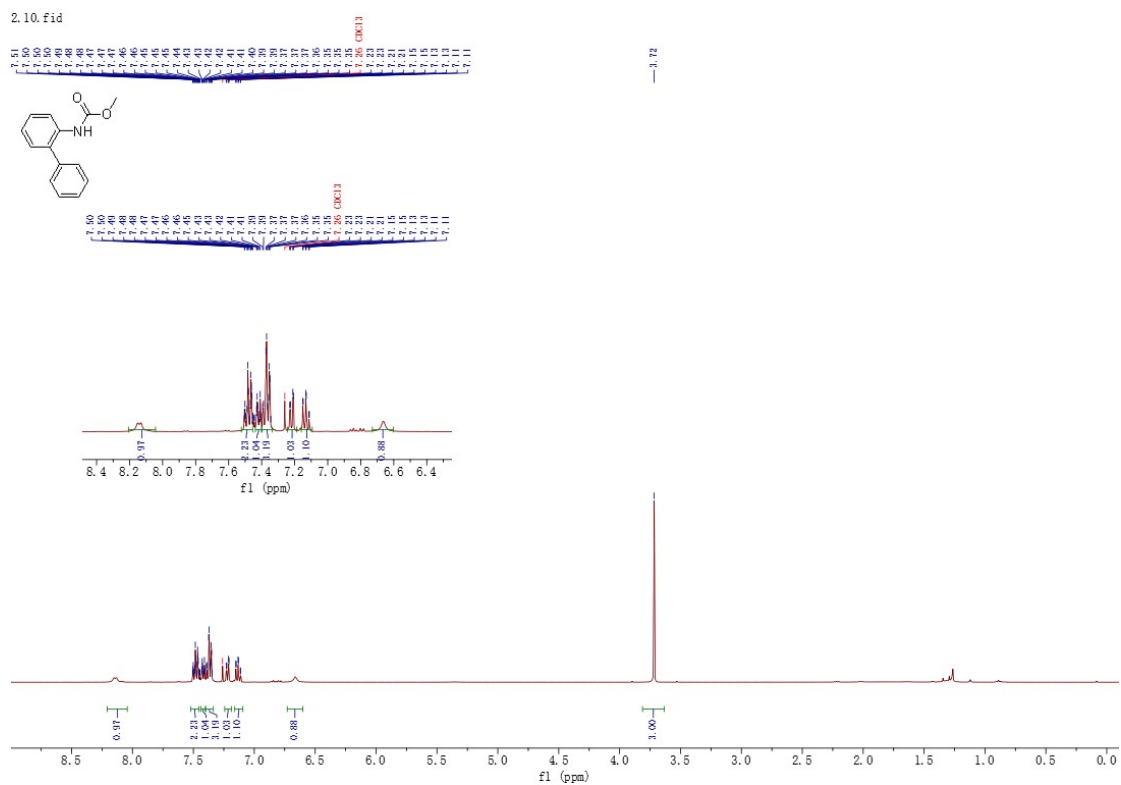

**Figure S14  $^{13}\text{C}$  NMR spectrum for compound 3g**

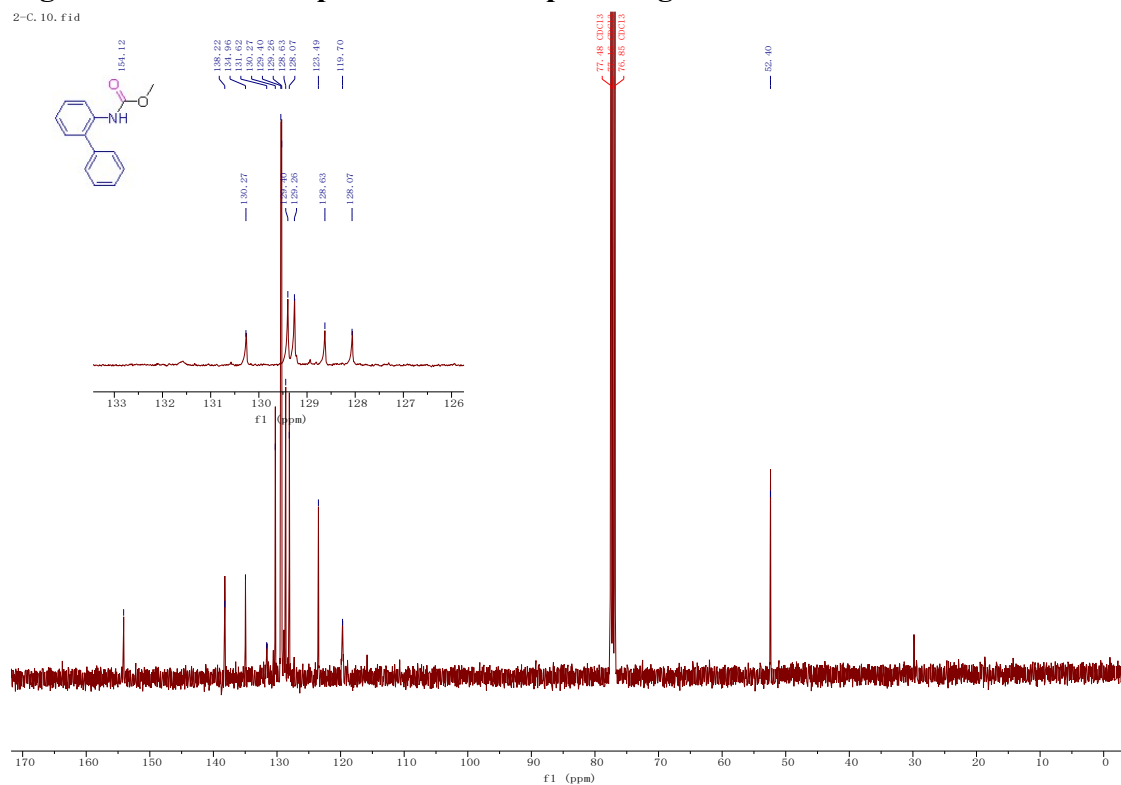

**Figure S15**  $^1\text{H}$  NMR spectrum for compound **3h**

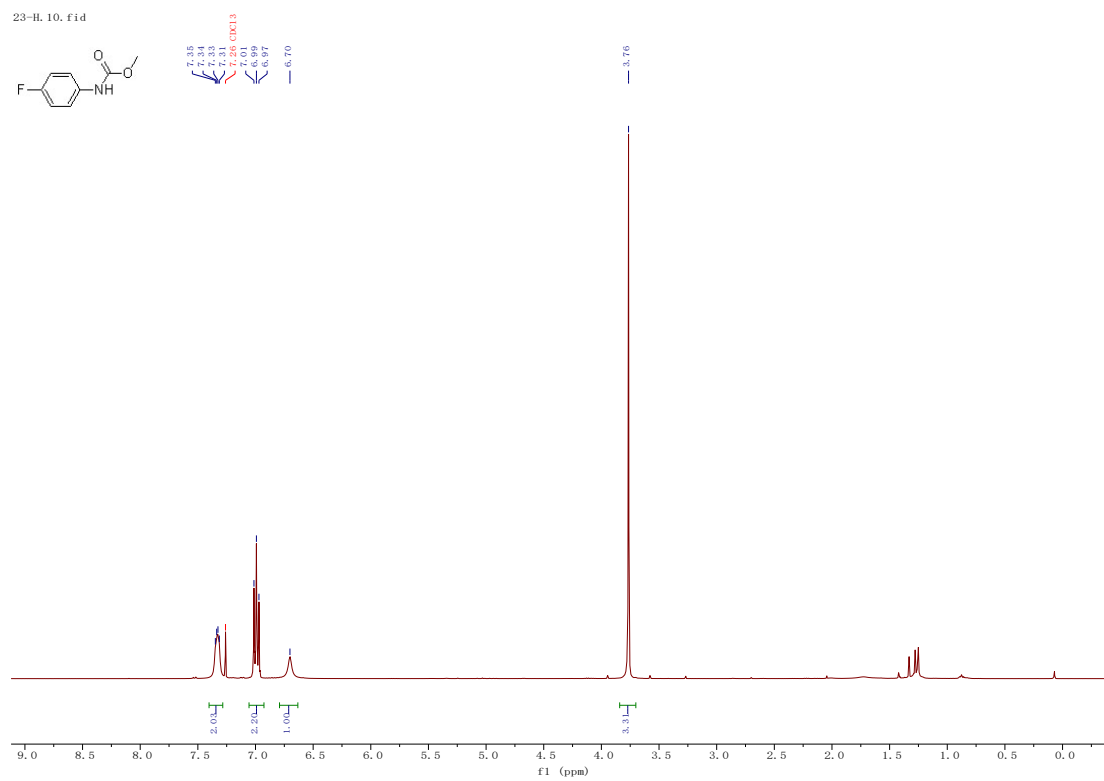

**Figure S16**  $^{13}\text{C}$  NMR spectrum for compound **3h**



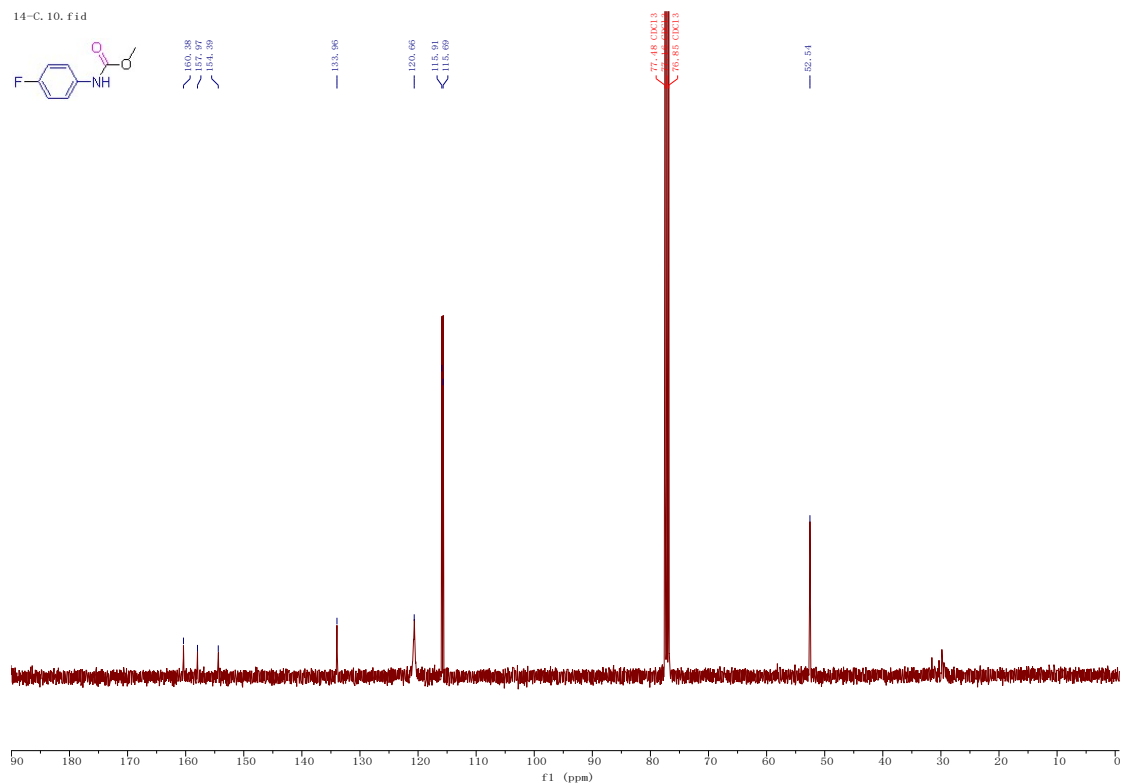

**Figure S17 <sup>1</sup>H NMR spectrum for compound 3i**

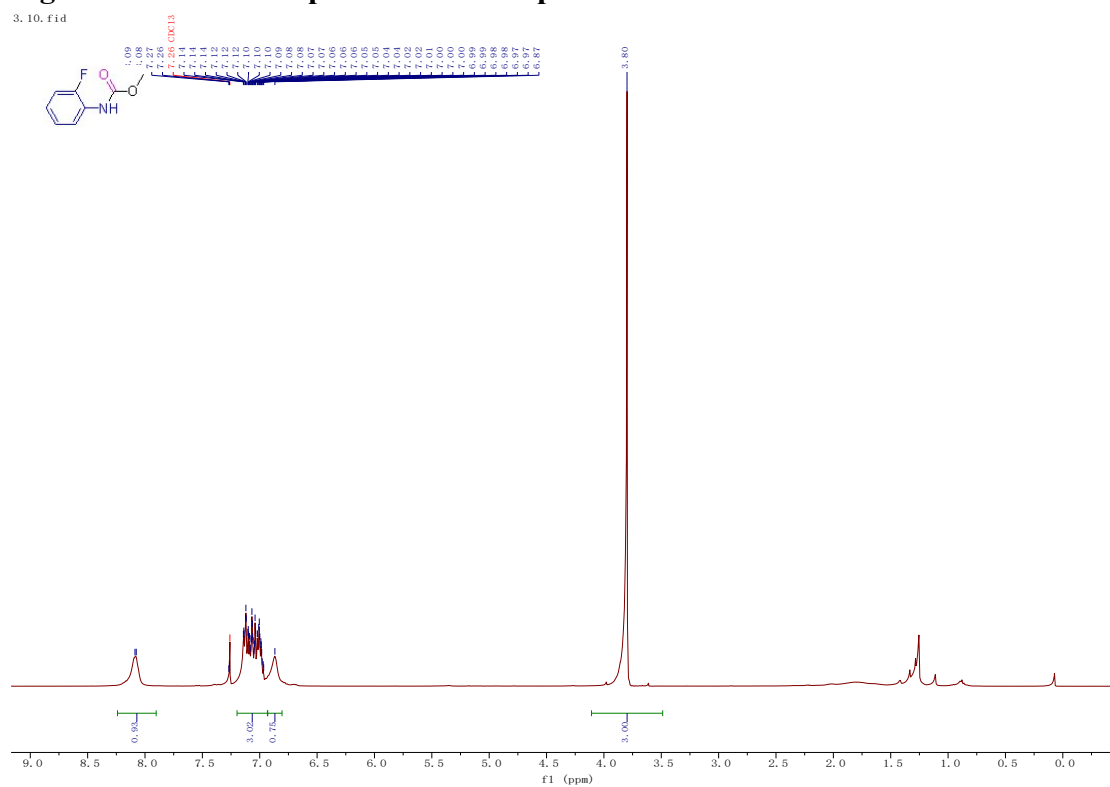

**Figure S18**  $^{13}\text{C}$  NMR spectrum for compound **3i**

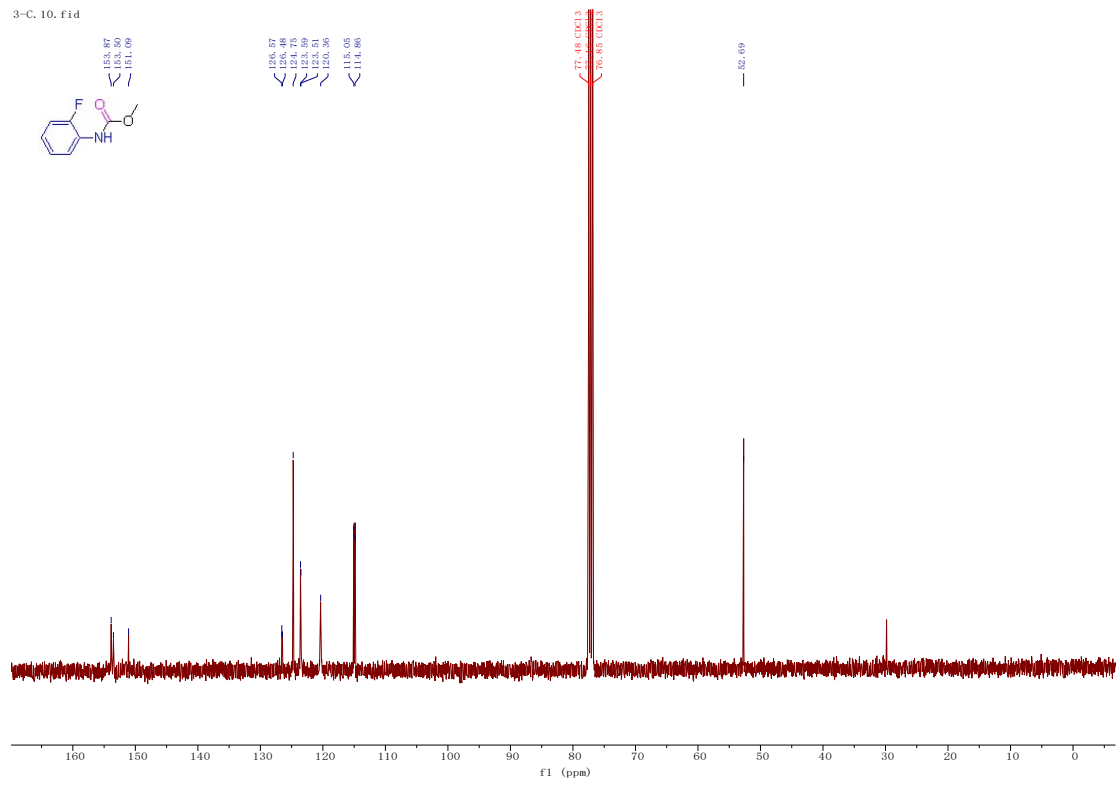

**Figure S19**  $^1\text{H}$  NMR spectrum for compound **3j**

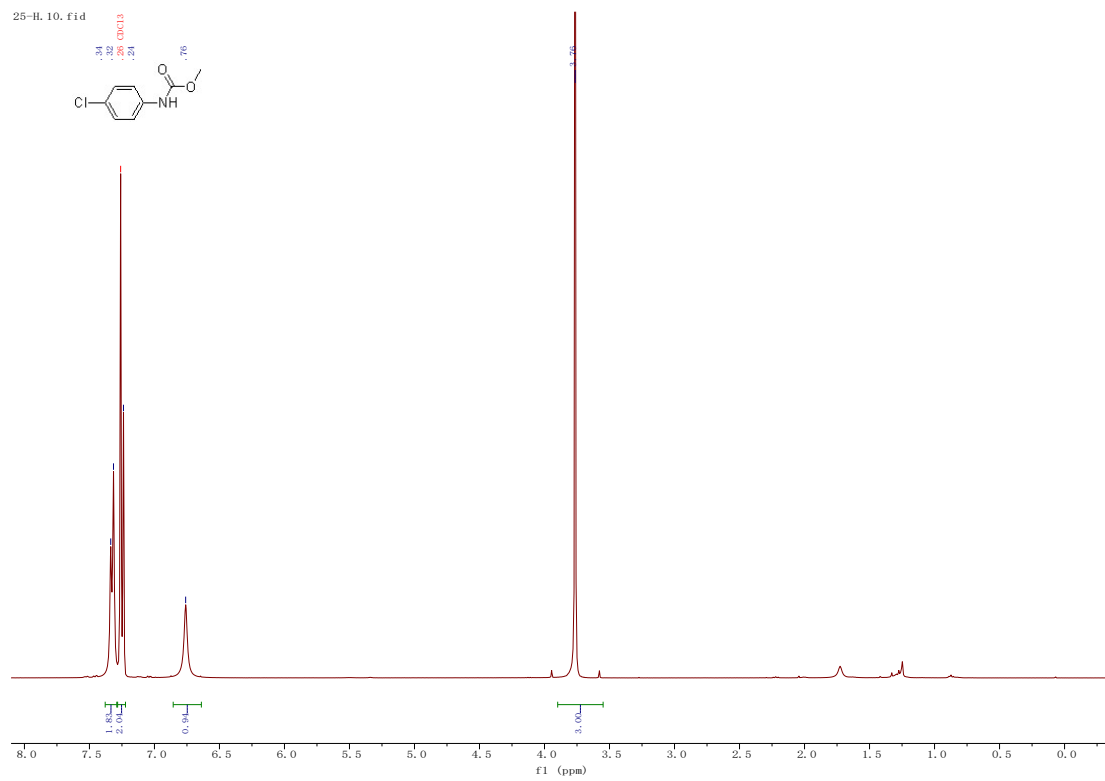

Figure S20 <sup>13</sup>C NMR spectrum for compound 3j

15-C. 10. fid

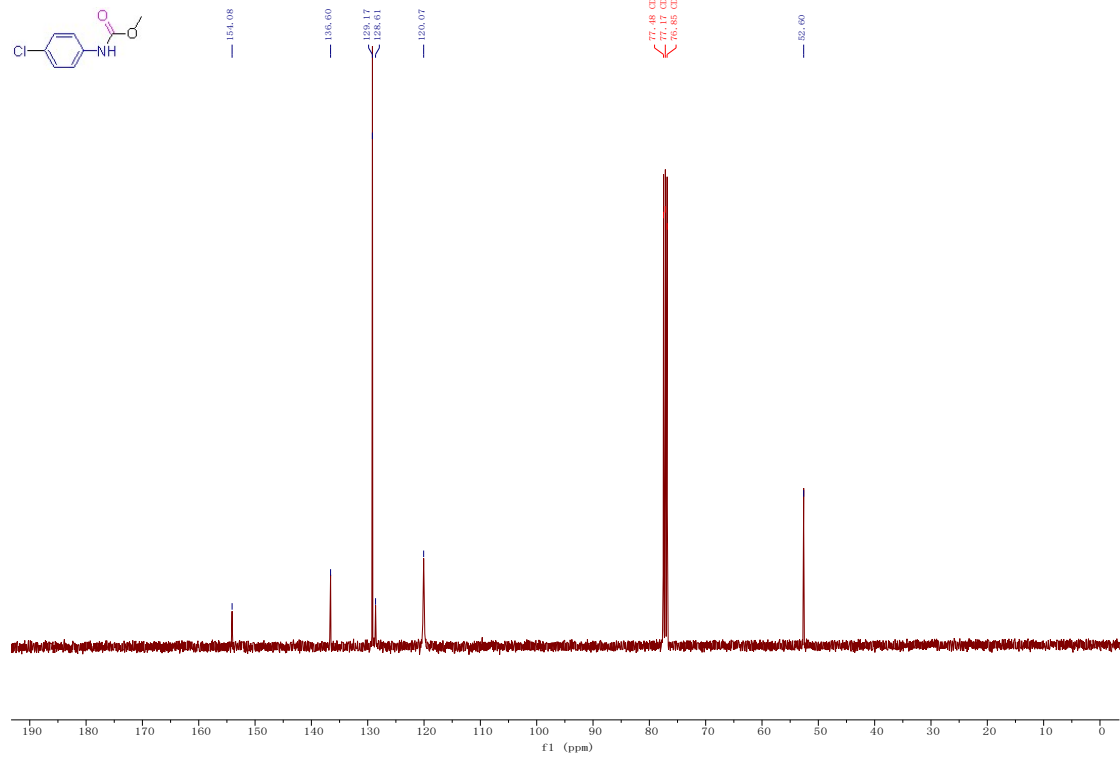

Figure S21 <sup>1</sup>H NMR spectrum for compound 3k

2023-6-30. 182. fid  
20230630-6-H

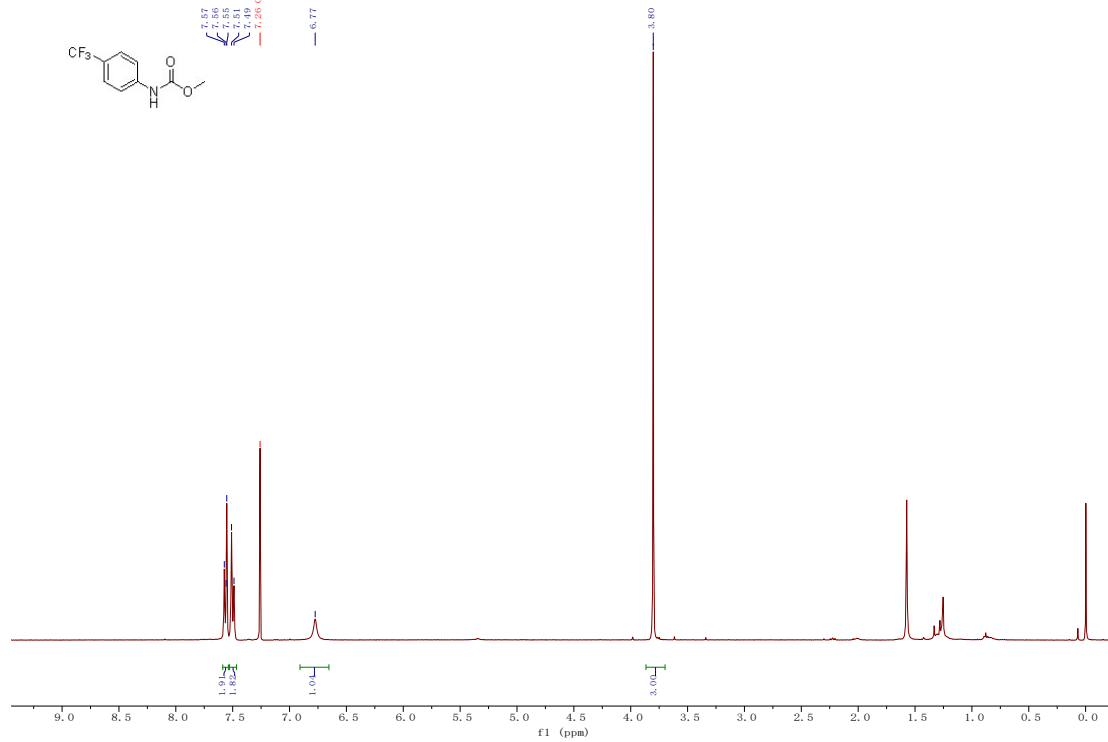

Figure S22 <sup>13</sup>C NMR spectrum for compound 3k

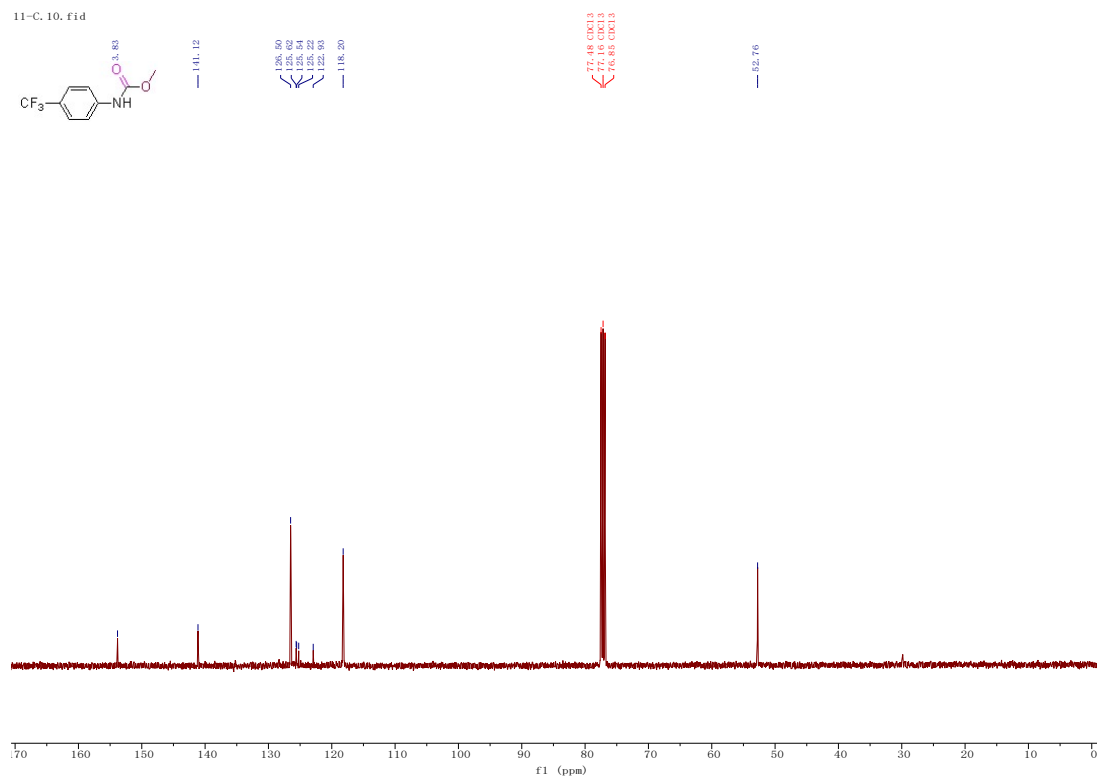

Figure S23 <sup>1</sup>H NMR spectrum for compound 3l

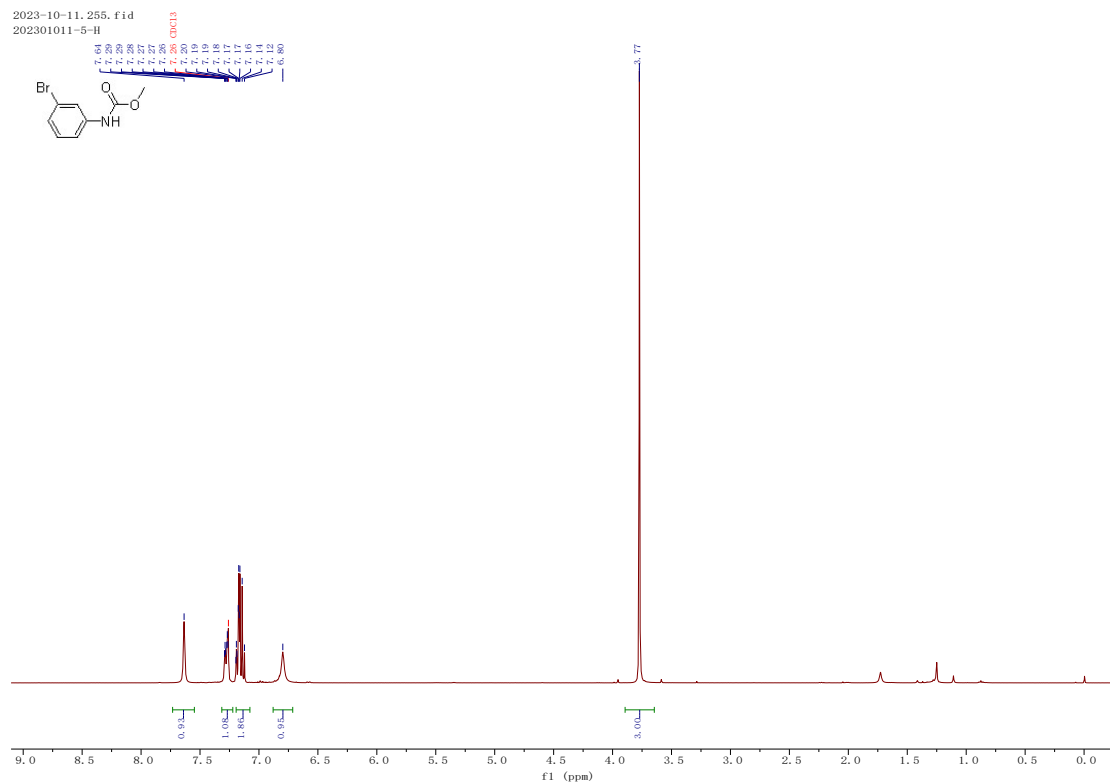

**Figure S24**  $^{13}\text{C}$  NMR spectrum for compound **3l**

YZP-C-11-54.61.10.fid

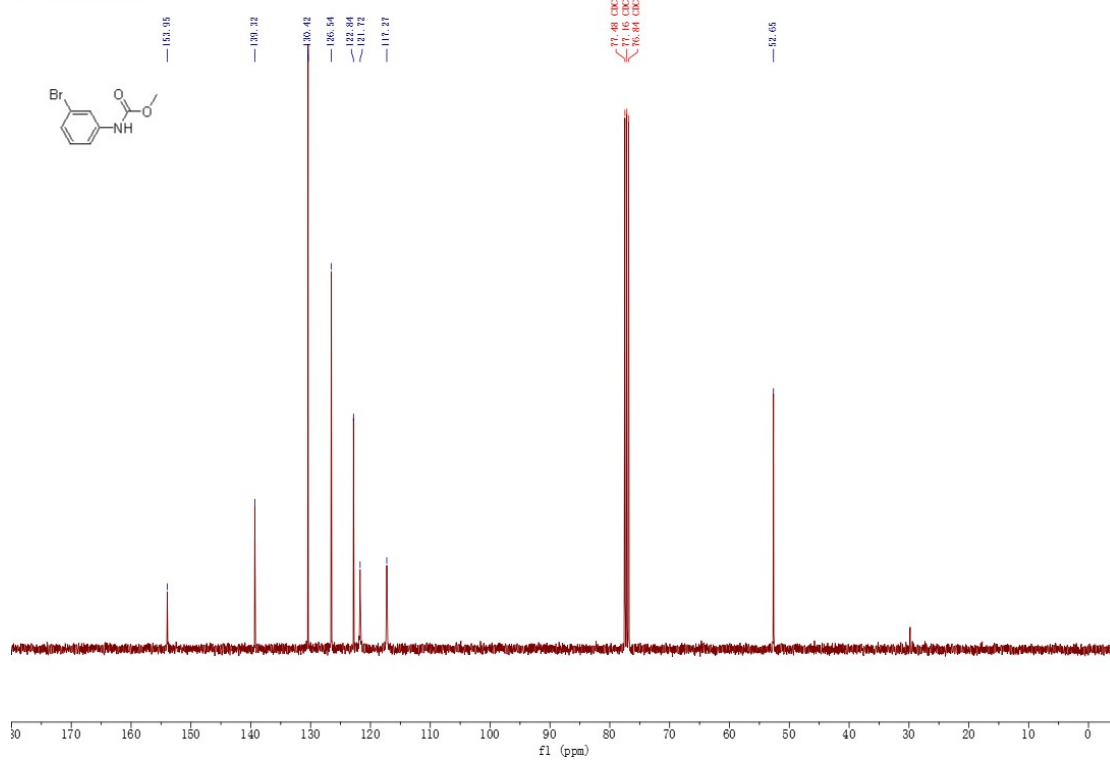

**Figure S25**  $^1\text{H}$  NMR spectrum for compound **3m**

16\_10.fid

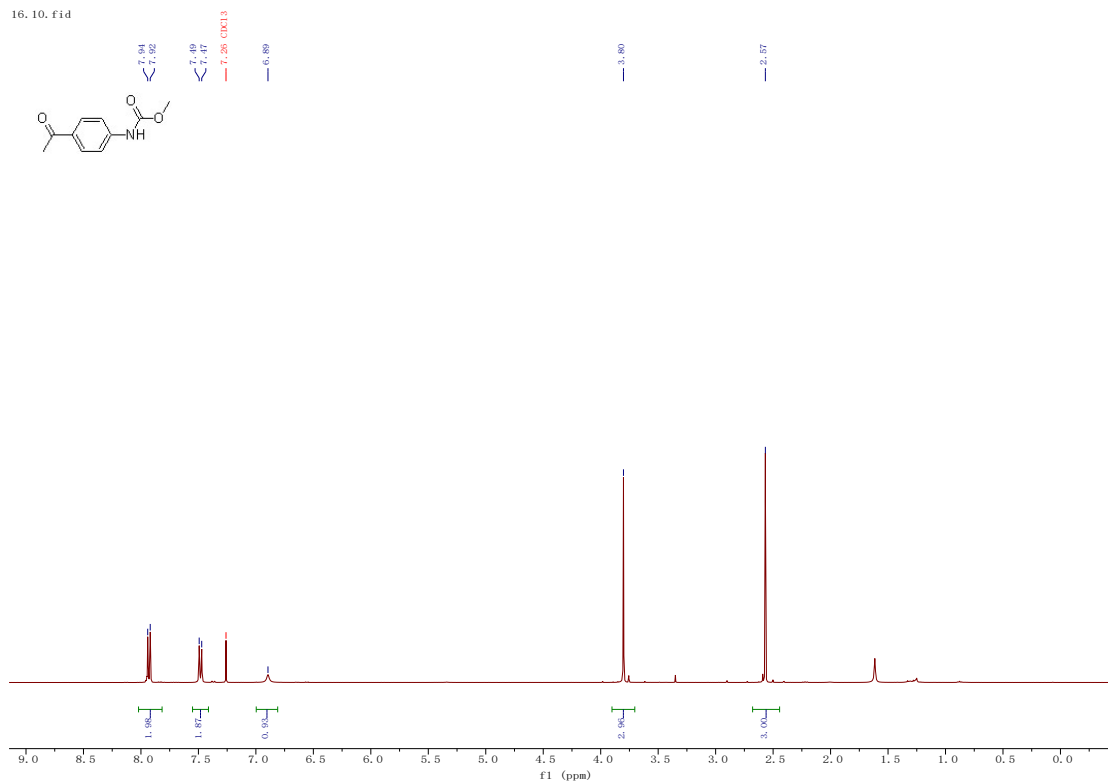

Figure S26 <sup>13</sup>C NMR spectrum for compound 3m

18-C\_10.fid

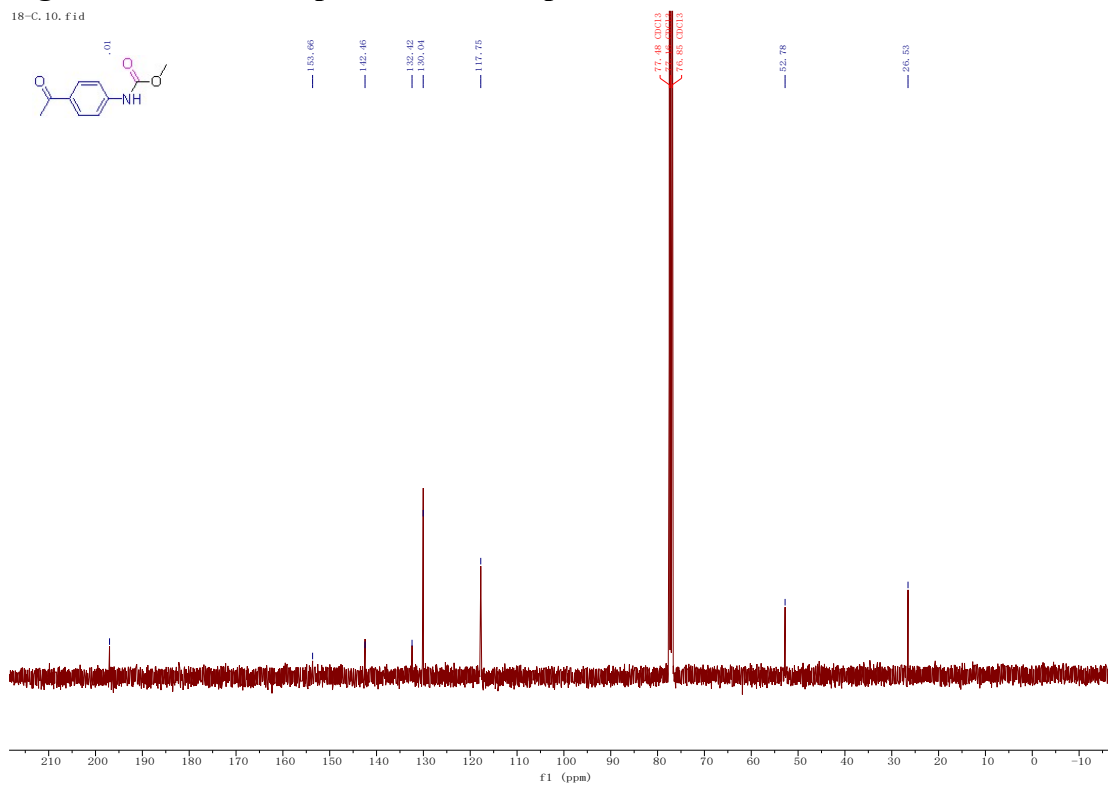

**Figure S27 <sup>1</sup>H NMR spectrum for compound 3n**

14\_10.fid

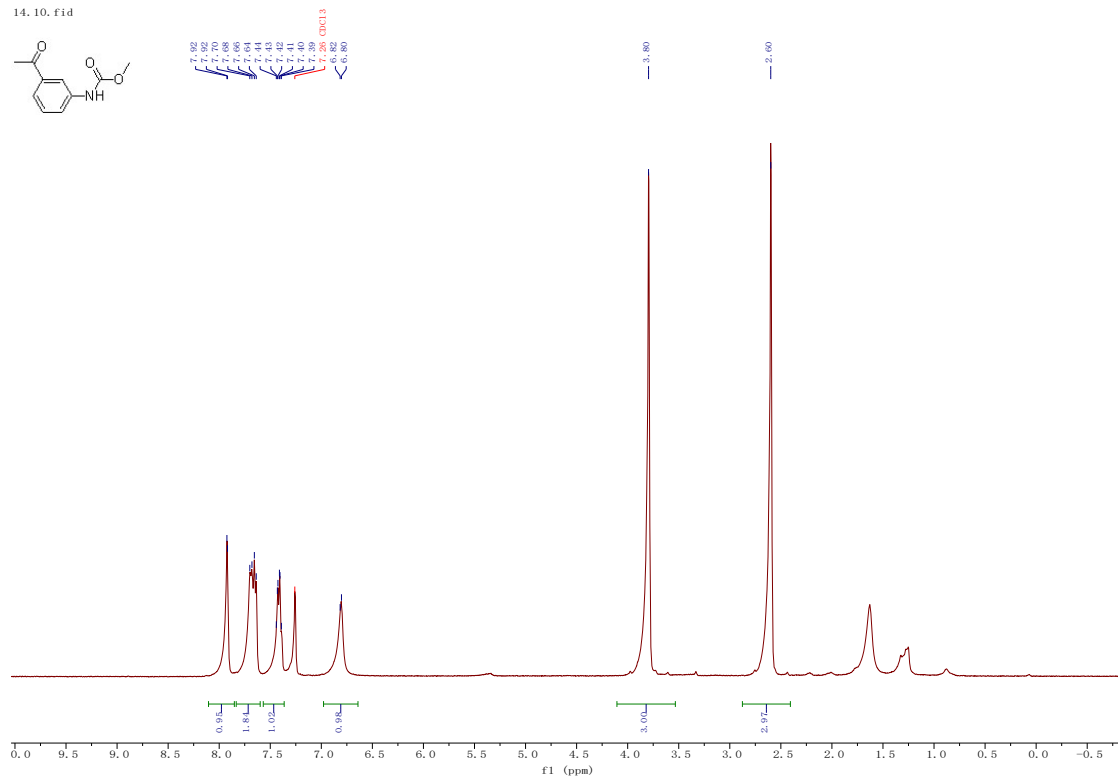

**Figure S28 <sup>13</sup>C NMR spectrum for compound 3n**

16-C\_10.fid

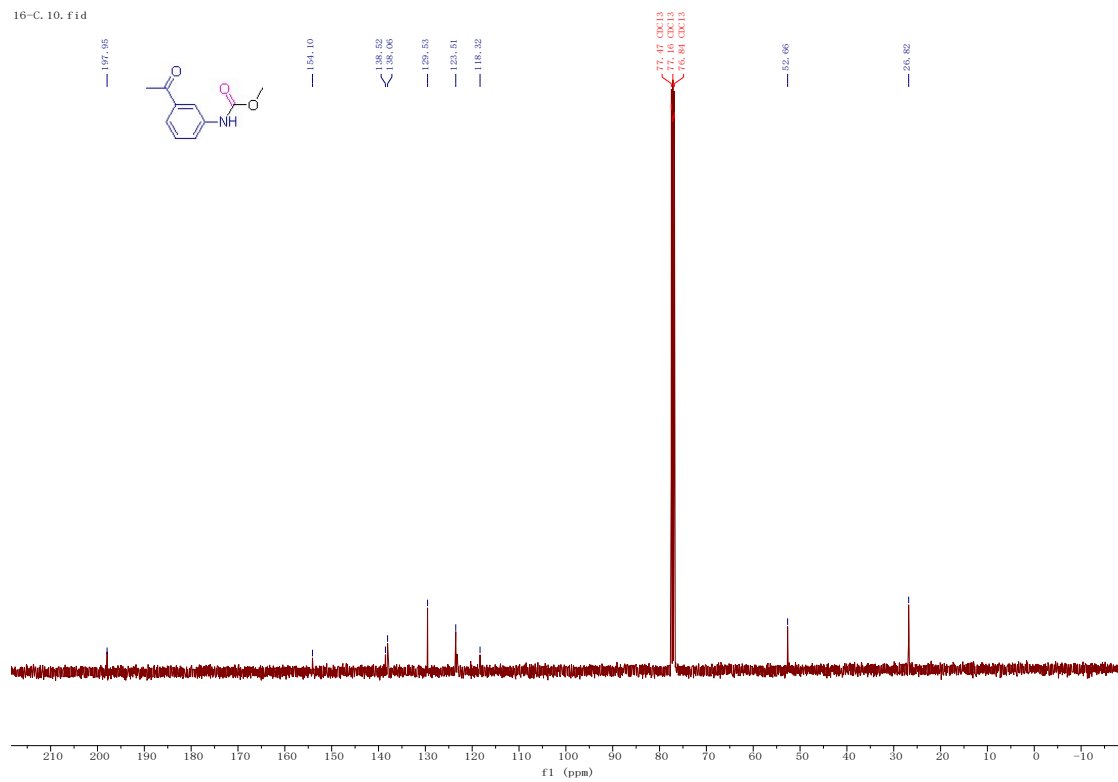

**Figure S29**  $^1\text{H}$  NMR spectrum for compound **3o**

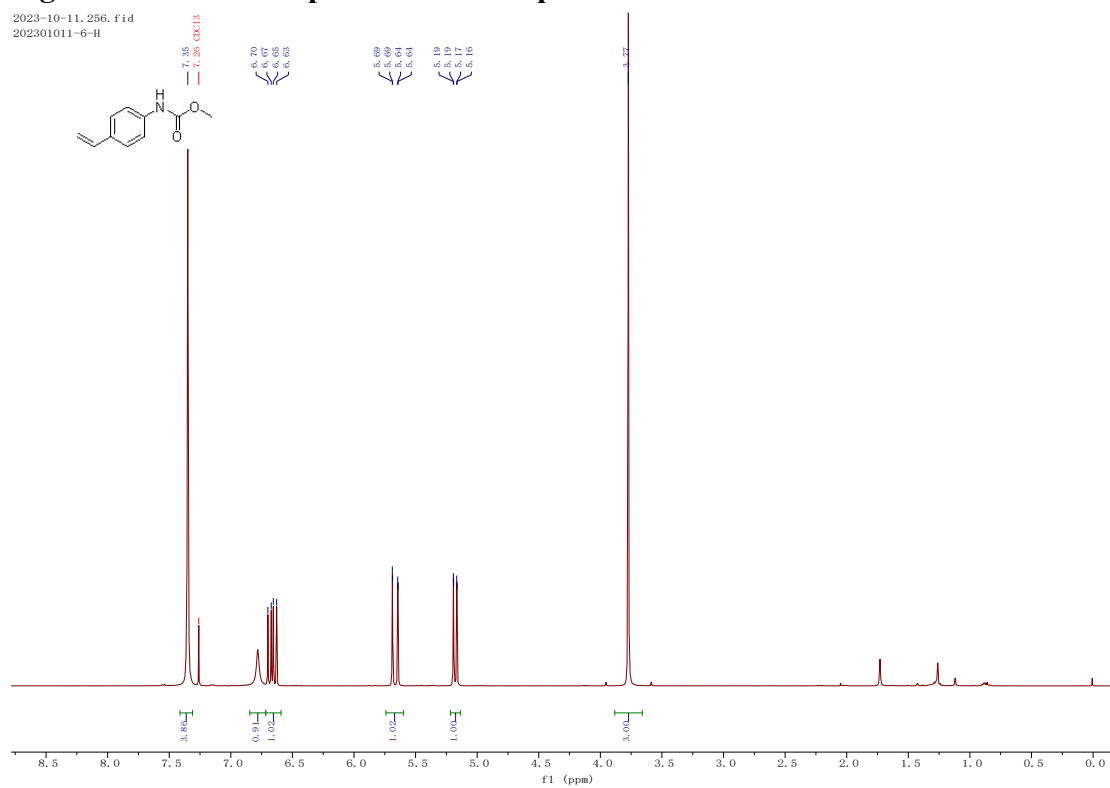

**Figure S30**  $^{13}\text{C}$  NMR spectrum for compound **3o**



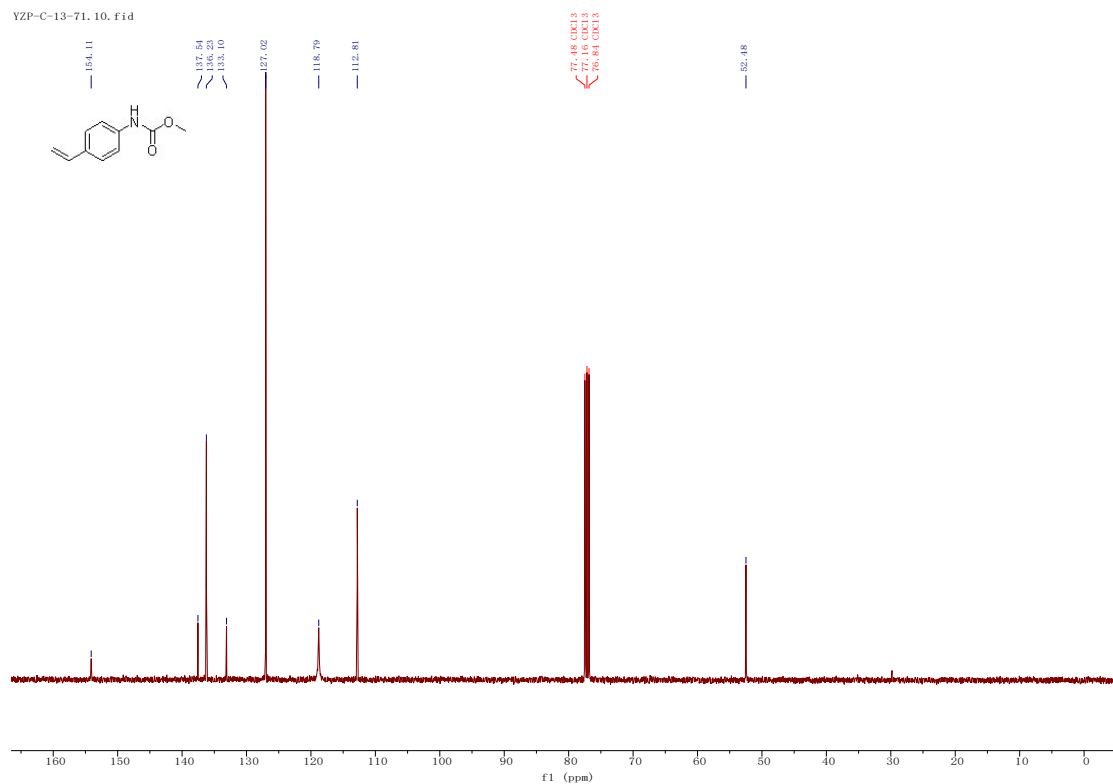

**Figure S31 <sup>1</sup>H NMR spectrum for compound 3p**

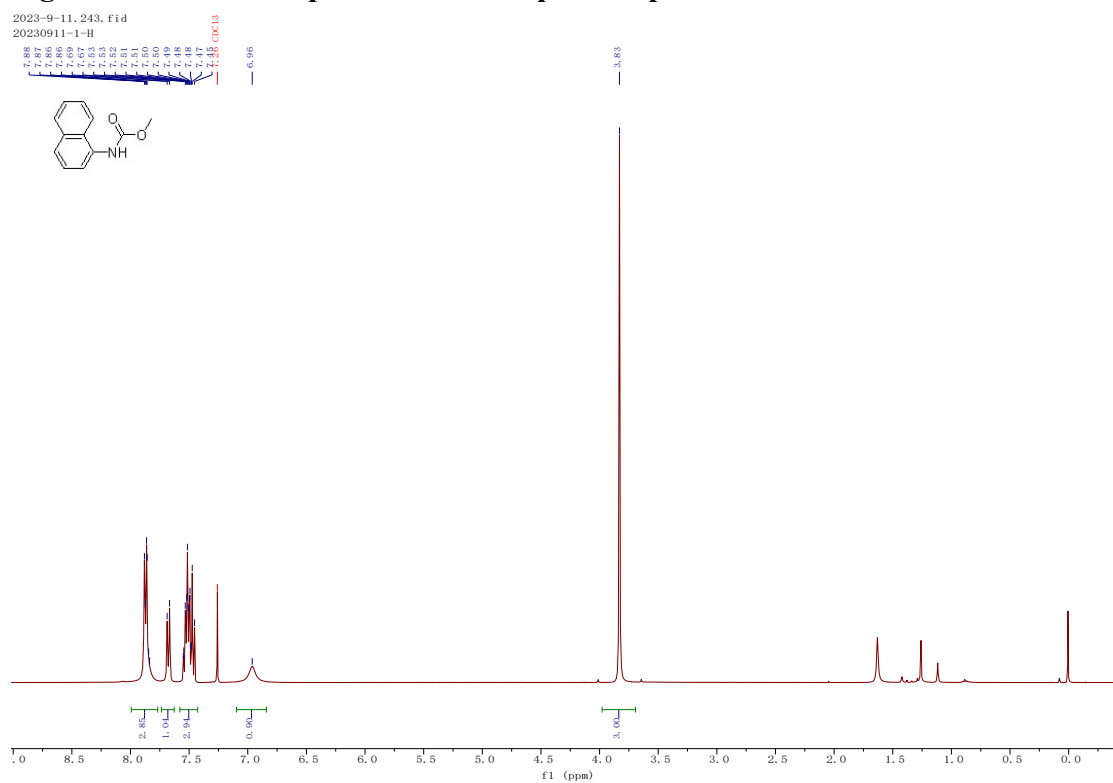



2023-7-21\_207.fid  
20230721-11-H

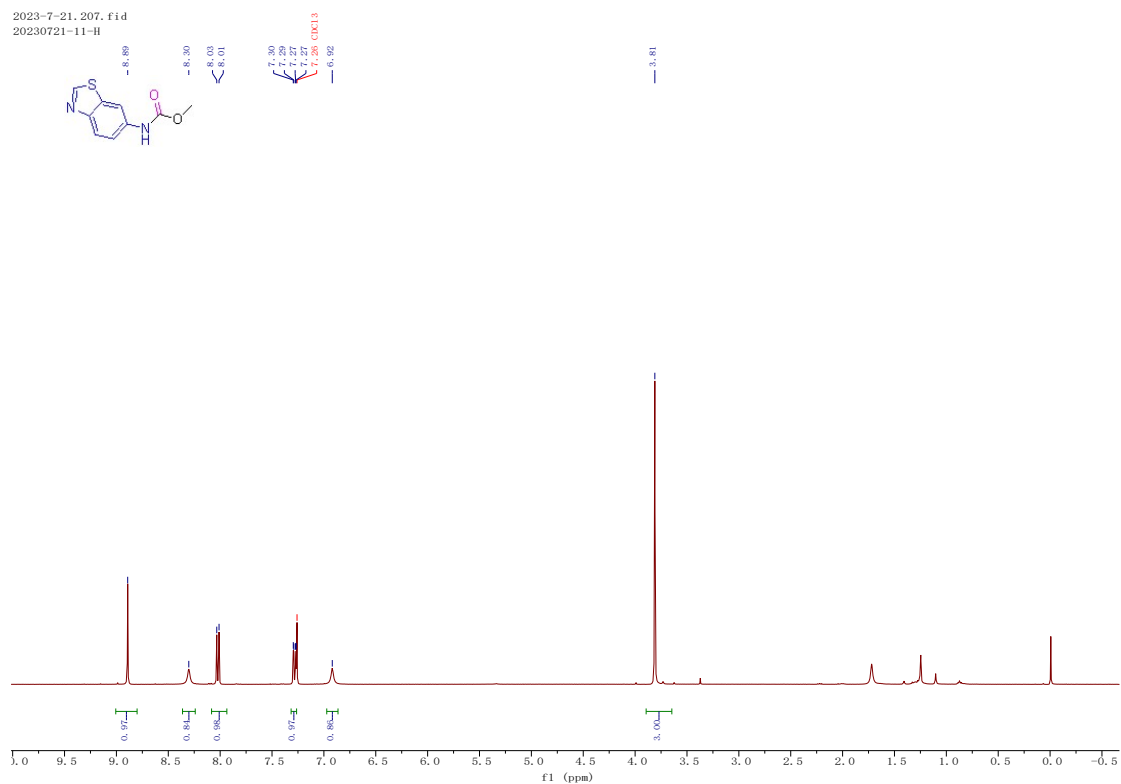

**Figure S34**  $^{13}\text{C}$  NMR spectrum for compound 3q

19-C\_10.fid

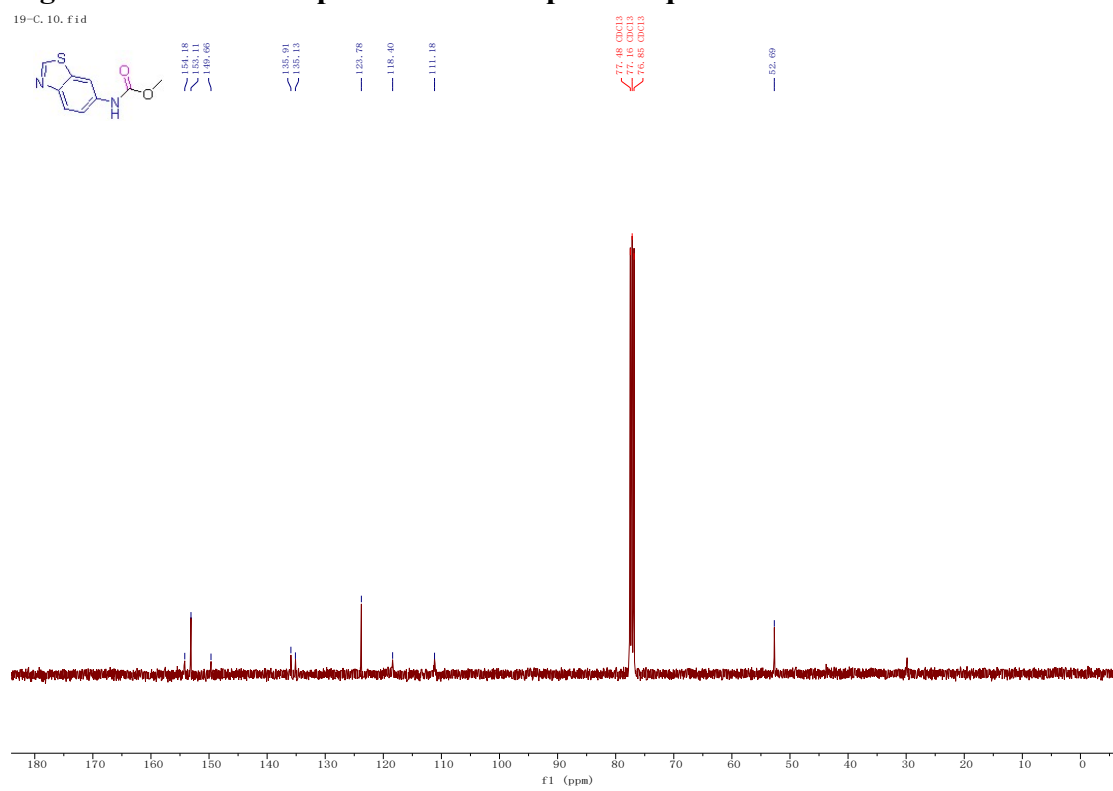

Figure S35 HRMS spectrum for compound 3q

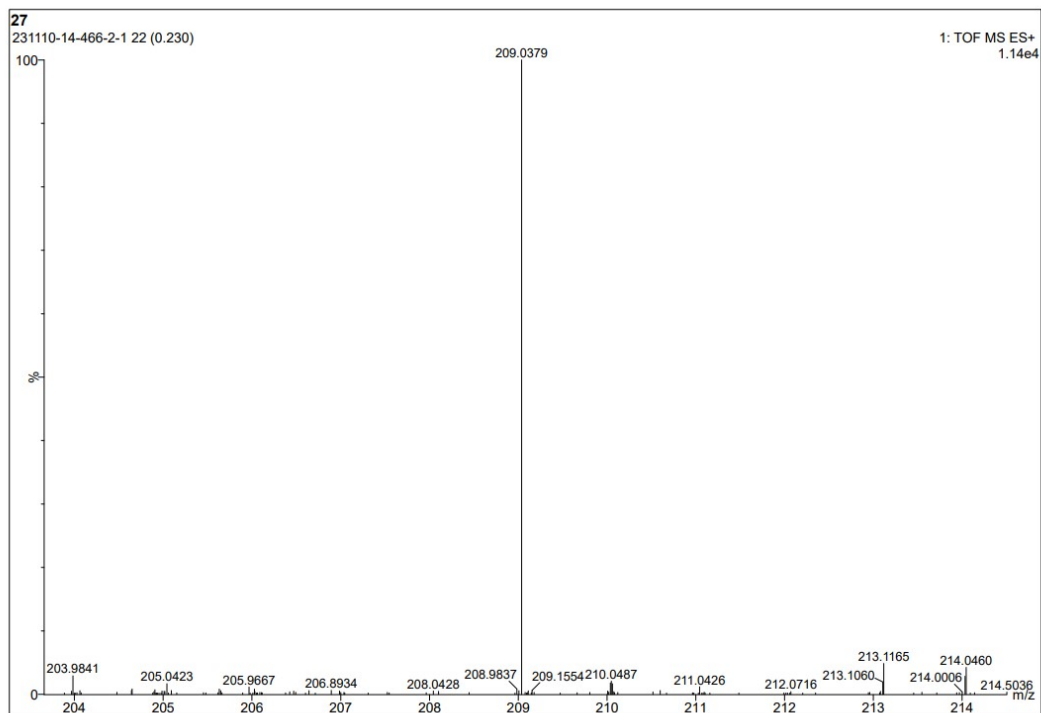

Figure S36 <sup>1</sup>H NMR spectrum for compound 3r

YZP-H-1-54.41.10.fid

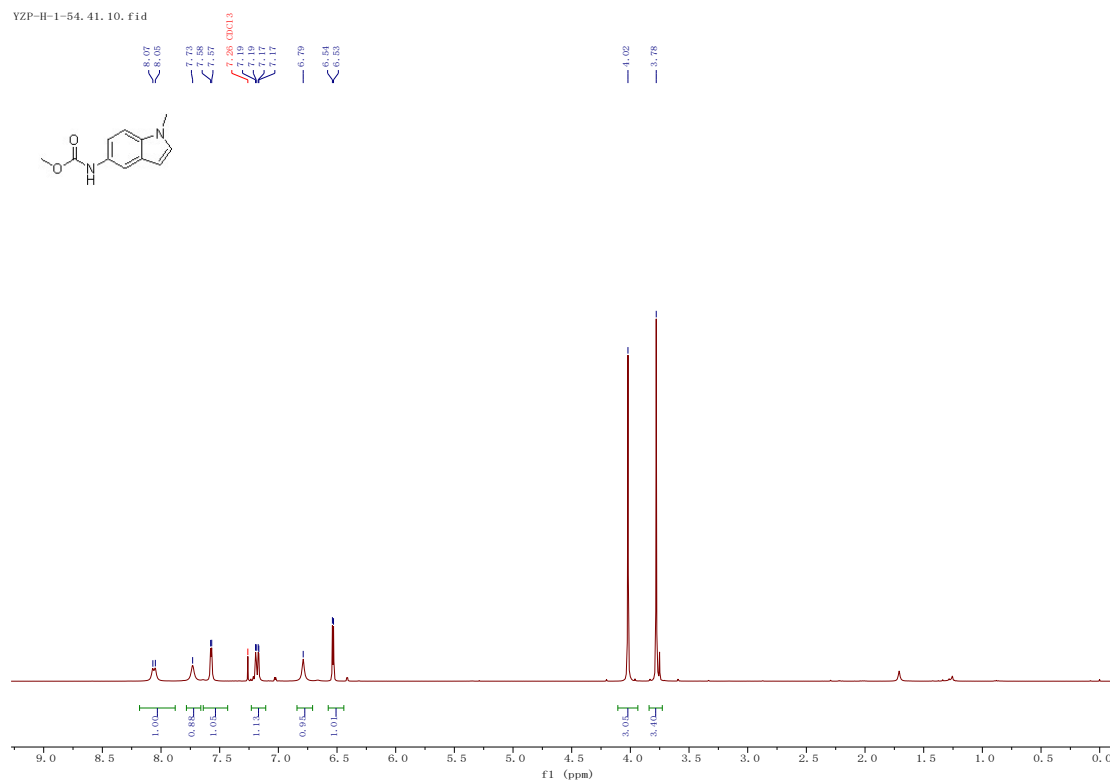

**Figure S37**  $^{13}\text{C}$  NMR spectrum for compound **3r**

YZP-H-1-54, 41, 20, fid

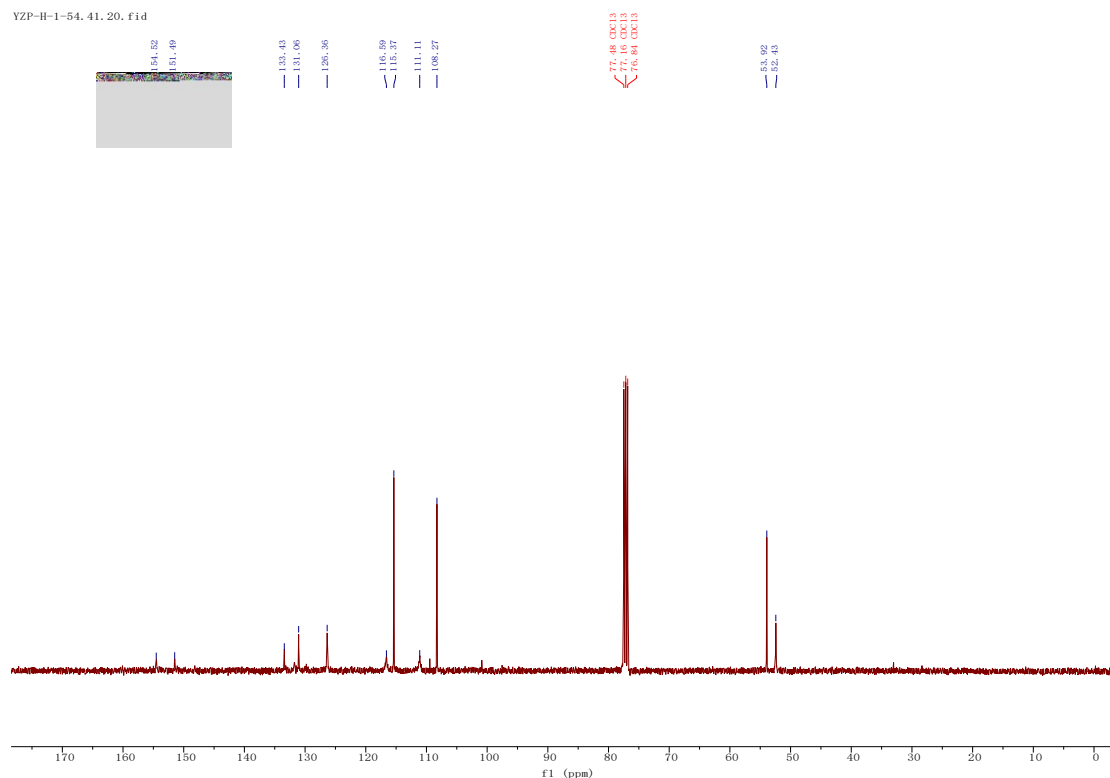

**Figure S38** HRMS spectrum for compound **3r**

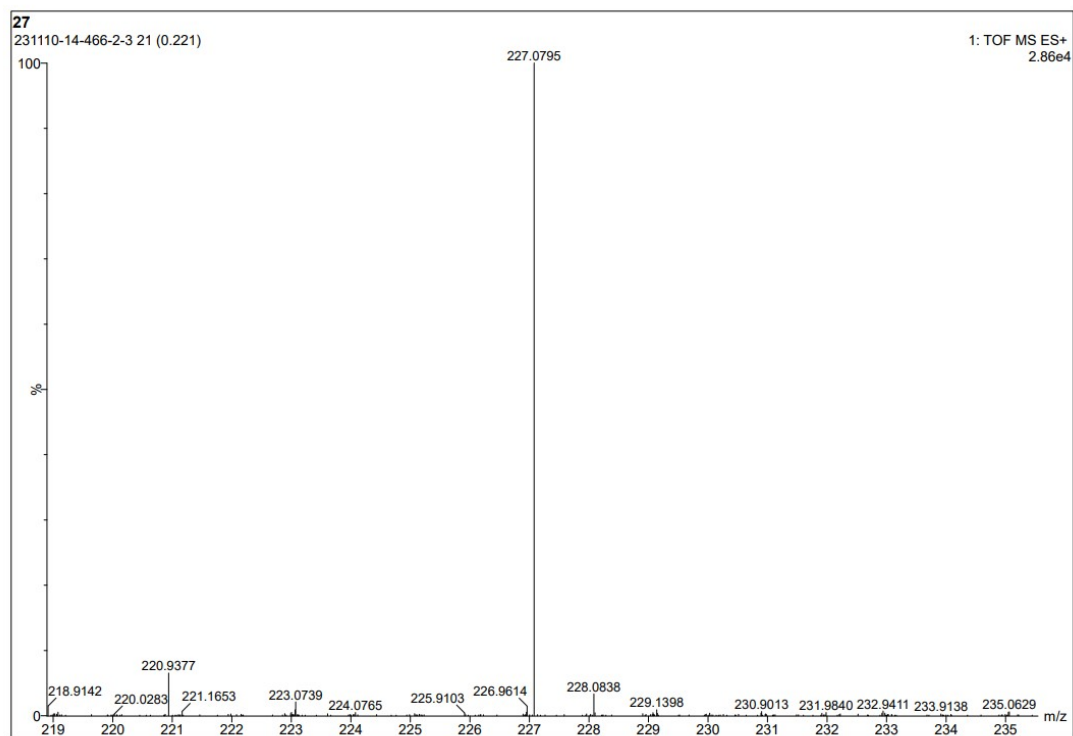

**Figure S39**  $^1\text{H}$  NMR spectrum for compound 3s and 4n

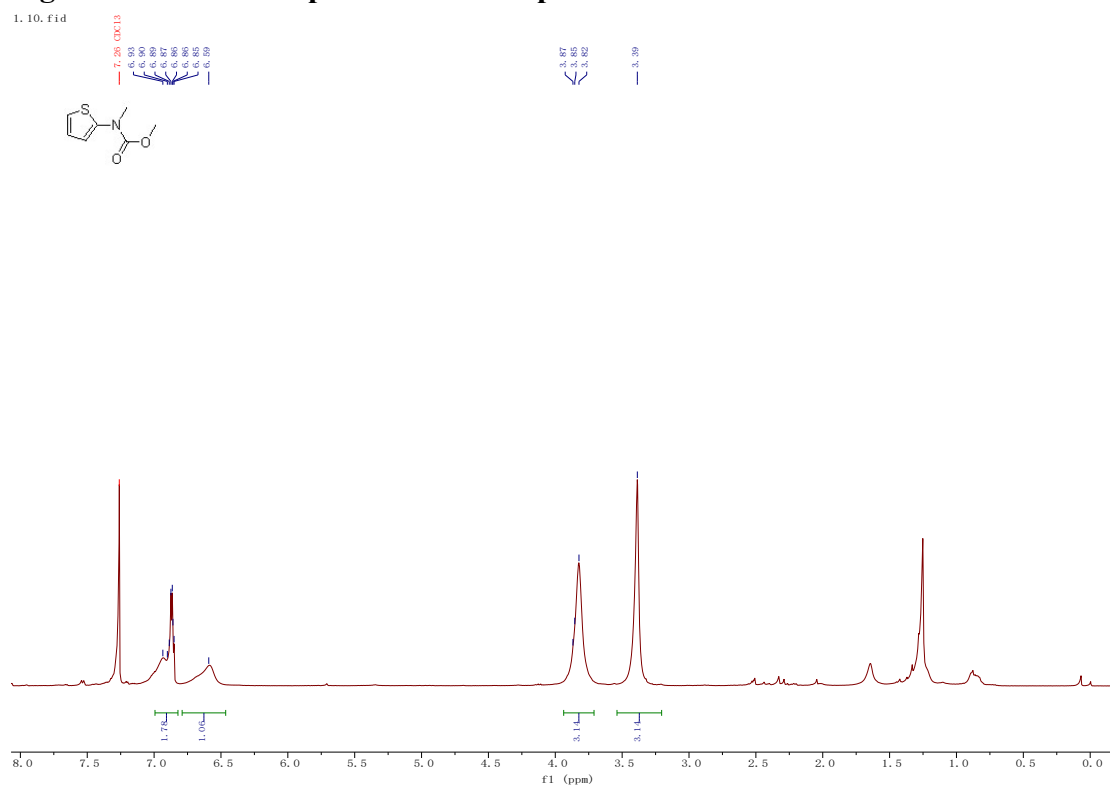

**Figure S40**  $^{13}\text{C}$  NMR spectrum for compound 3s and 4n

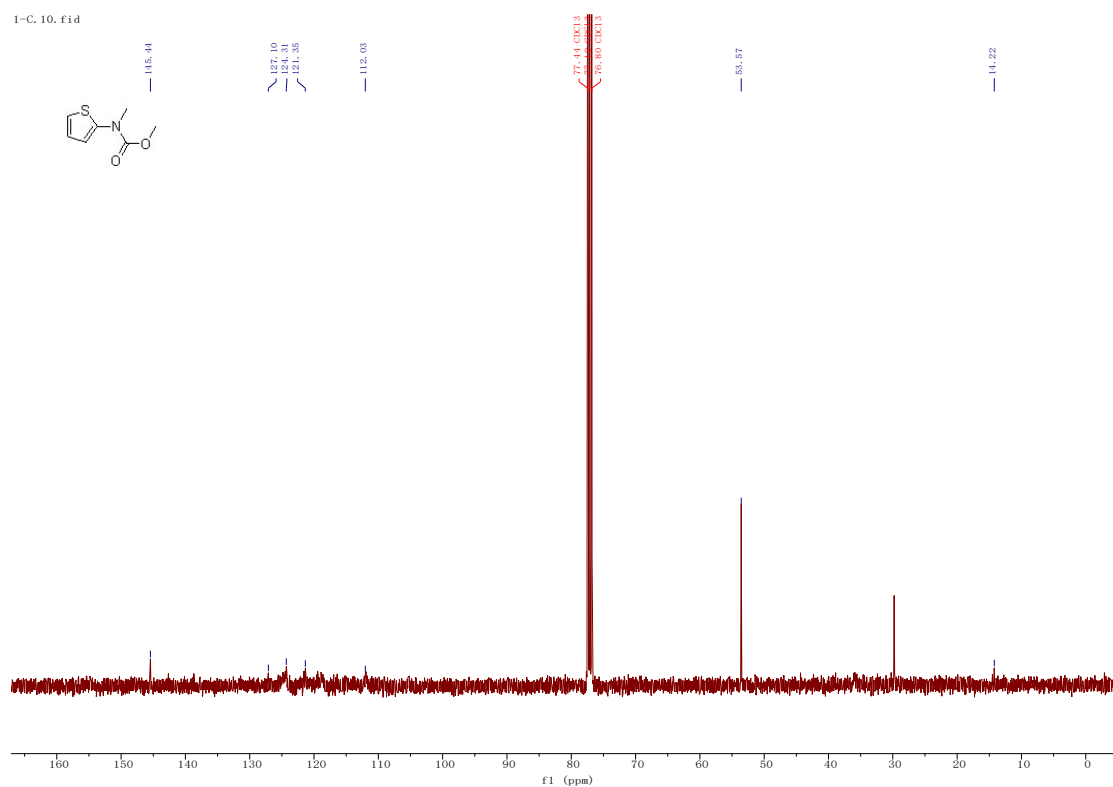

**Figure S41 HRMS spectrum for compound 3s and 4n**

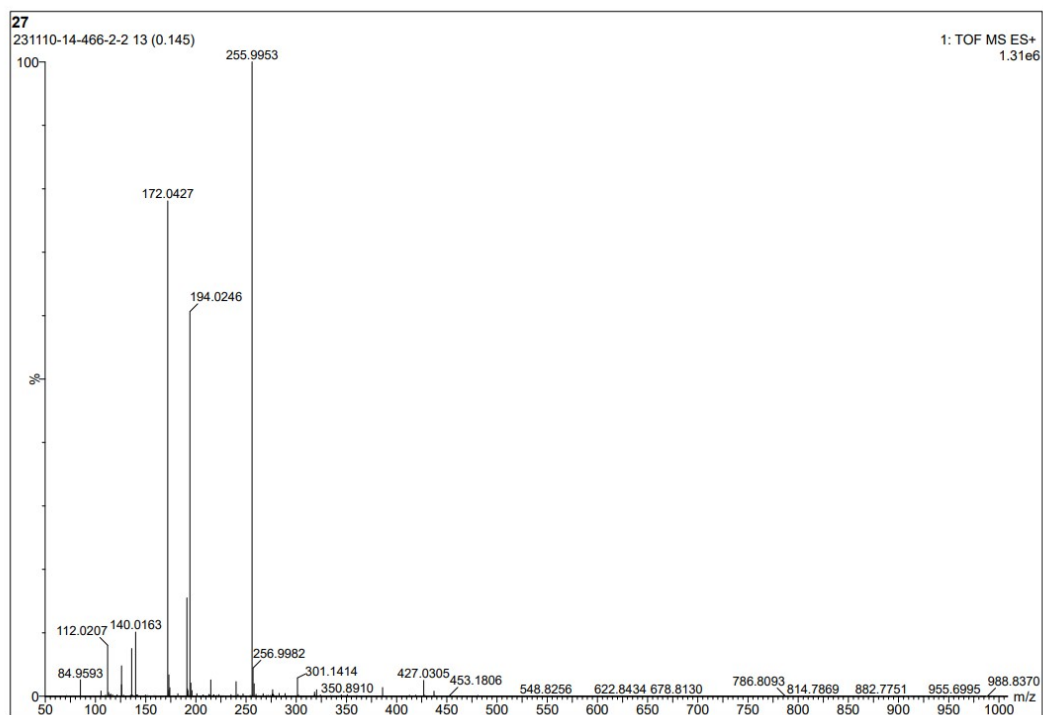

Figure S42 <sup>1</sup>H NMR spectrum for compound 5a

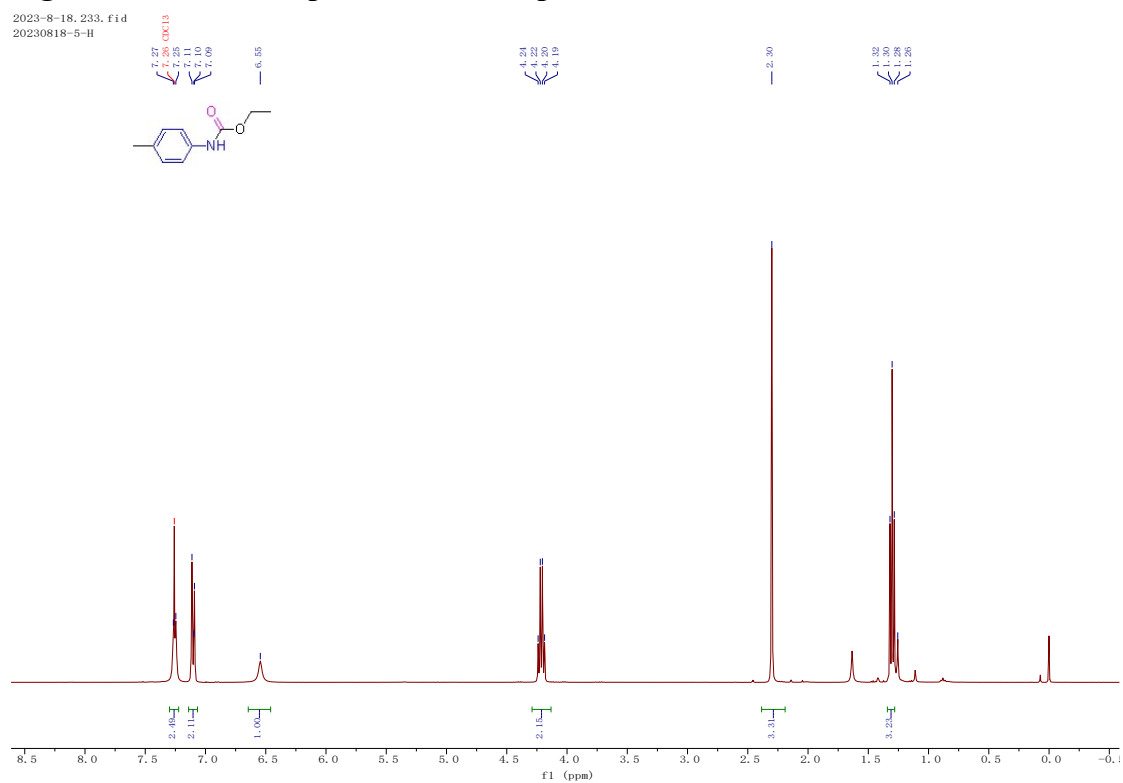

Figure S43 <sup>13</sup>C NMR spectrum for compound 5a

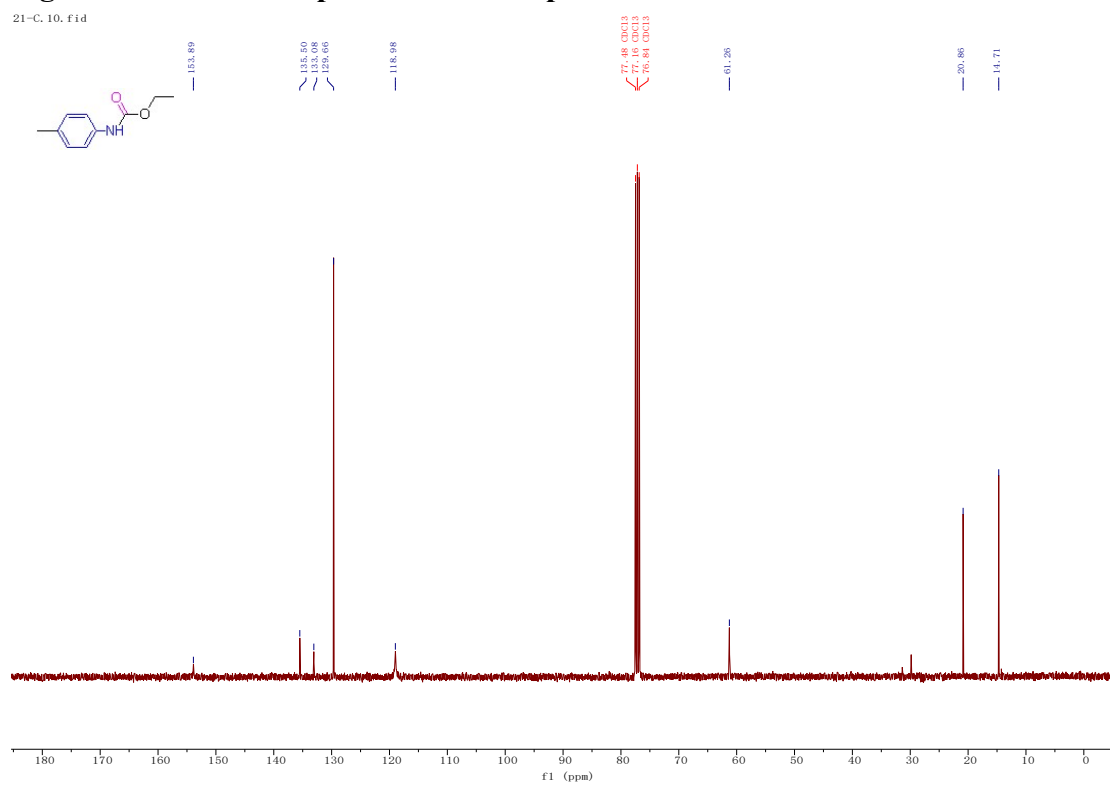



**Figure S44**  $^1\text{H}$  NMR spectrum for compound **4a**

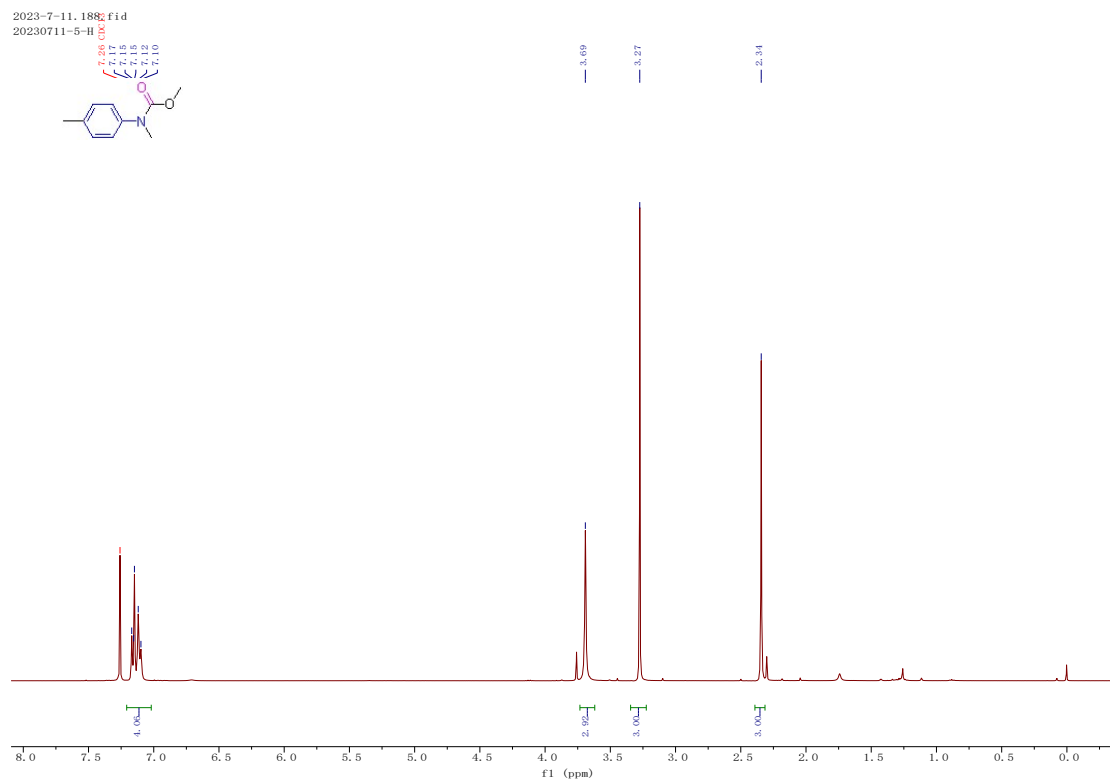

**Figure S45**  $^{13}\text{C}$  NMR spectrum for compound **4a**

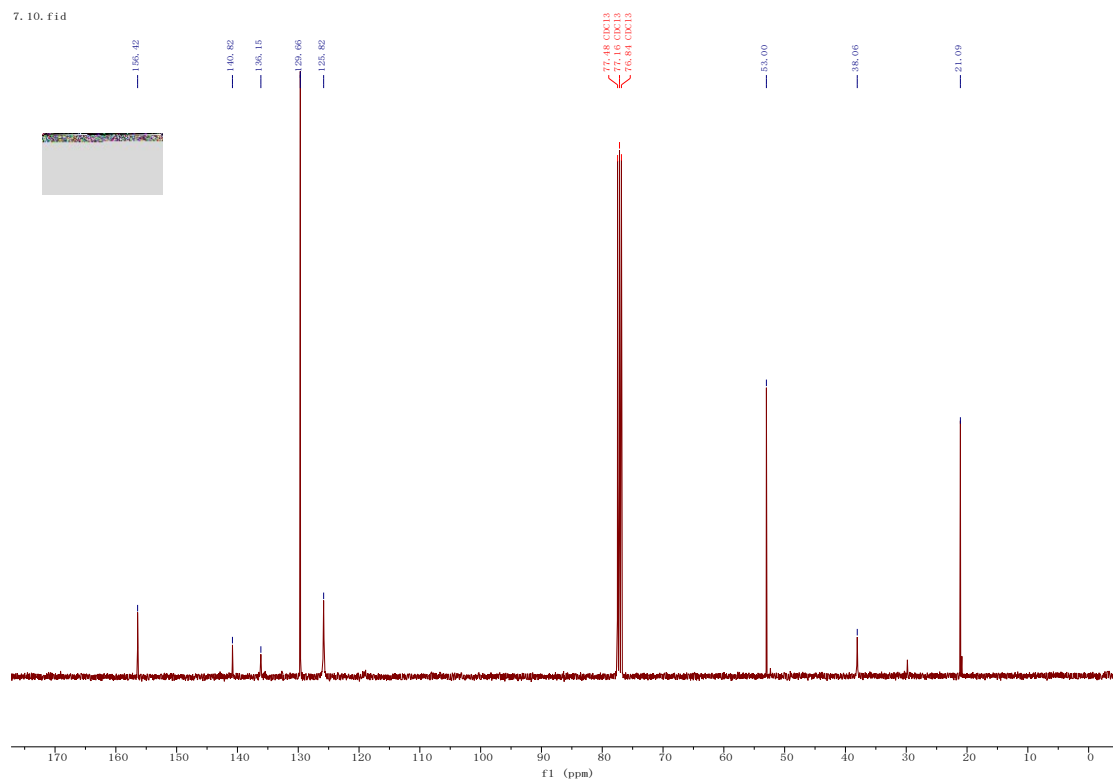

**Figure S46 HRMS spectrum for compound 4a**

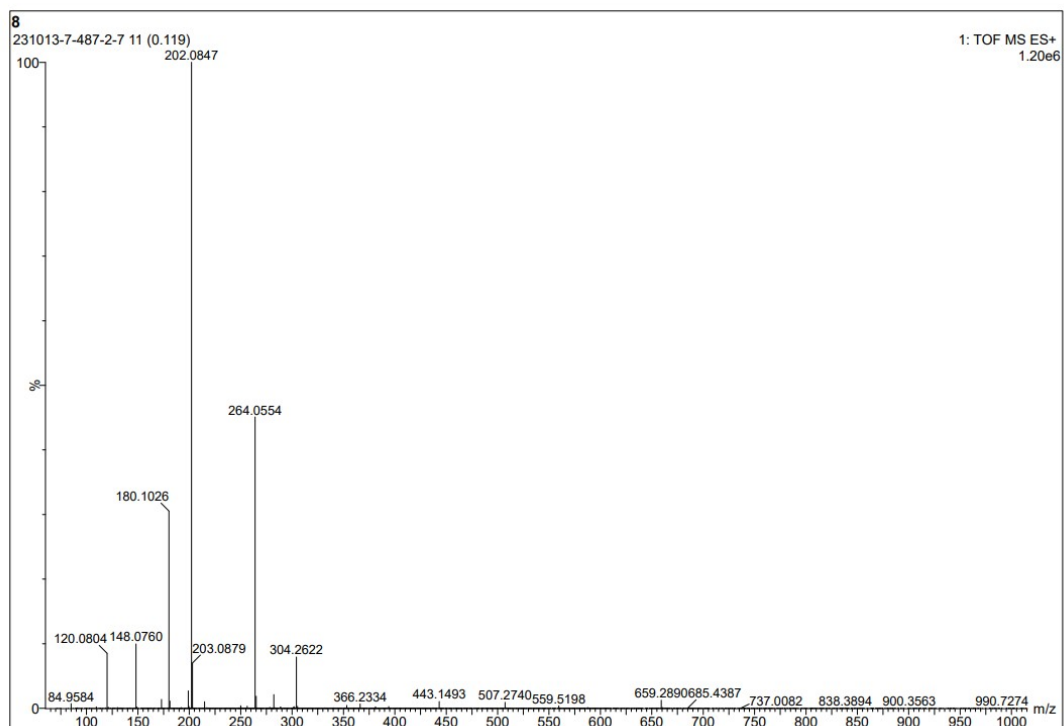

Figure S47 <sup>1</sup>H NMR spectrum for compound 4b

2023-8-18, 240, fid  
20230818-12-H

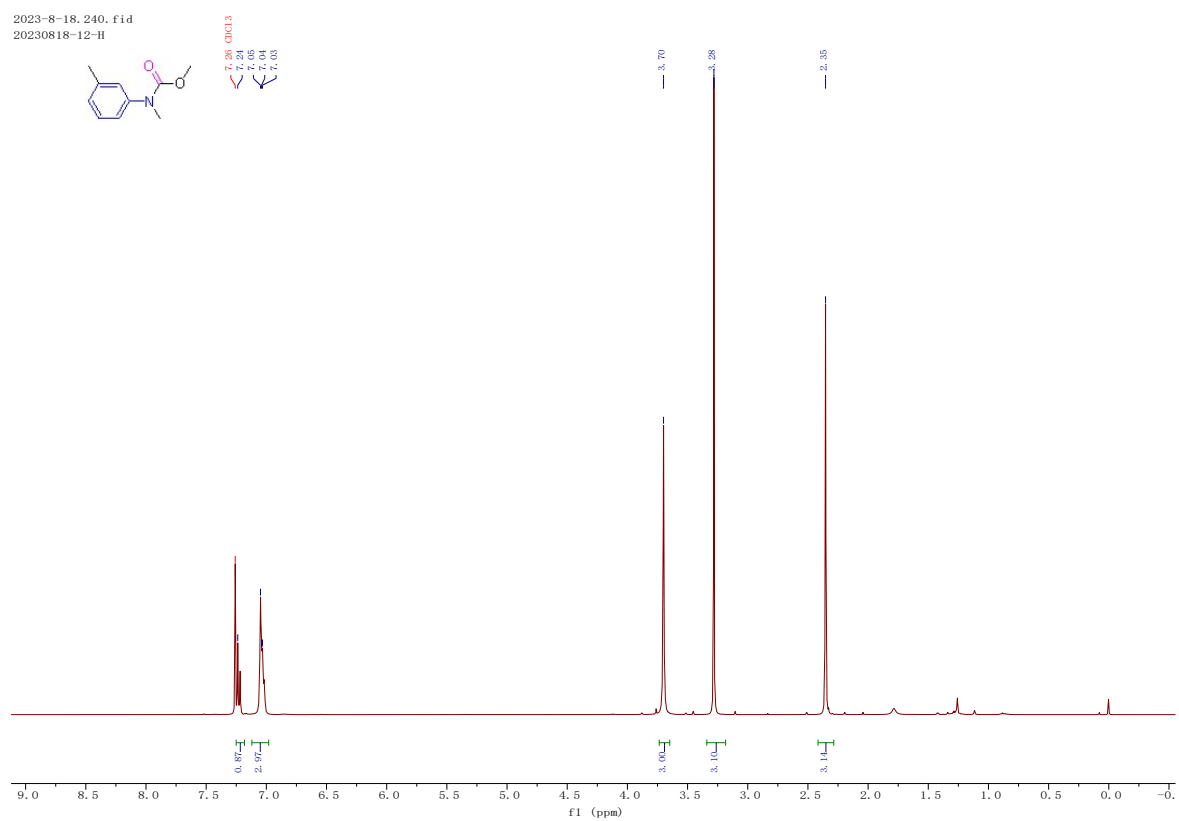

Figure S48 <sup>13</sup>C NMR spectrum for compound 4b

27-C, 10, fid

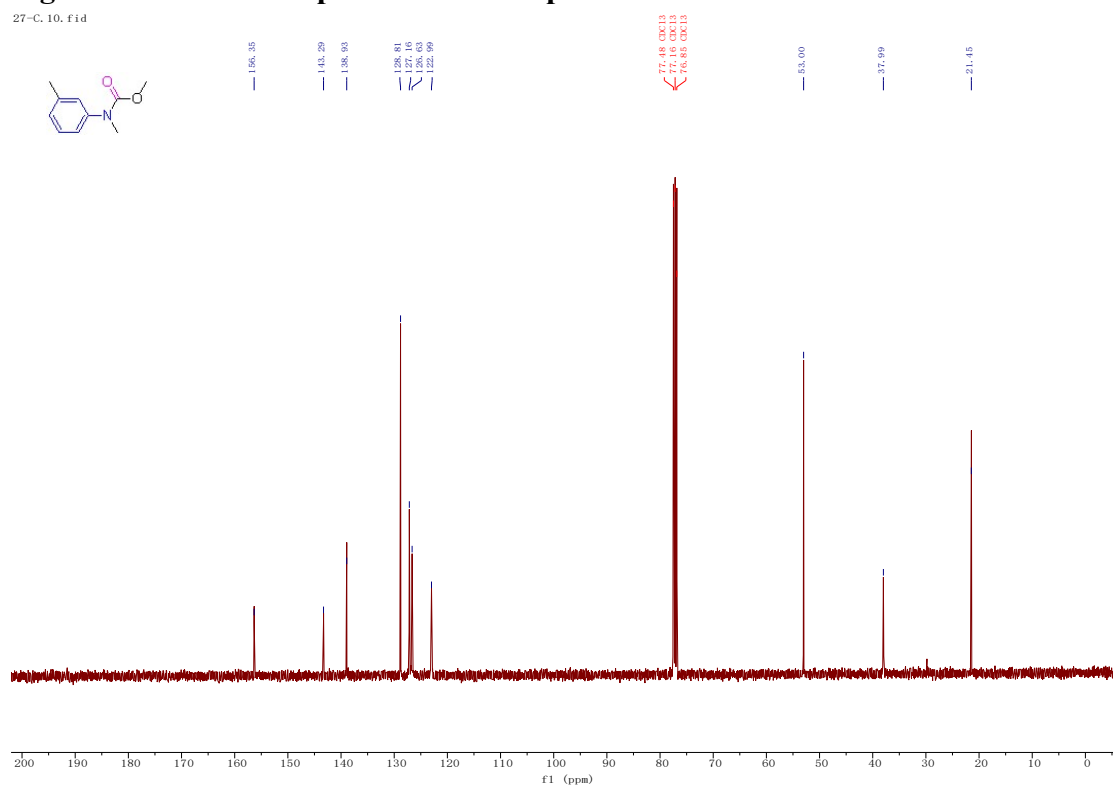

**Figure S49**  $^1\text{H}$  NMR spectrum for compound **4c**

2023-8-18. 237. fid  
20230818-9-H

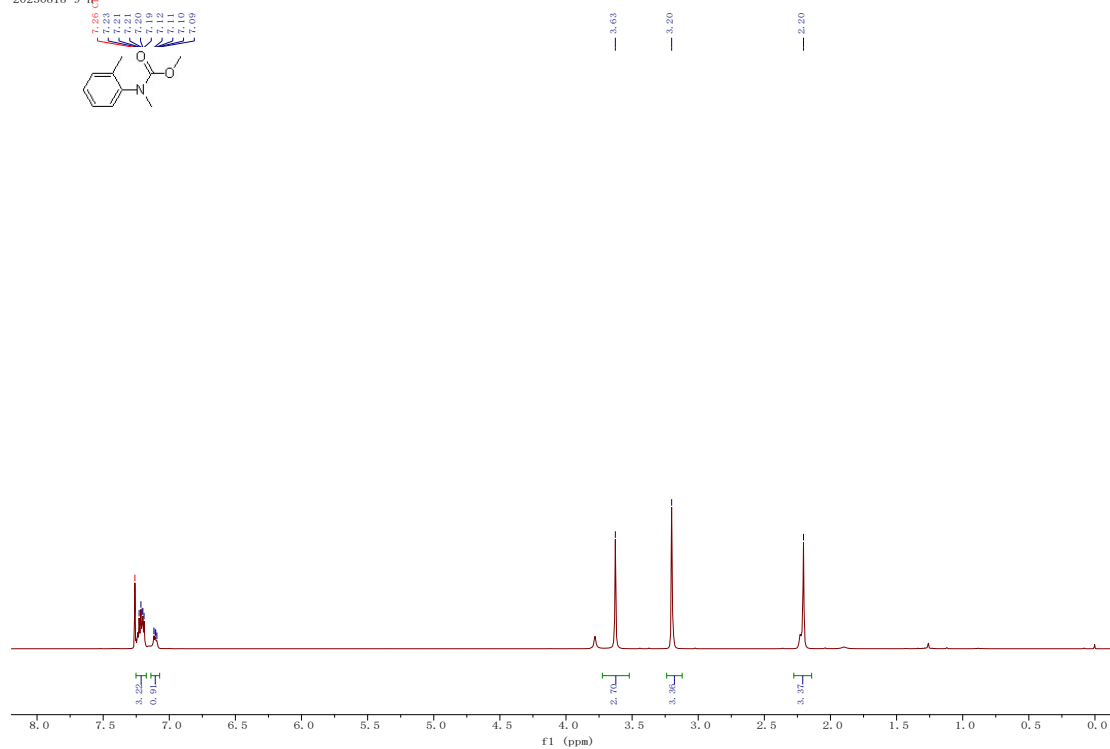

**Figure S50**  $^{13}\text{C}$  NMR spectrum for compound **4c**

24-C. 10. fid

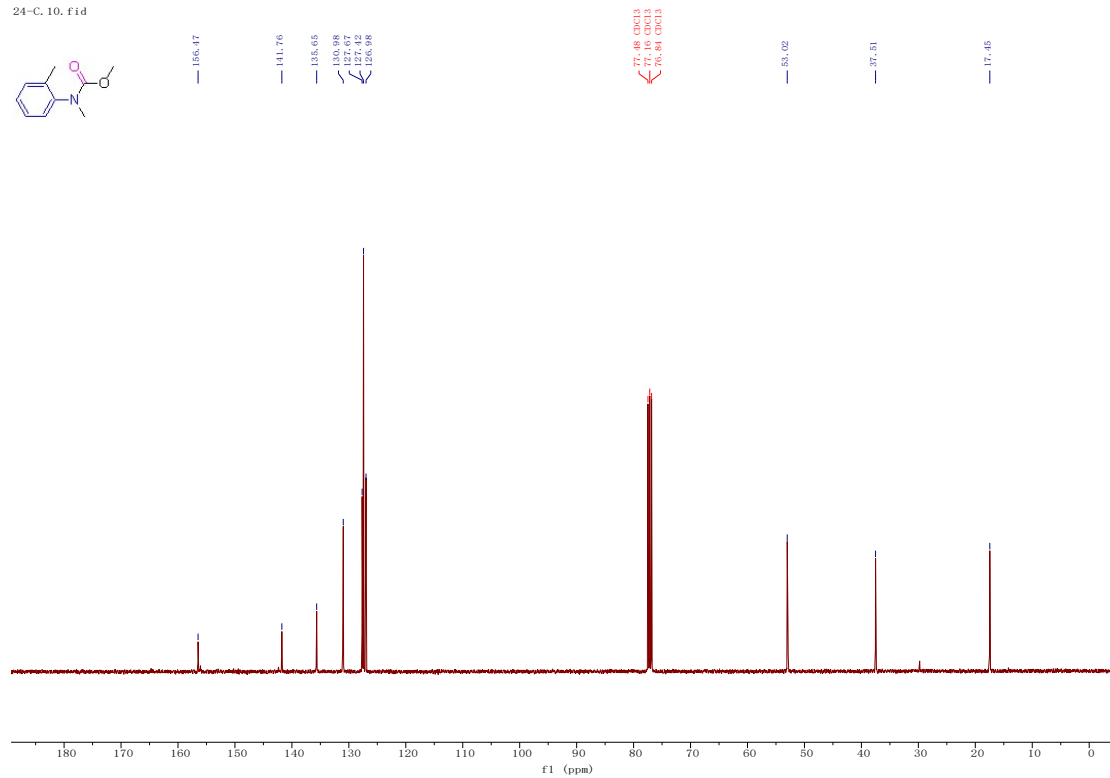

**Figure S51**  $^1\text{H}$  NMR spectrum for compound **4d**

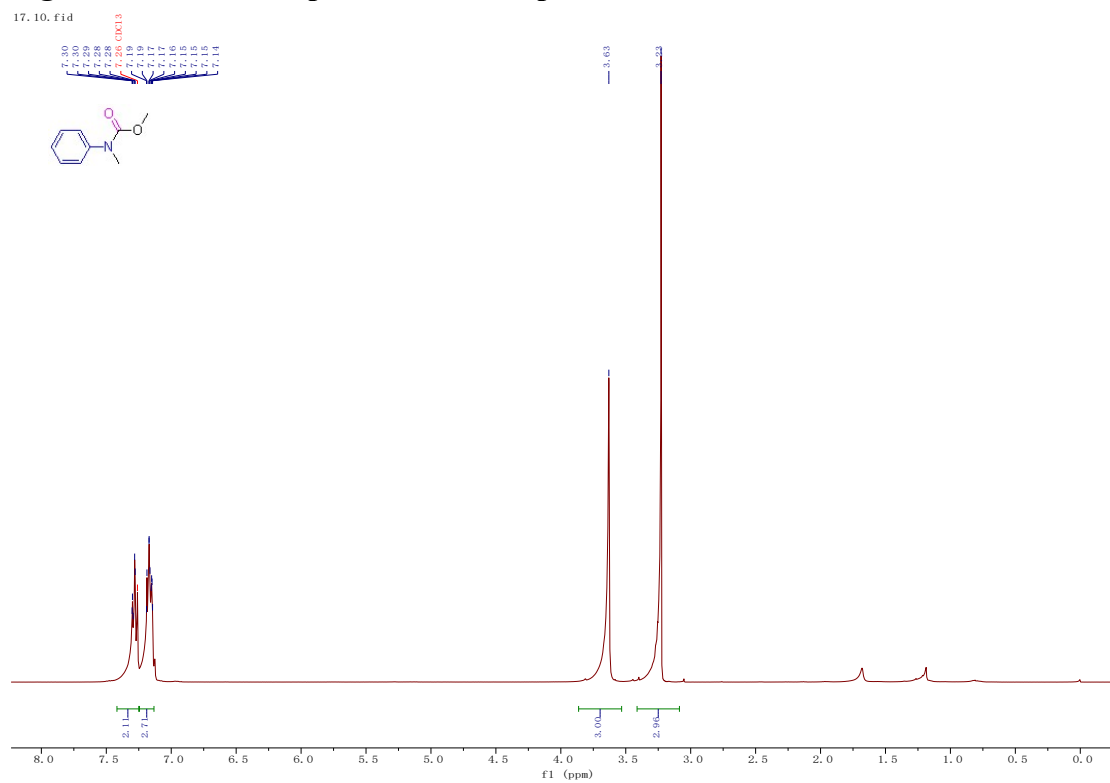

**Figure S52**  $^{13}\text{C}$  NMR spectrum for compound **4d**

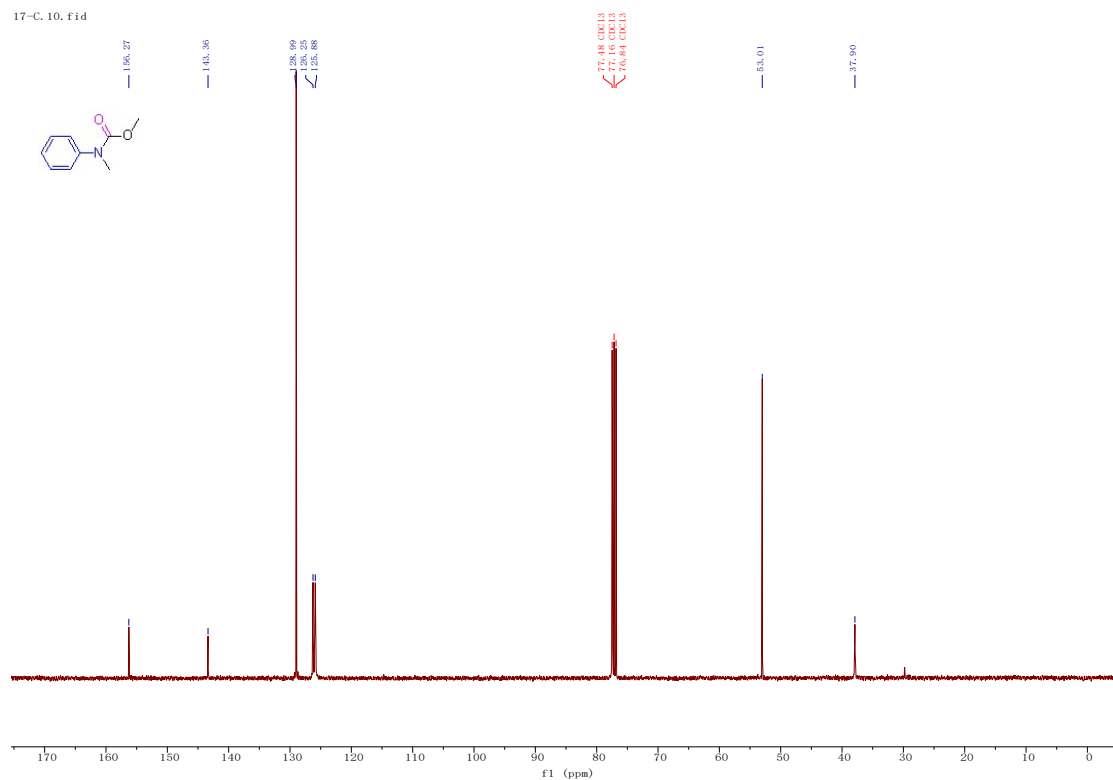

**Figure S53 <sup>1</sup>H NMR spectrum for compound 4e and 4o**

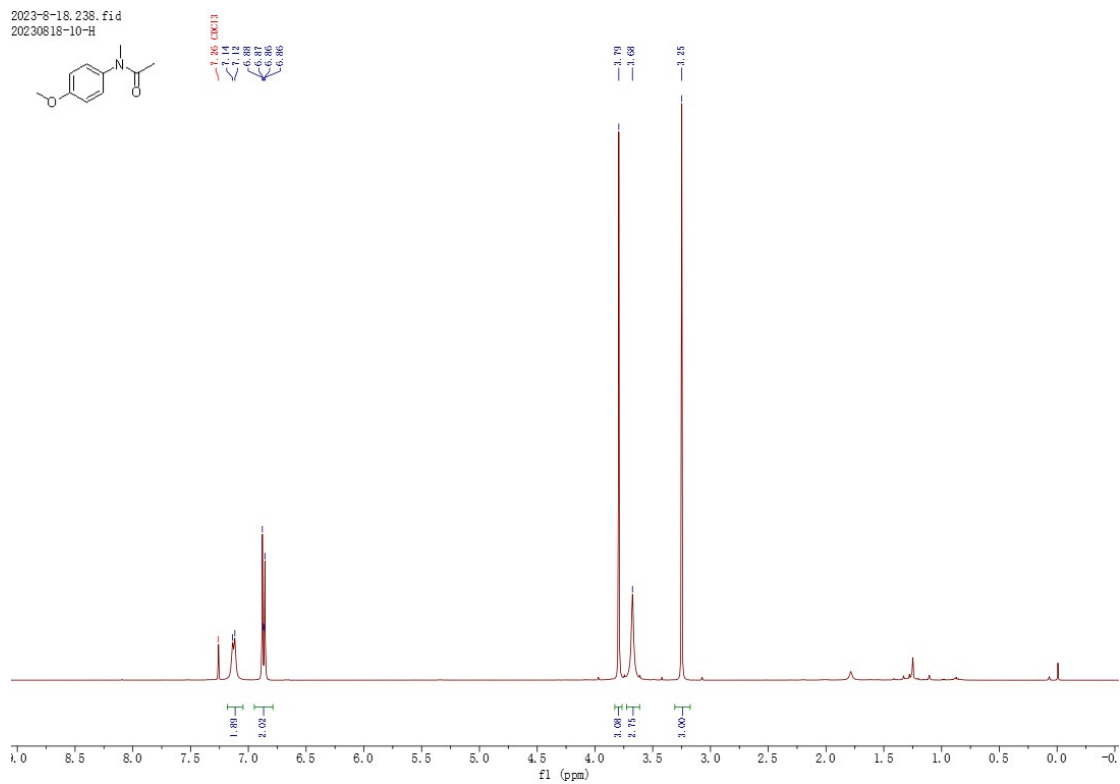

Figure S54 <sup>13</sup>C NMR spectrum for compound 4e and 4o

25-C.10.fid

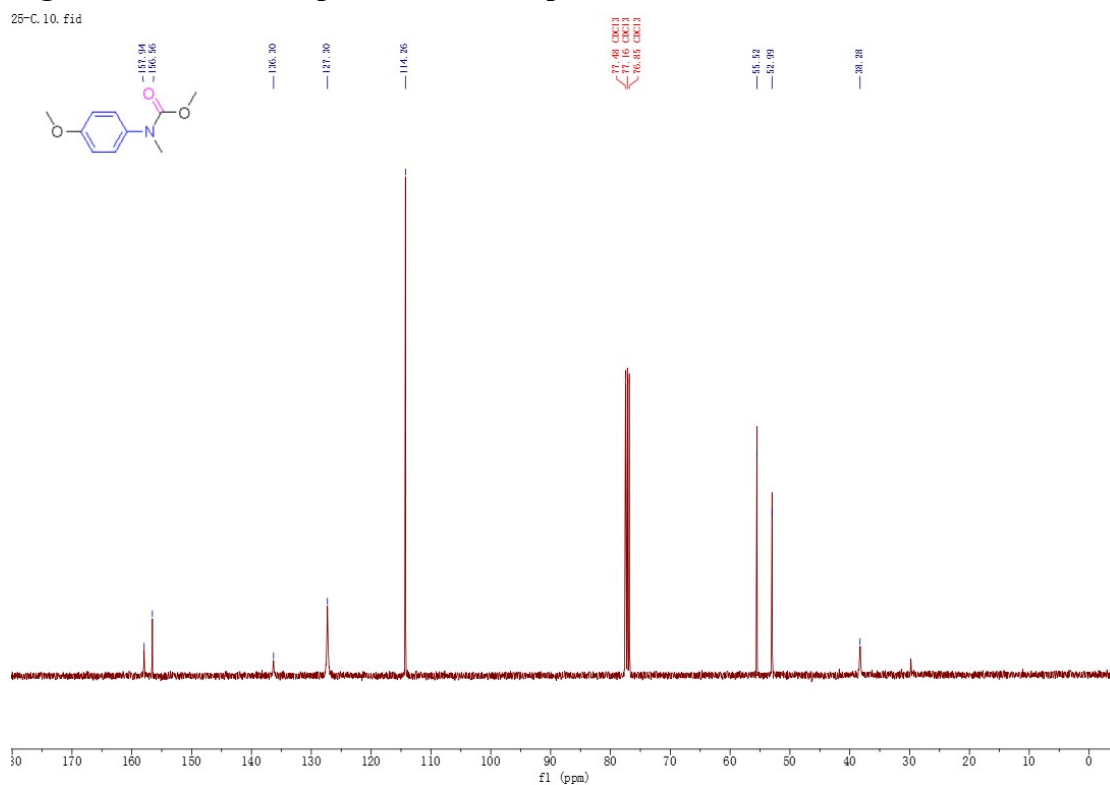

Figure S55 <sup>1</sup>H NMR spectrum for compound 4f

6.10.fid

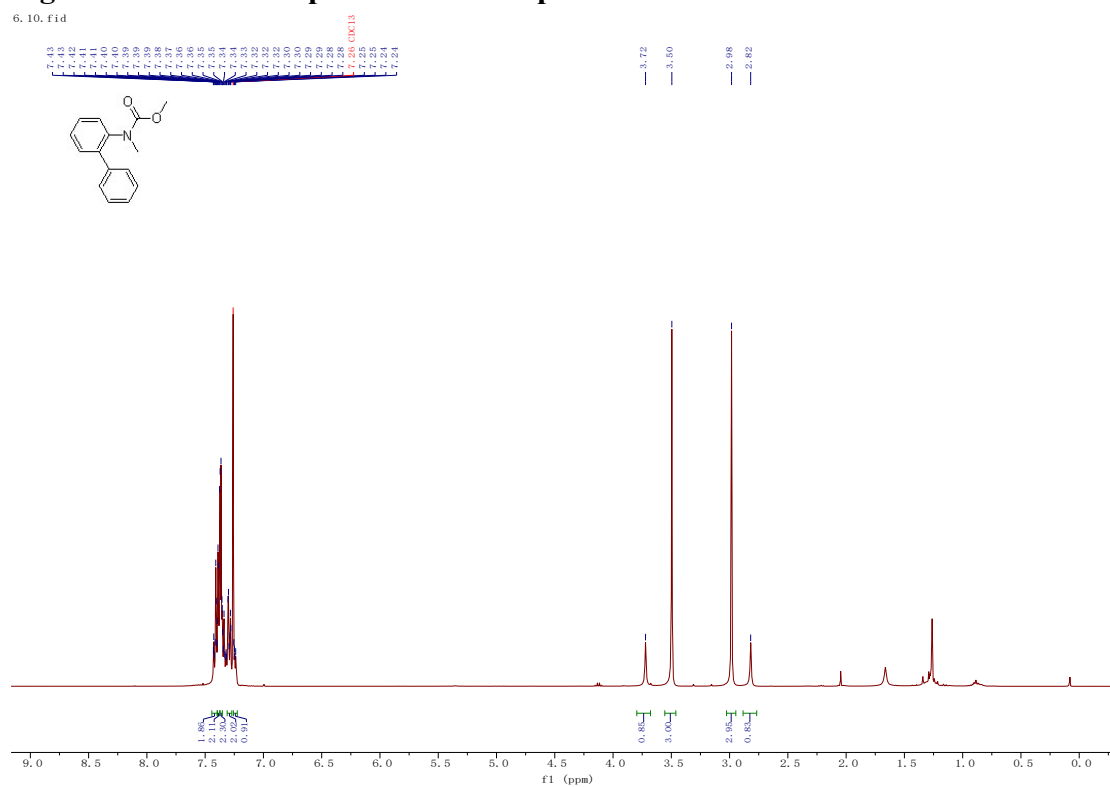

**Figure S56**  $^{13}\text{C}$  NMR spectrum for compound **4f**

YZP-6-C. 10. fid

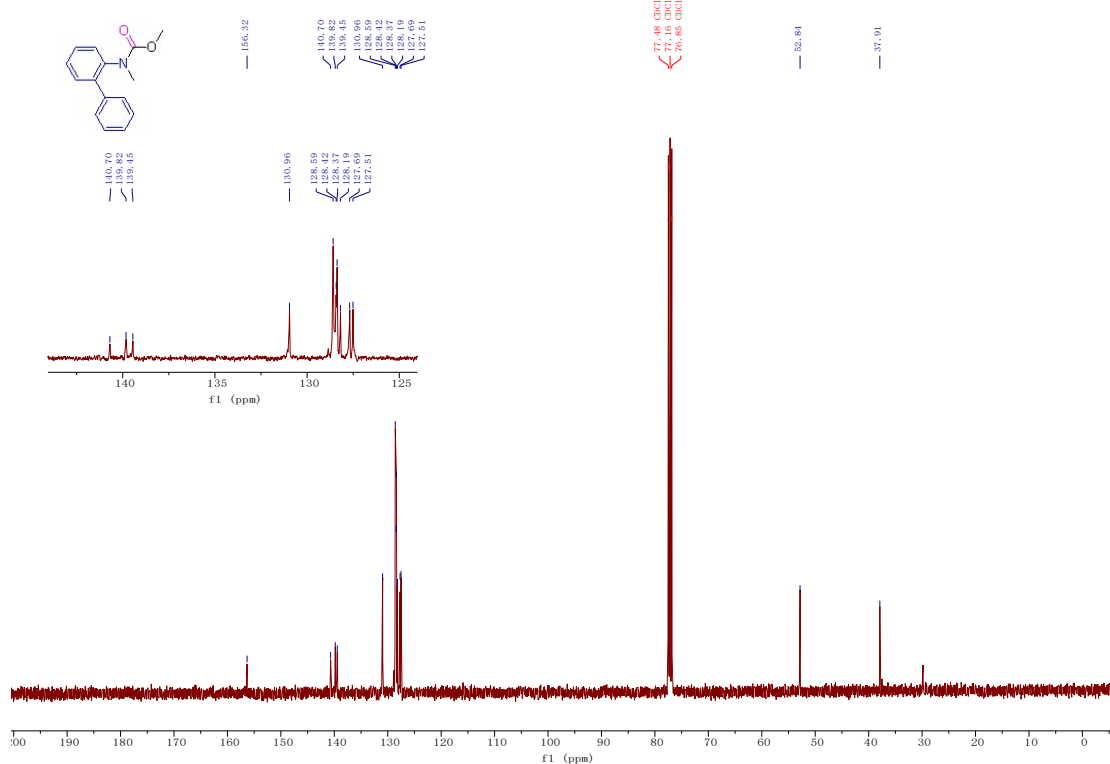

**Figure S57**  $^1\text{H}$  NMR spectrum for compound **4g**

23. 10. fid

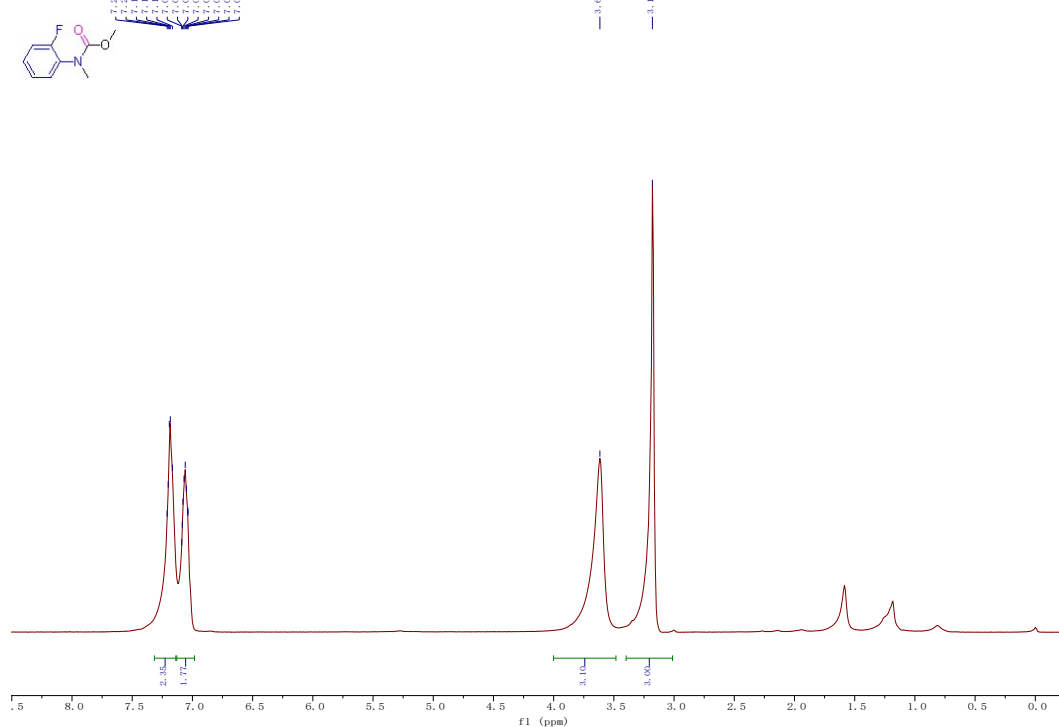



**Figure S58  $^{13}\text{C}$  NMR spectrum for compound 4g**

23-C\_10.fid

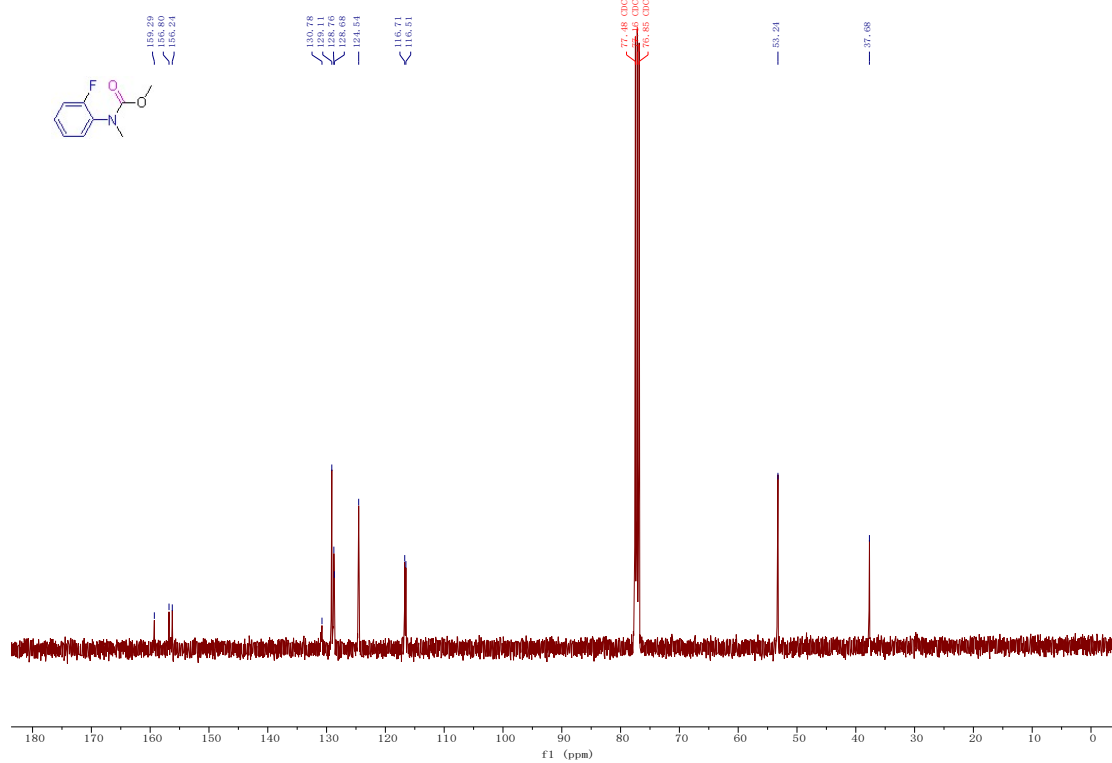

**Figure S59  $^{19}\text{F}$  NMR spectrum for compound 4g**

2023-10-11.250.fid  
20231011-1-F

-1.61. br

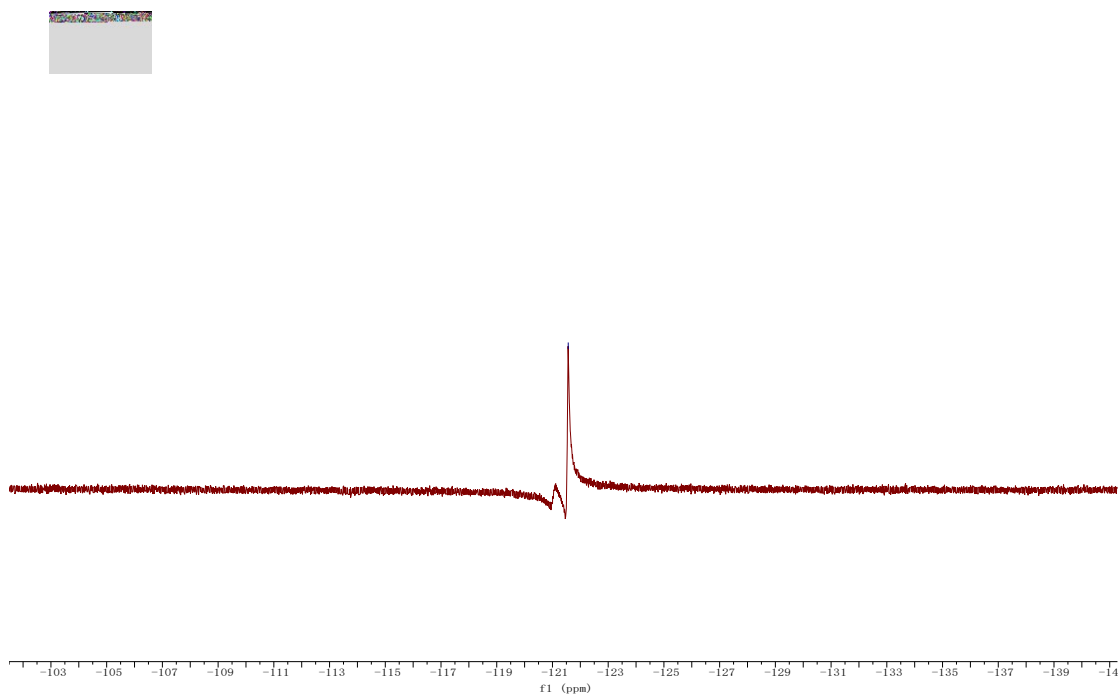

**Figure S60 HRMS spectrum for compound 4g and 4h**

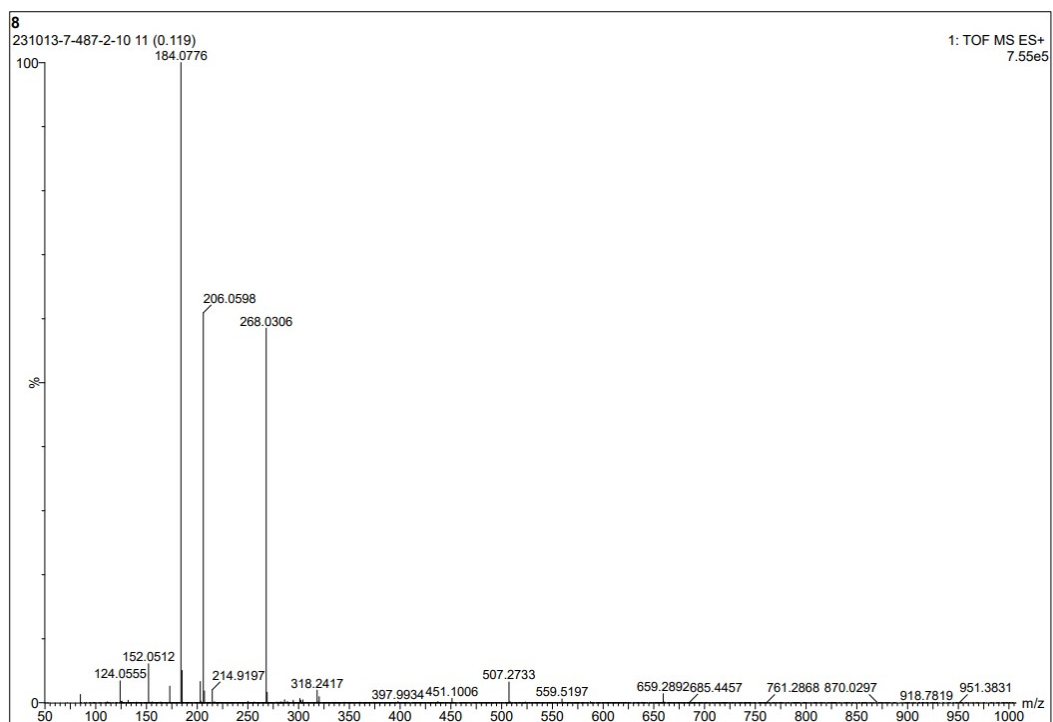

**Figure S61 <sup>1</sup>H NMR spectrum for compound 4h**

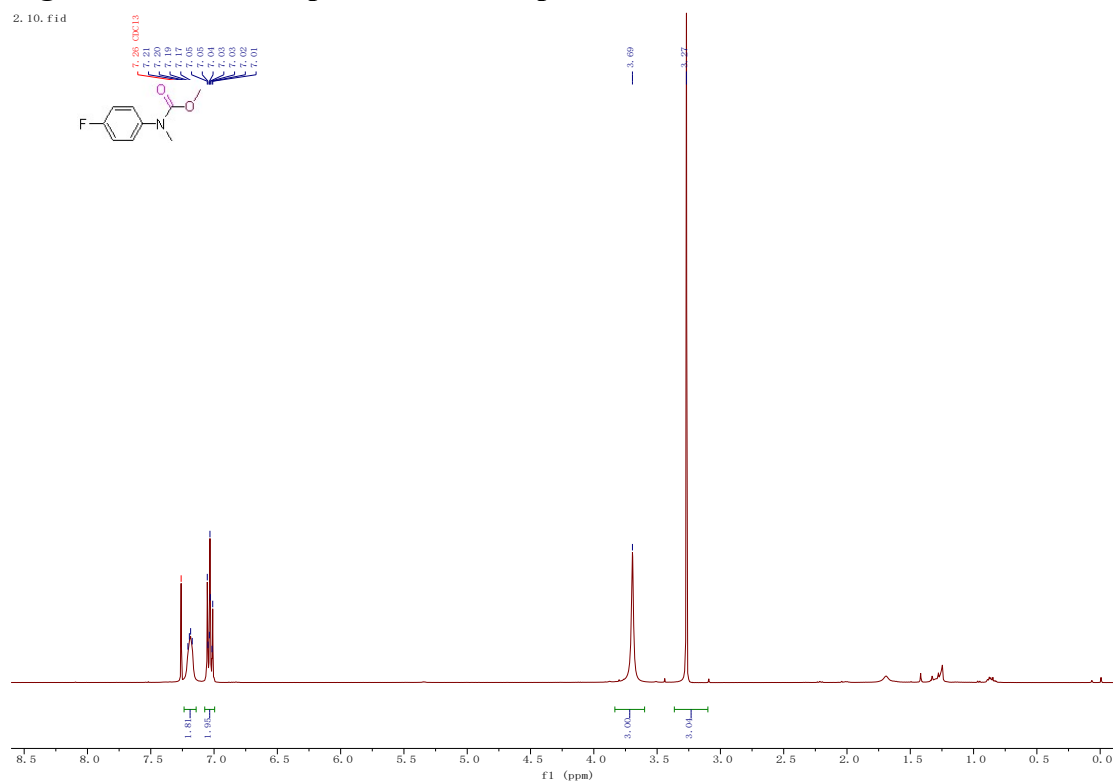

**Figure S62 <sup>13</sup>C NMR spectrum for compound 4h**

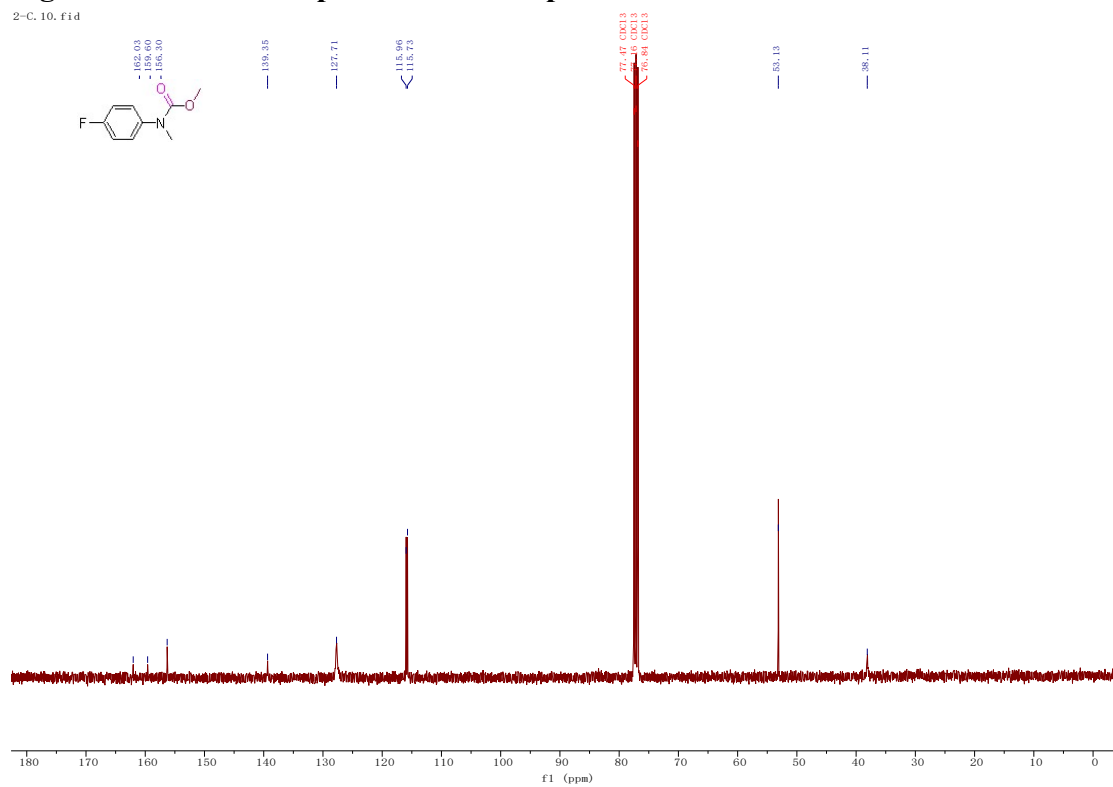

**Figure S63  $^{19}\text{F}$  NMR spectrum for compound 4h**

2-F\_10.fid

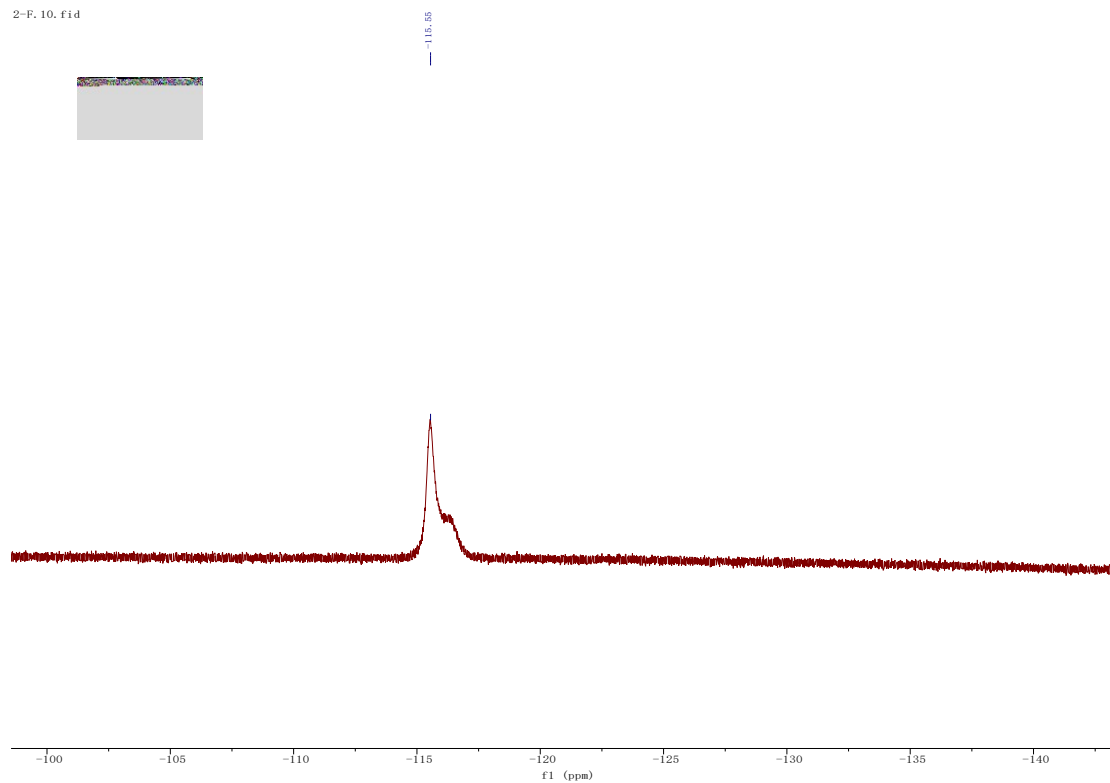

**Figure S64  $^1\text{H}$  NMR spectrum for compound 4i**

18. 10. fid

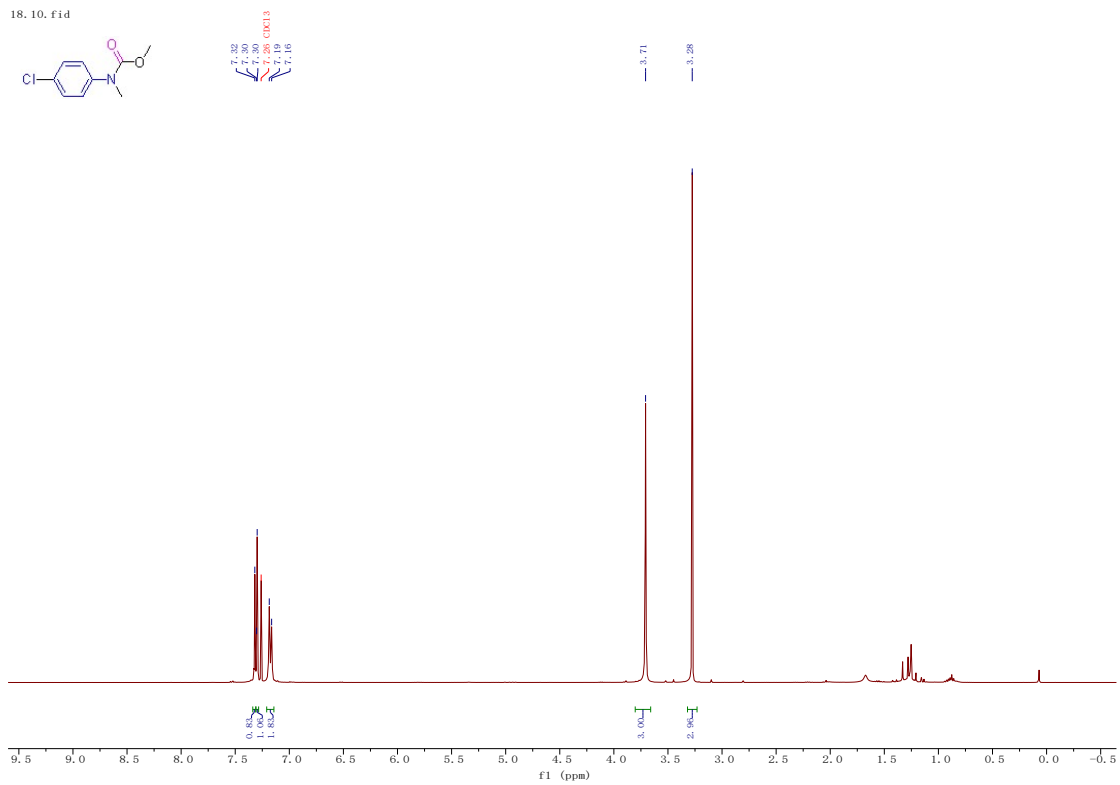

Figure S65 <sup>13</sup>C NMR spectrum for compound 4i

18-C. 10. fid

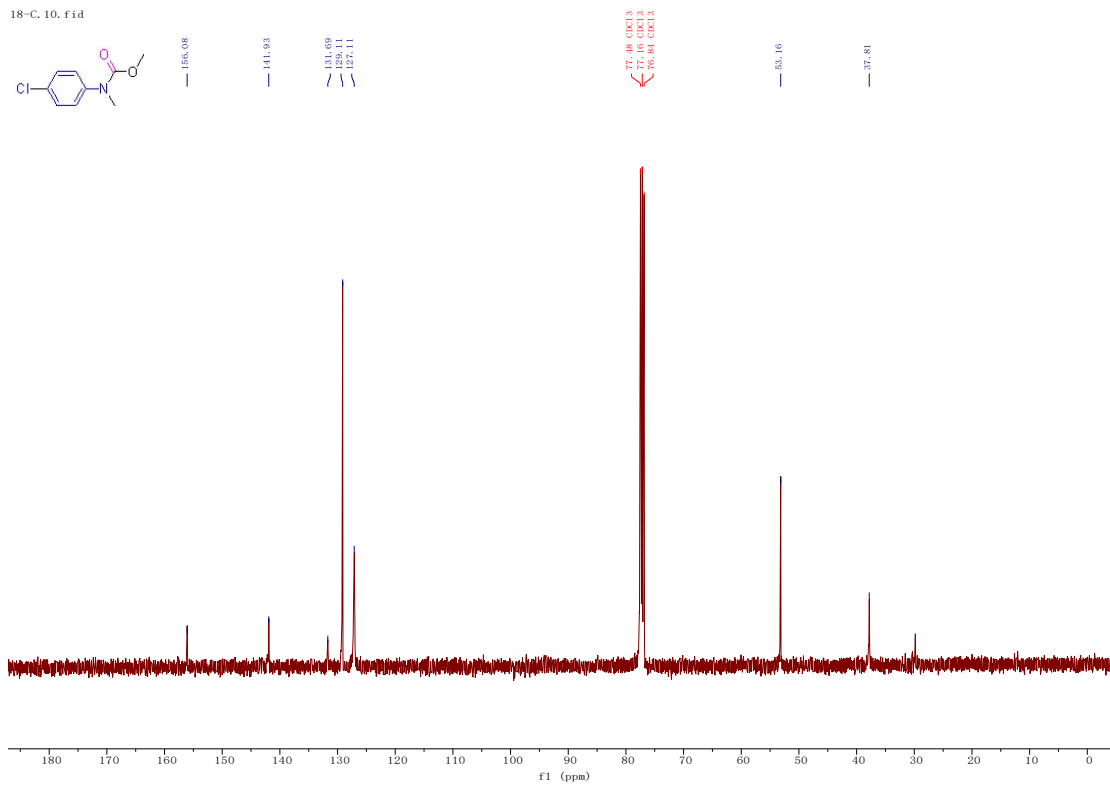

Figure S66 <sup>1</sup>H NMR spectrum for compound 4j

2023-8-18. 239. fid  
20230818-11-H

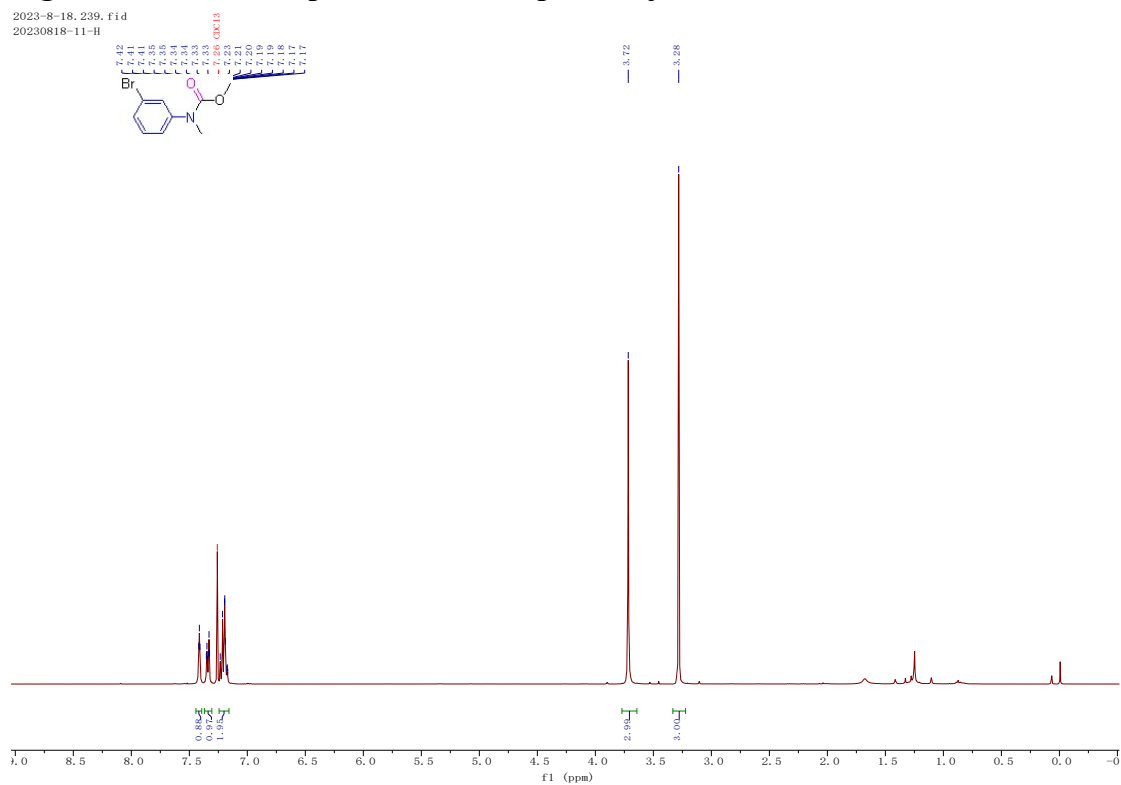

Figure S67 <sup>13</sup>C NMR spectrum for compound 4j

26-C. 10. fid

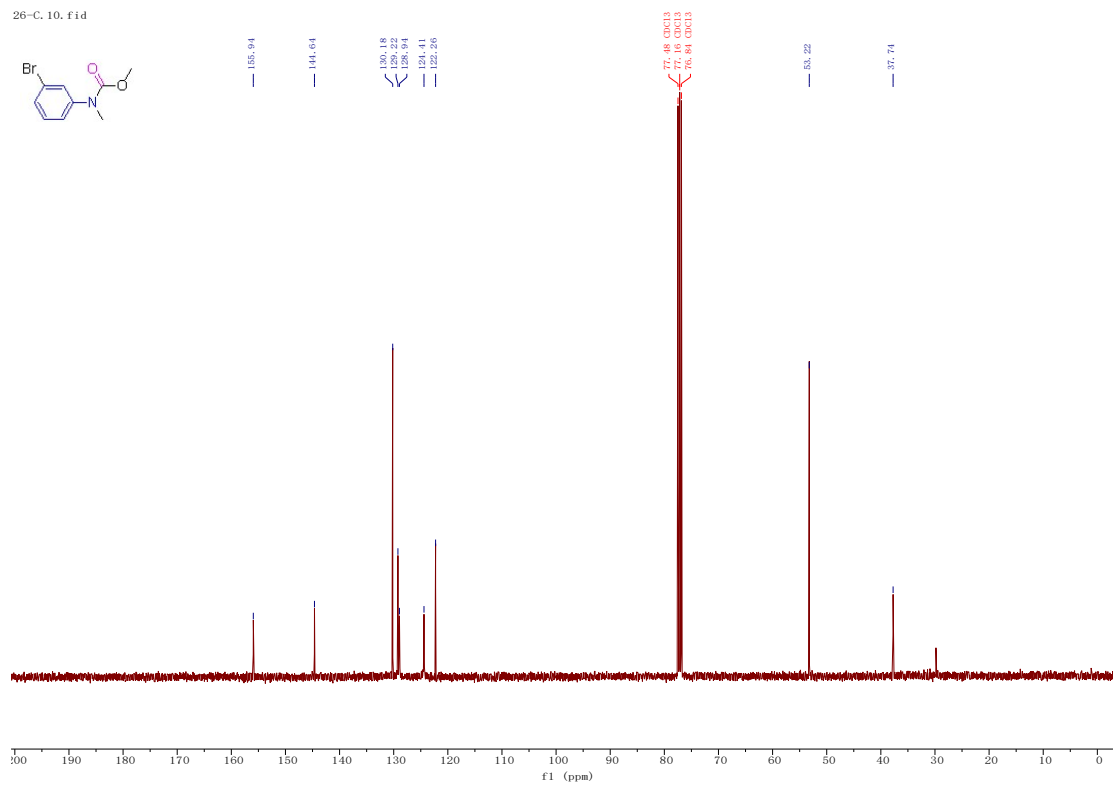

**Figure S68 HRMS spectrum for compound 4j**

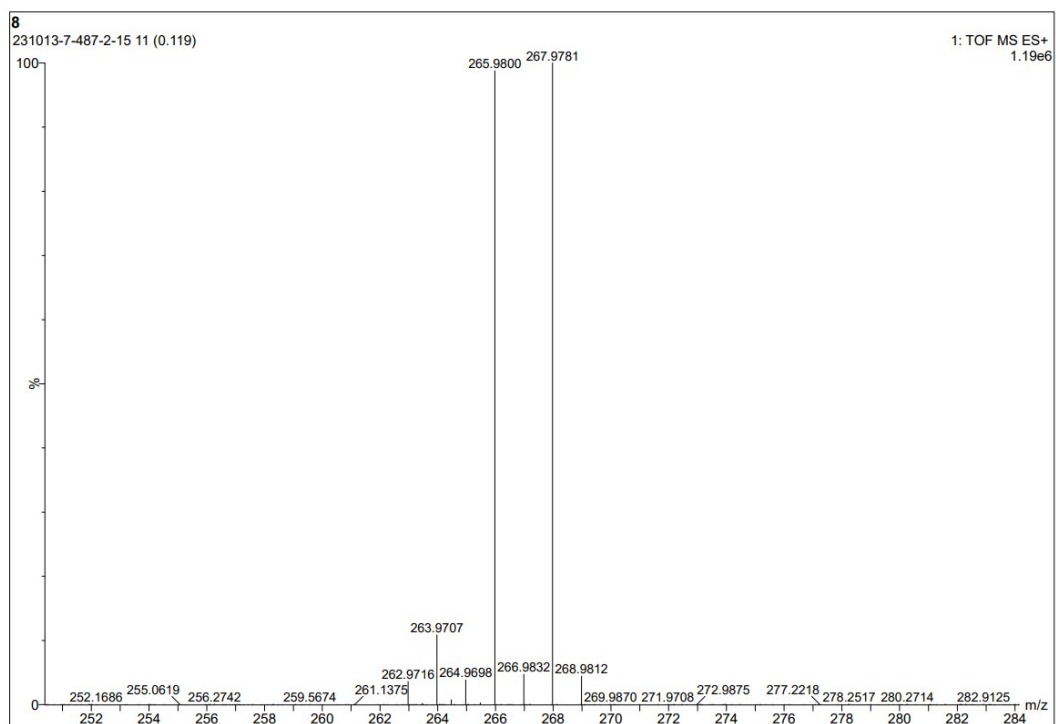

**Figure S69 <sup>1</sup>H NMR spectrum for compound 4k**

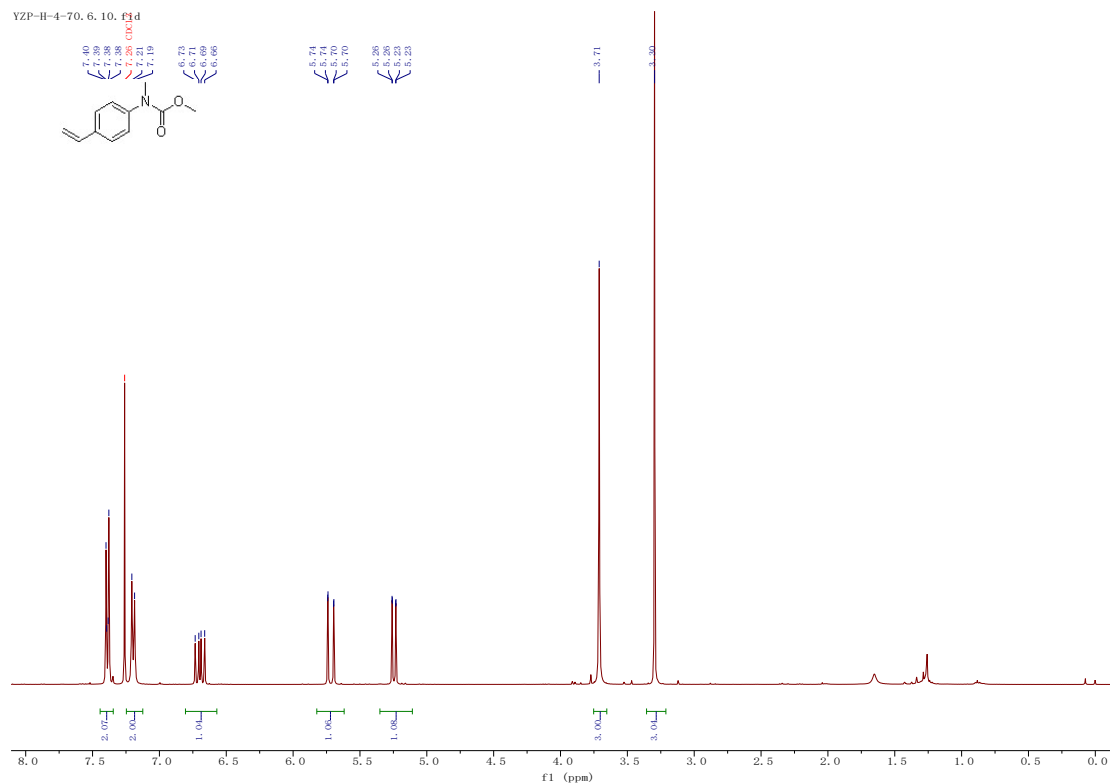

**Figure S70**  $^{13}\text{C}$  NMR spectrum for compound 4k

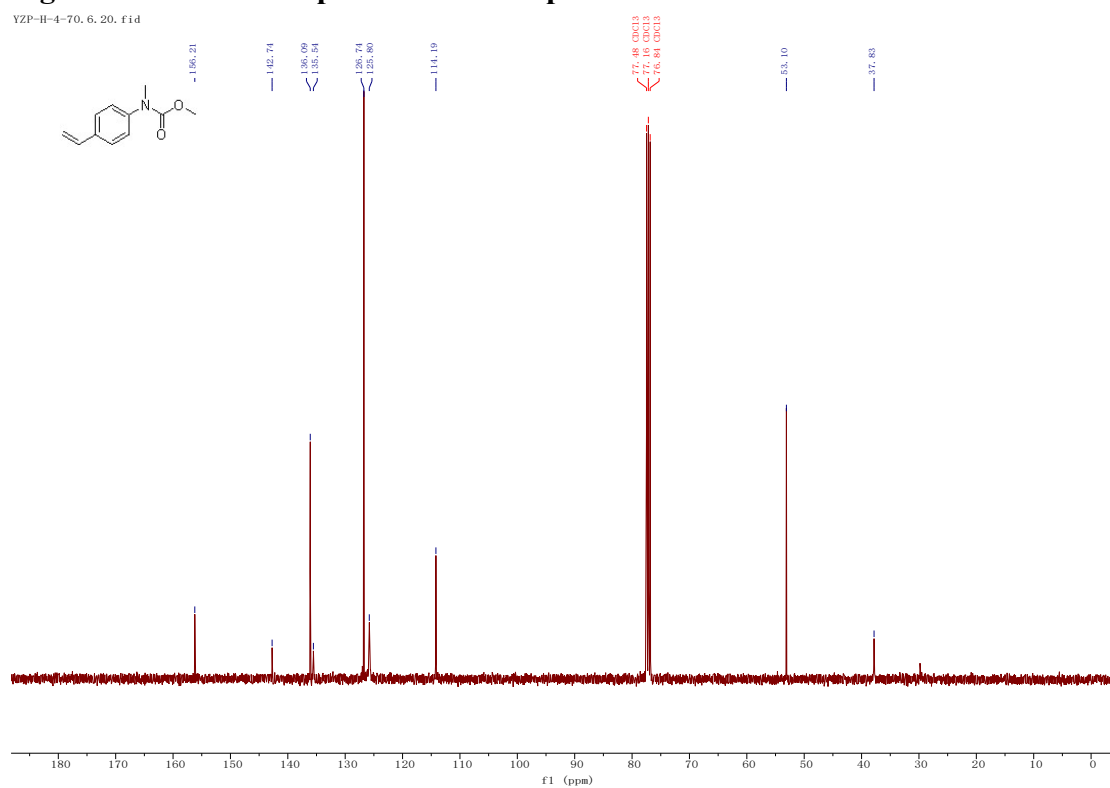



Figure S71 HRMS spectrum for compound 4k

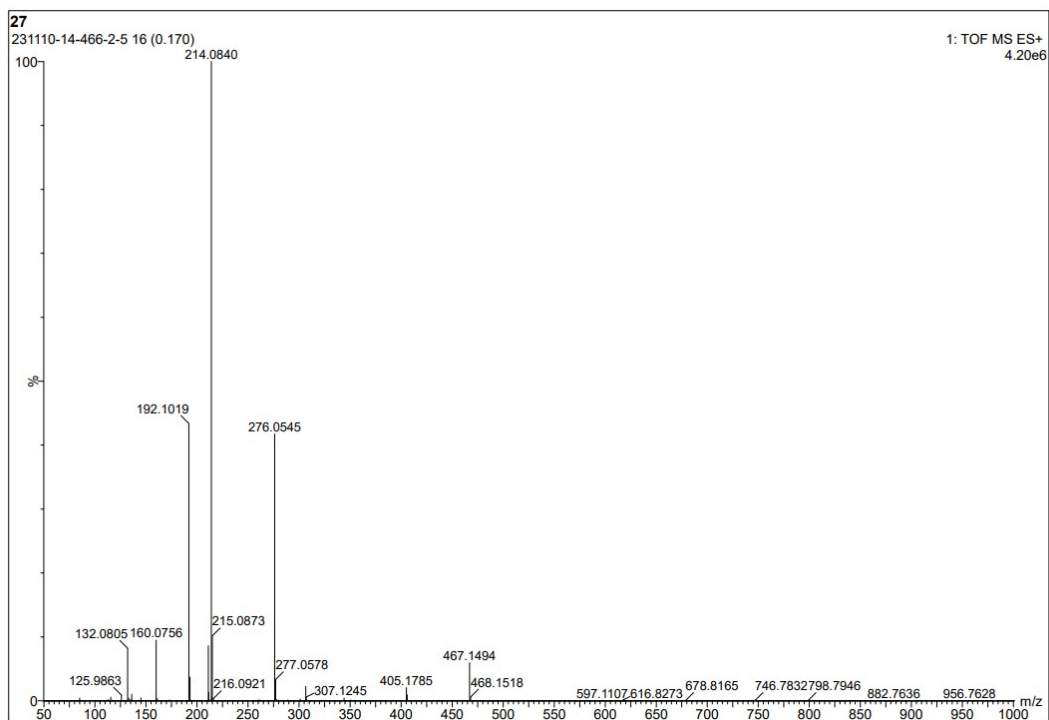

Figure S72 <sup>1</sup>H NMR spectrum for compound 4l

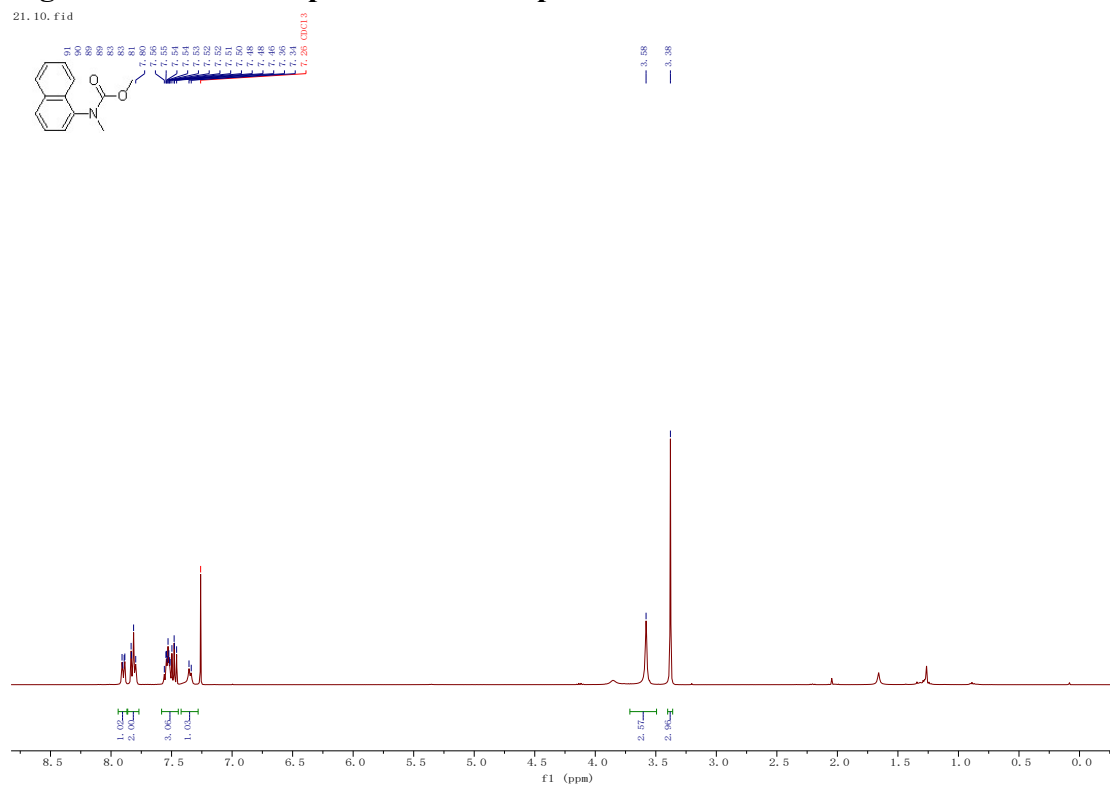

**Figure S73**  $^{13}\text{C}$  NMR spectrum for compound 4l

21-C\_10.fid

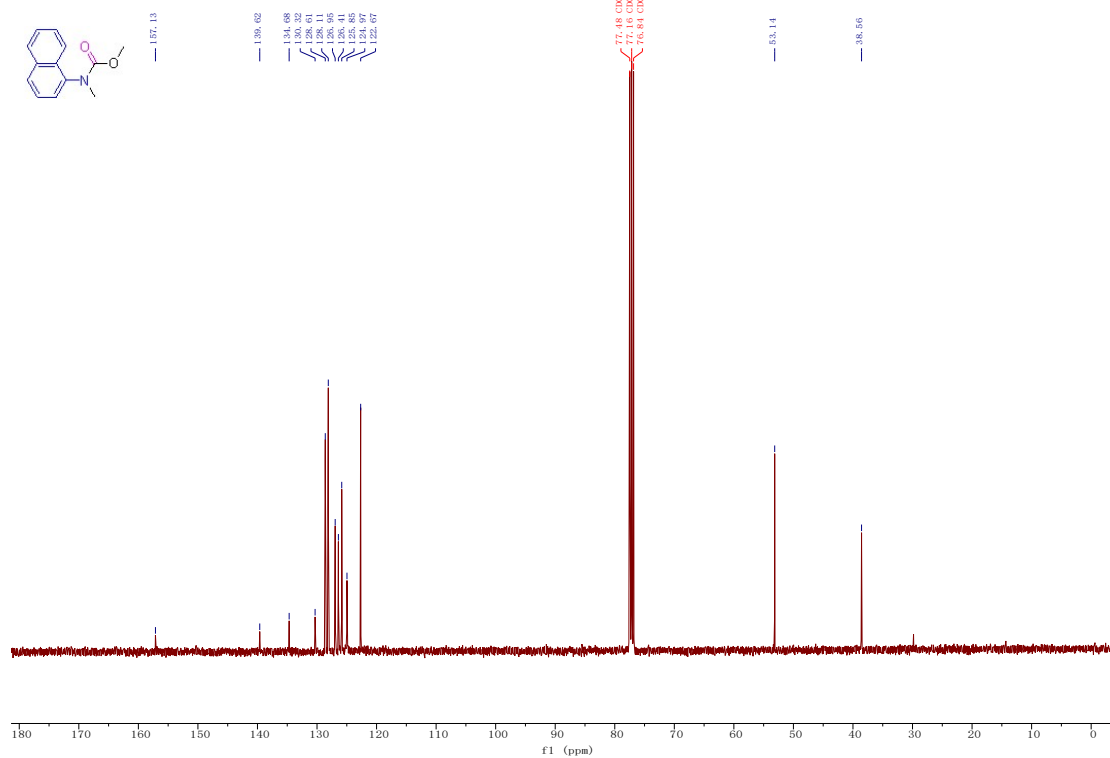

**Figure S74** HRMS spectrum for compound 4l

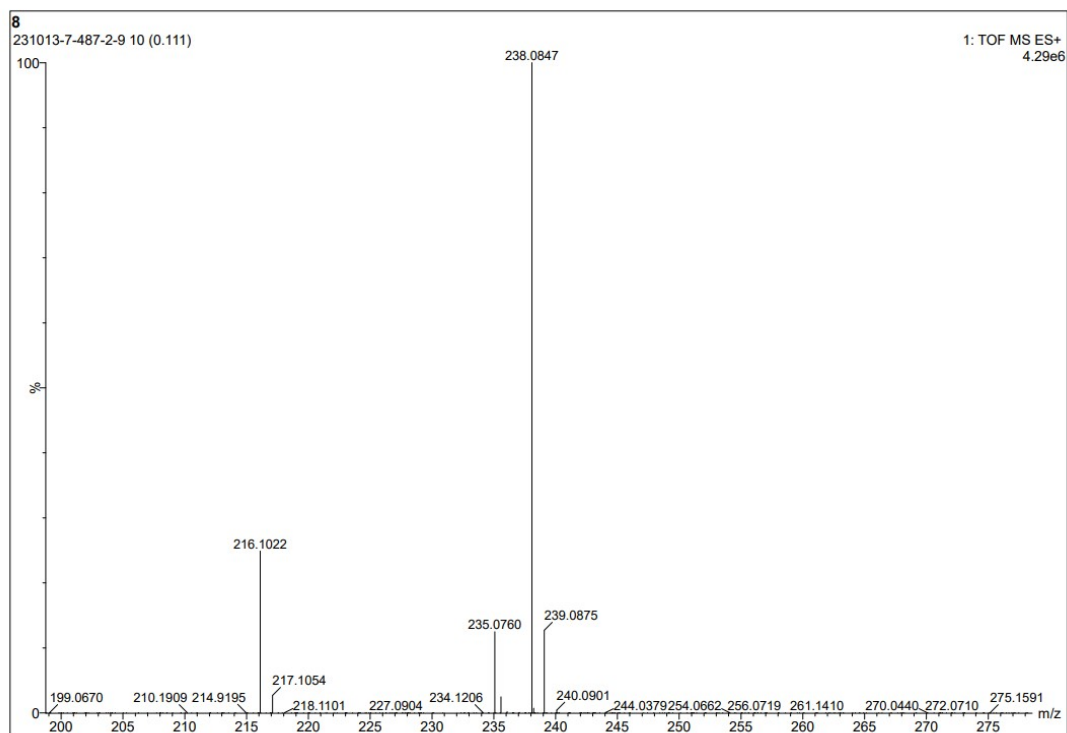

**Figure S75**  $^1\text{H}$  NMR spectrum for compound 4m

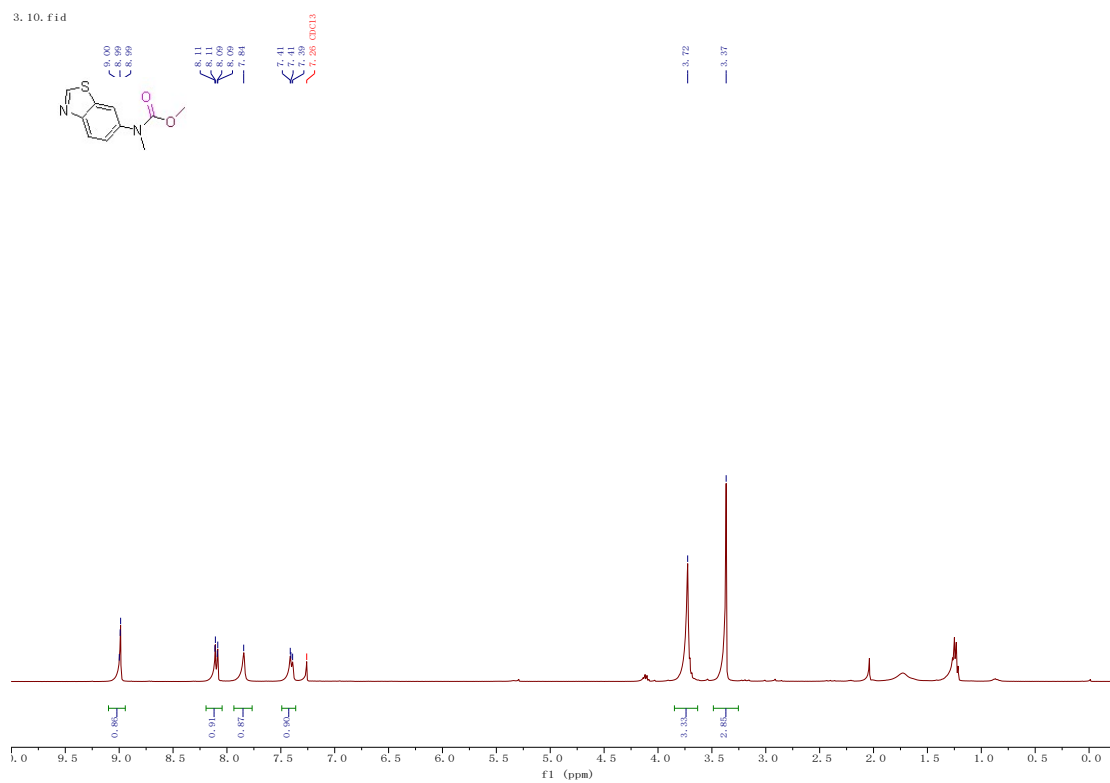

**Figure S76**  $^{13}\text{C}$  NMR spectrum for compound 4m

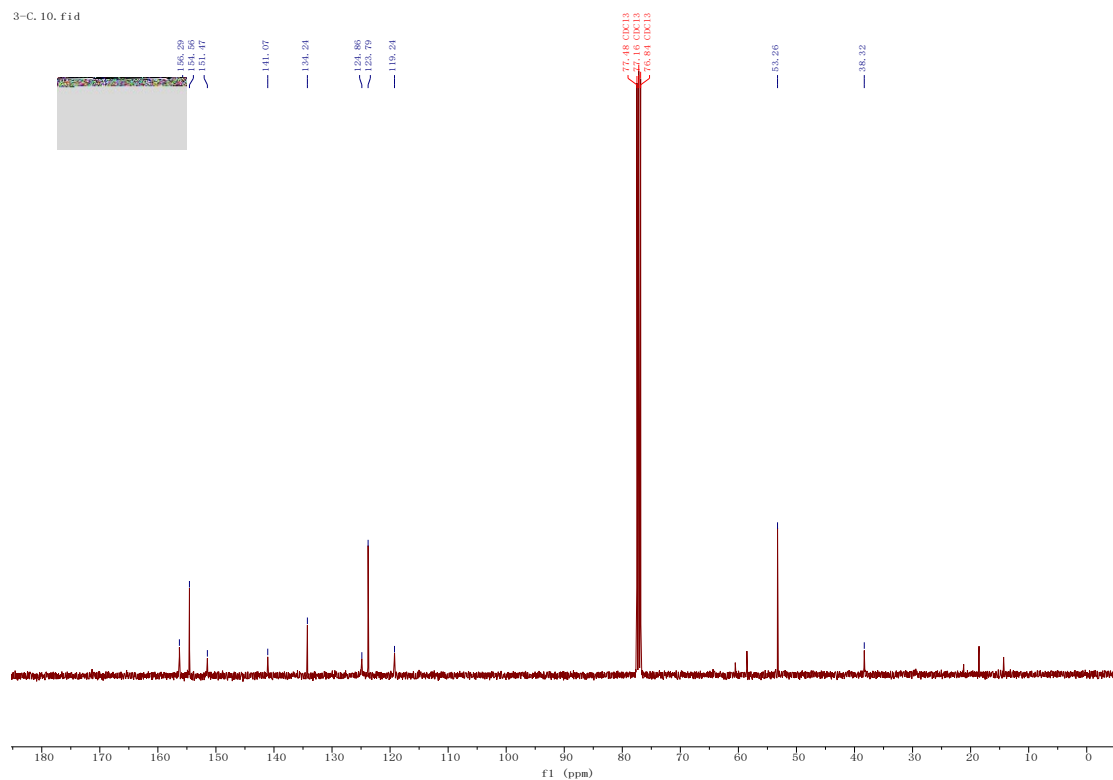

**Figure S77 HRMS spectrum for compound 4m**

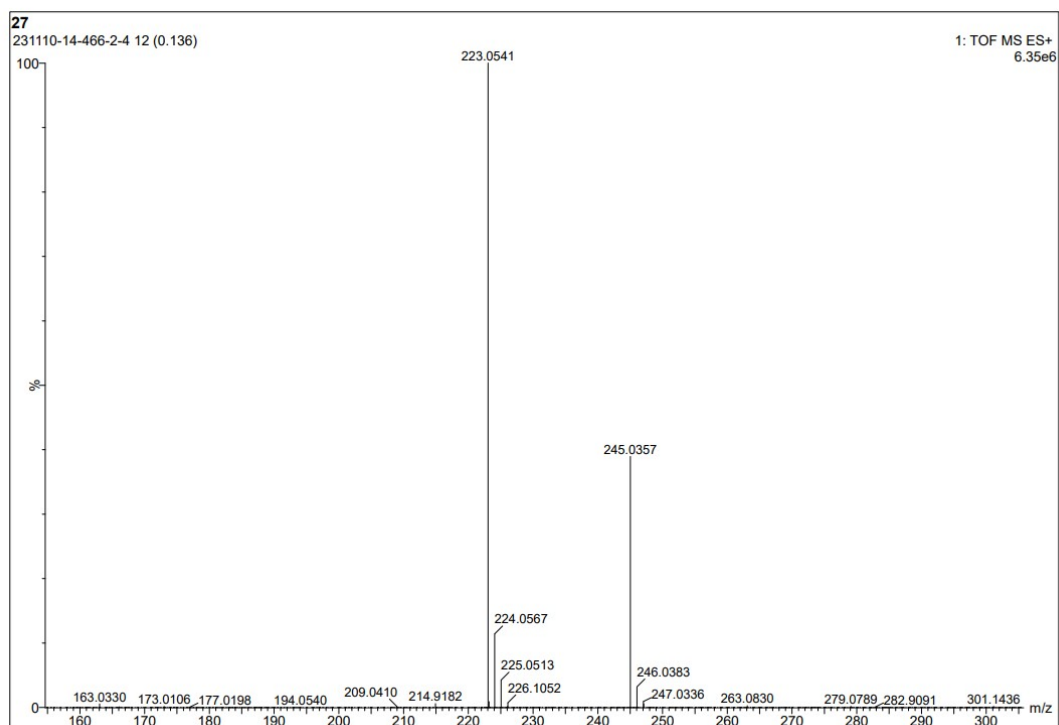

Figure S78 <sup>1</sup>H NMR spectrum for compound 4p

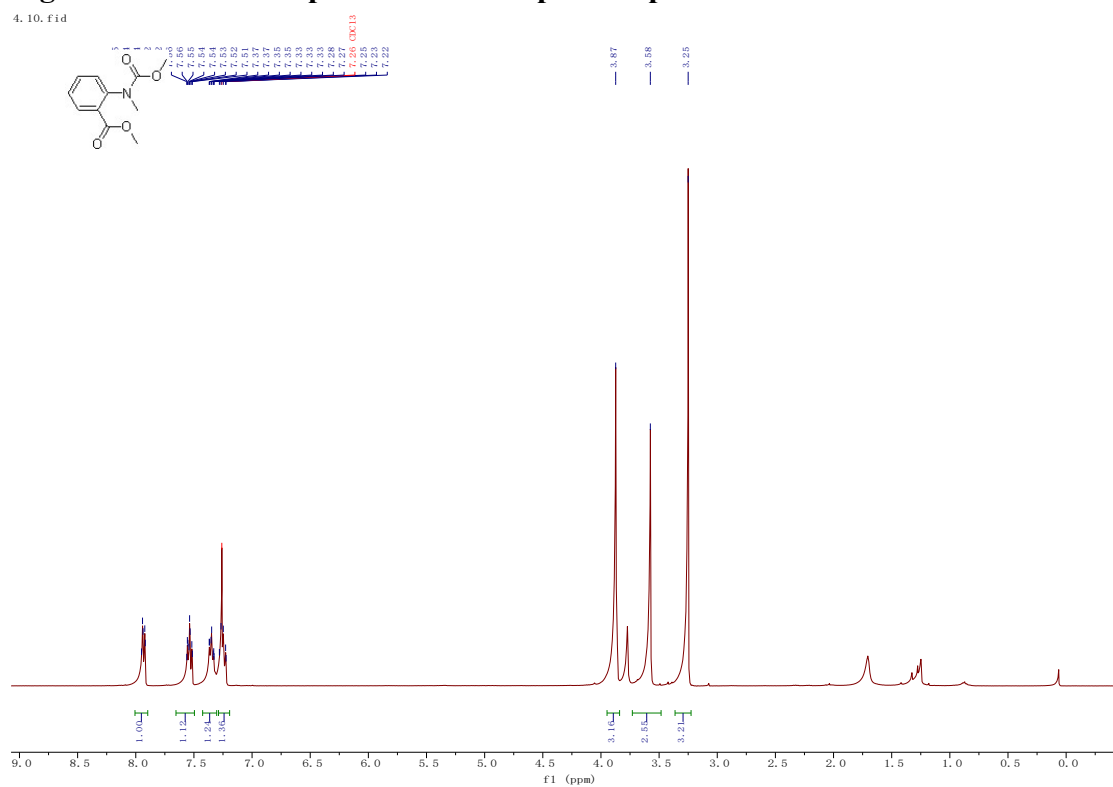

Figure S79 <sup>13</sup>C NMR spectrum for compound 4p

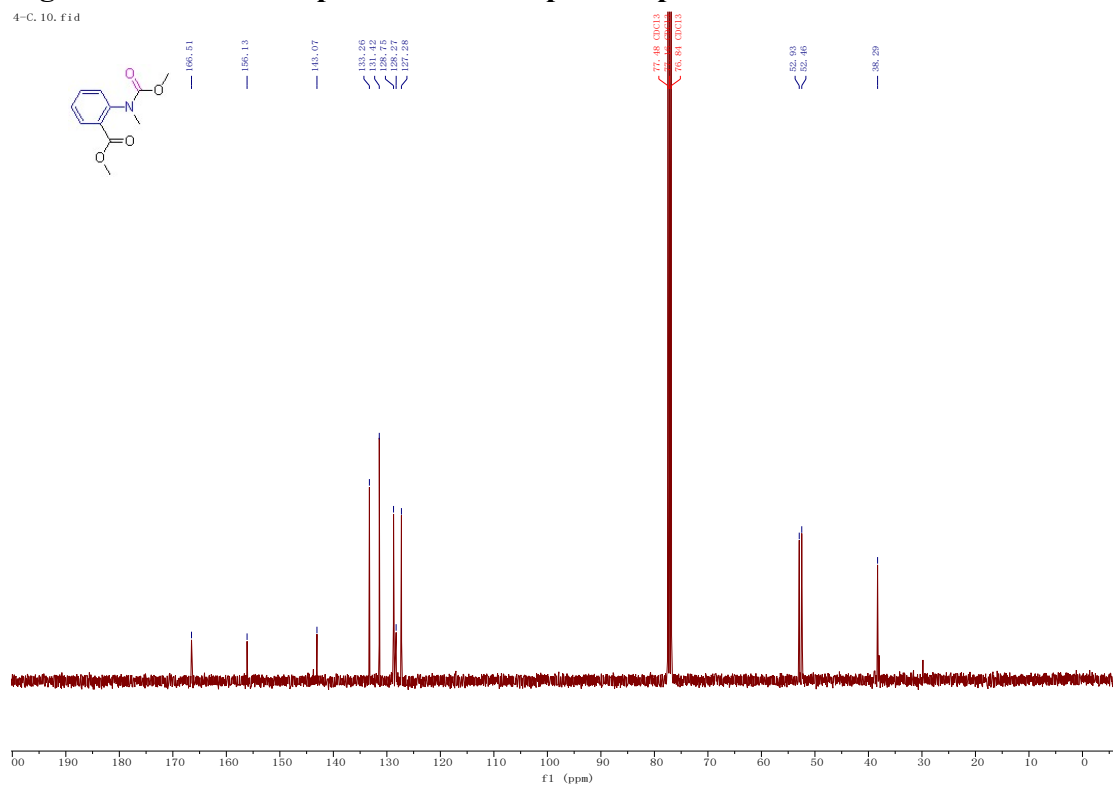

**Figure S80 HRMS spectrum for compound 4p**

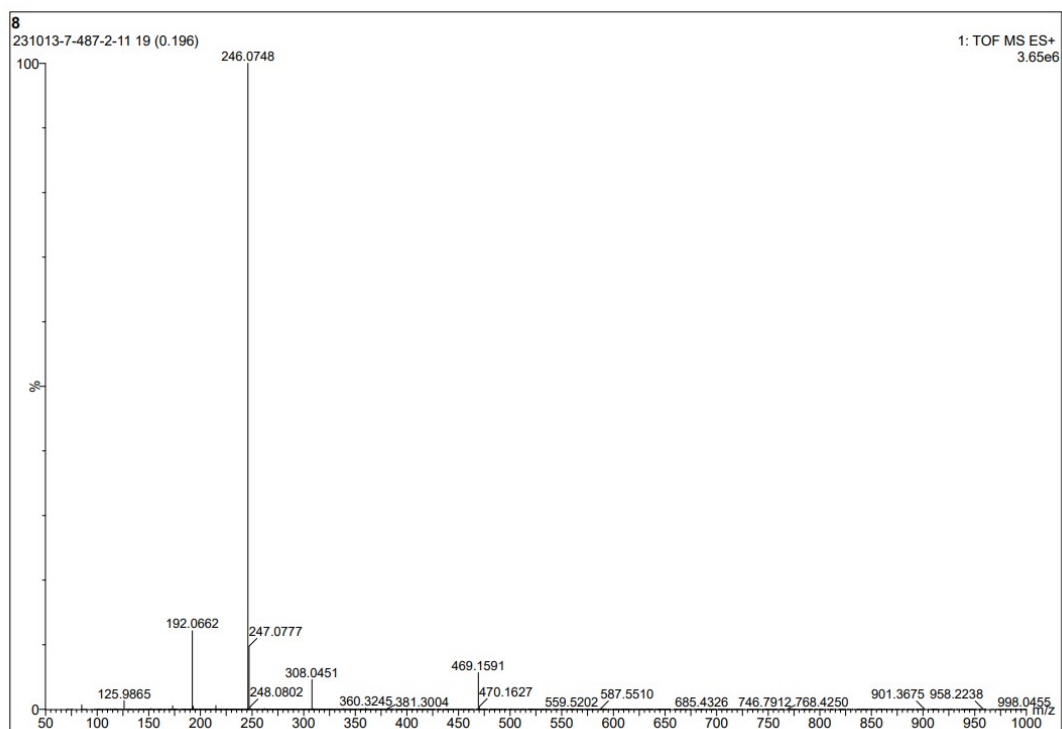

**Figure S81 <sup>1</sup>H NMR spectrum for compound 4q**

2023-10-11-11.2572.fid  
202301011-7-H

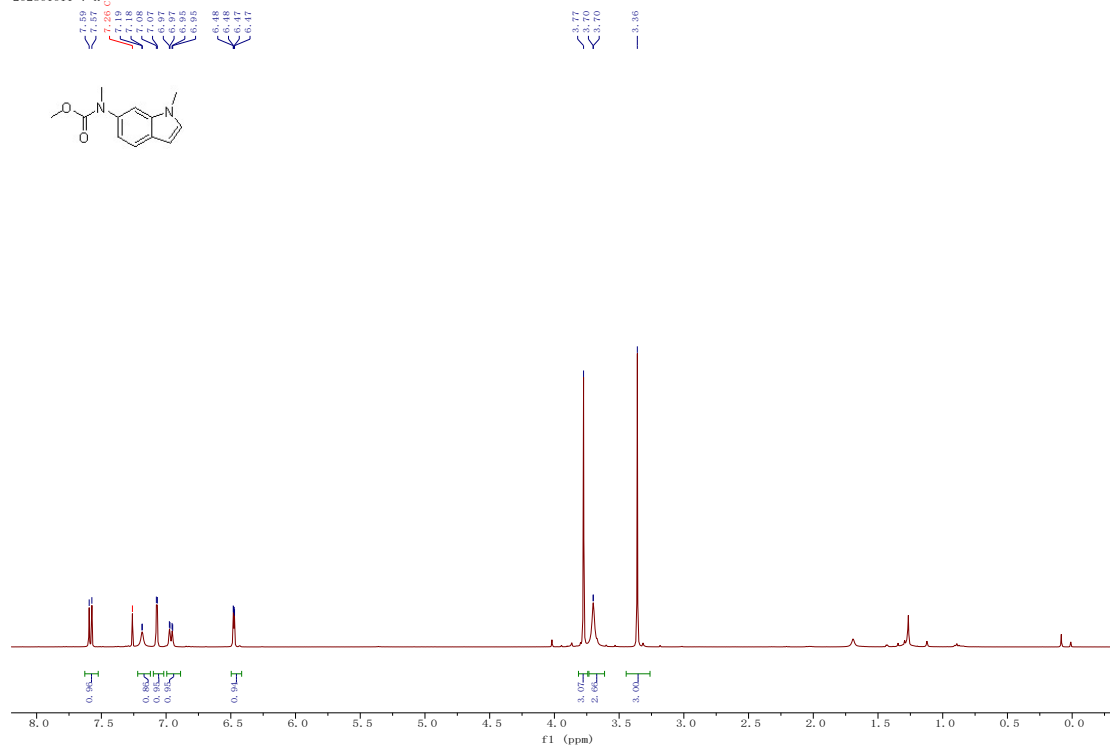

**Figure S82** <sup>13</sup>C NMR spectrum for compound 4q

YZP-C-12-70.10.10.fid

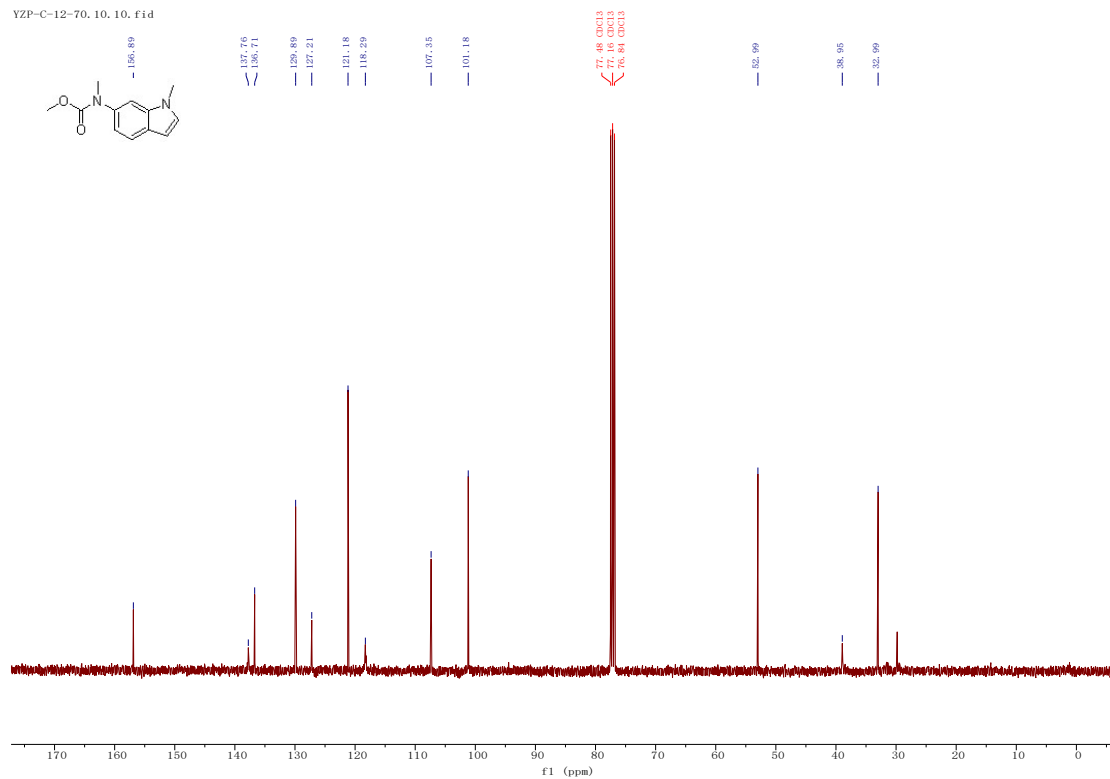

Figure S83 HRMS spectrum for compound 4q and 4r

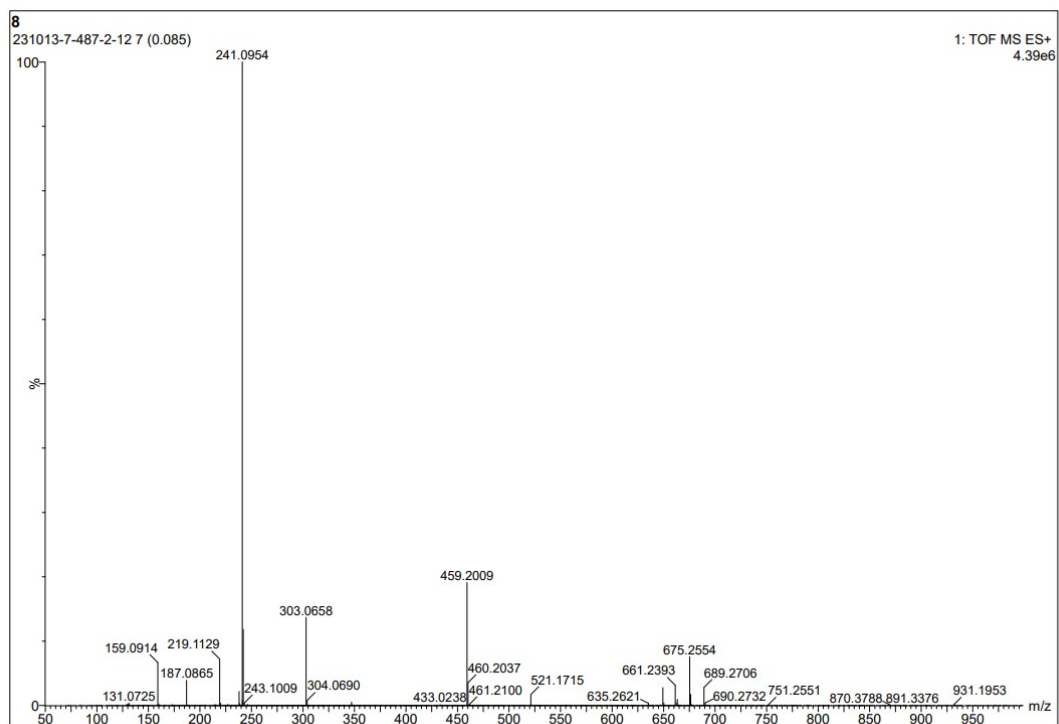

Figure S84 <sup>1</sup>H NMR spectrum for compound 4r

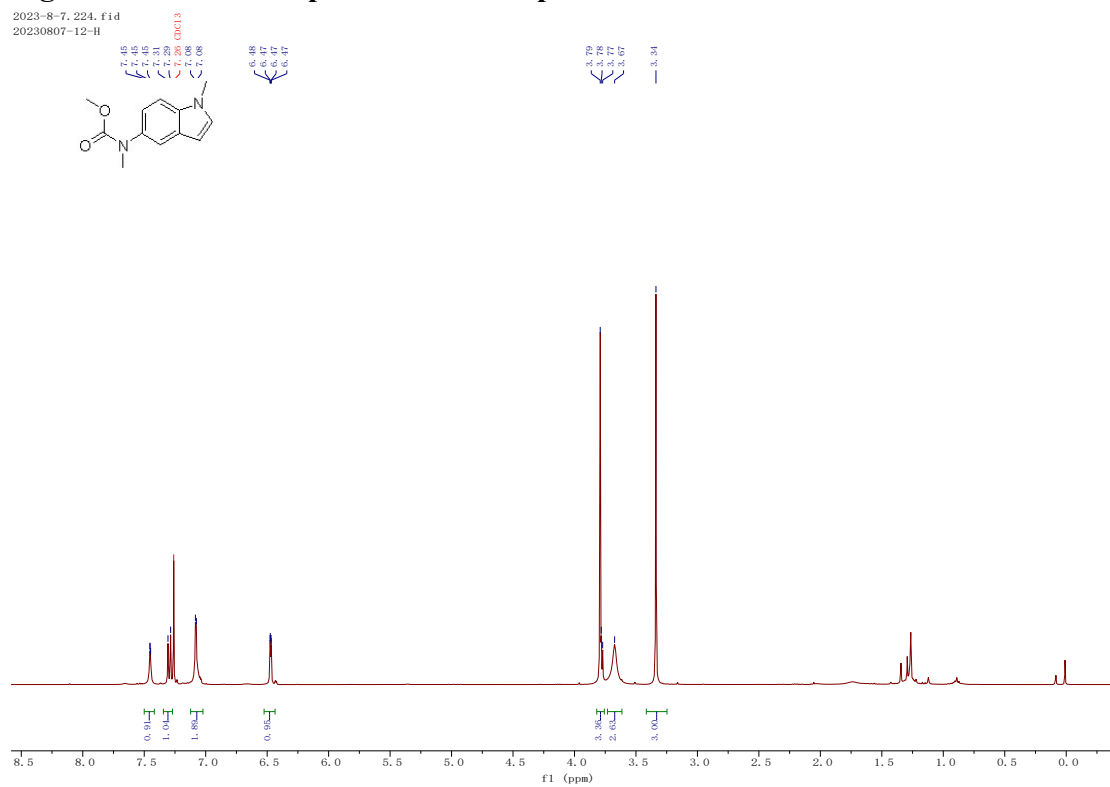



**Figure S85 <sup>13</sup>C NMR spectrum for compound 4r**

60\_24-C\_10.fid

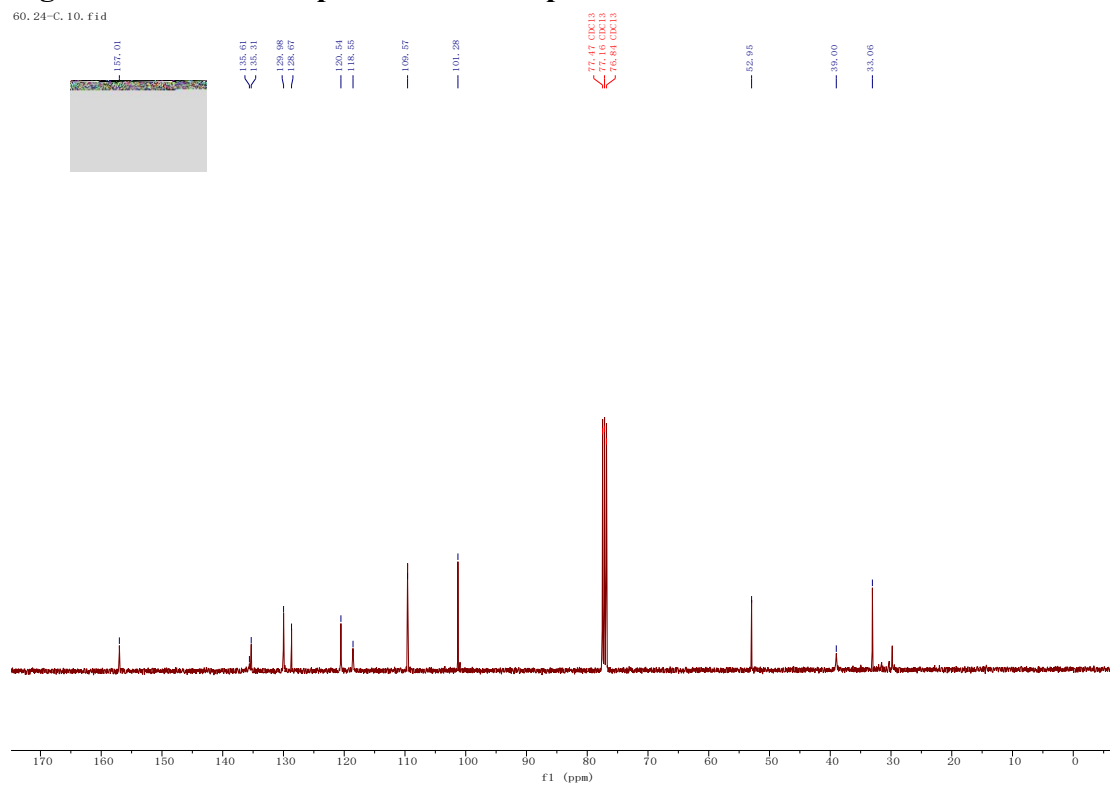

**Figure S86 <sup>1</sup>H NMR spectrum for compound 4 r'**

2023-8-7\_225.fid  
20230807-13-H

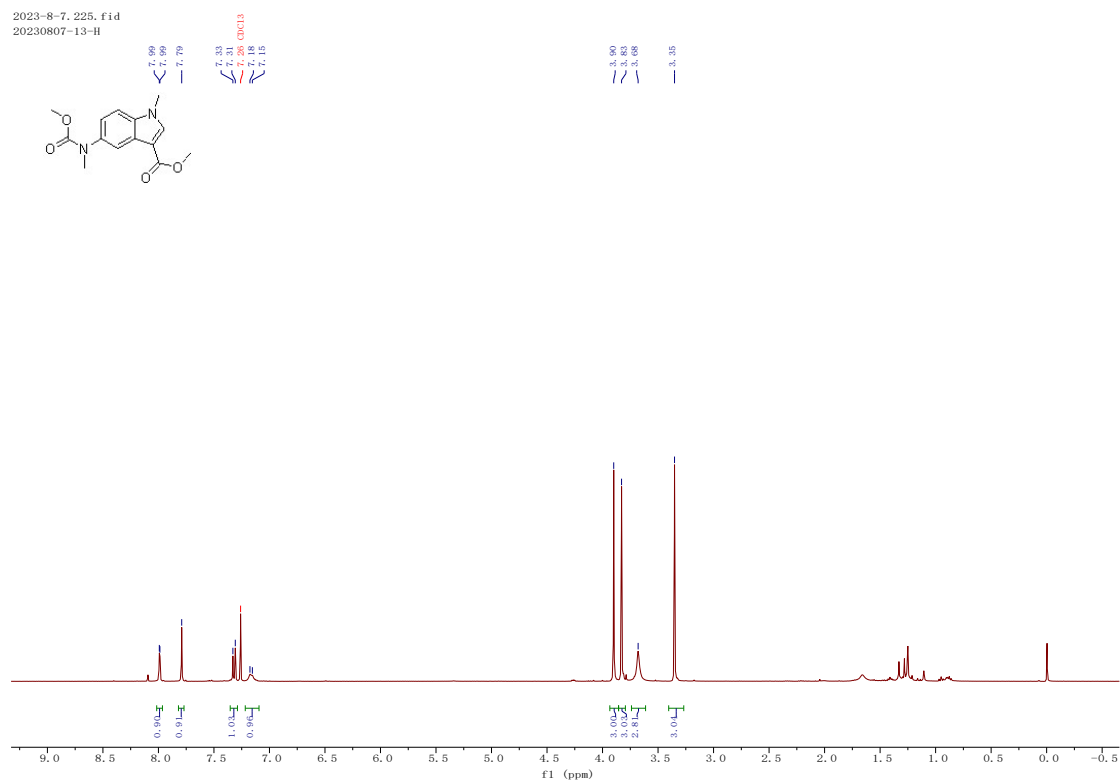

Figure S87 <sup>13</sup>C NMR spectrum for compound 4 r'

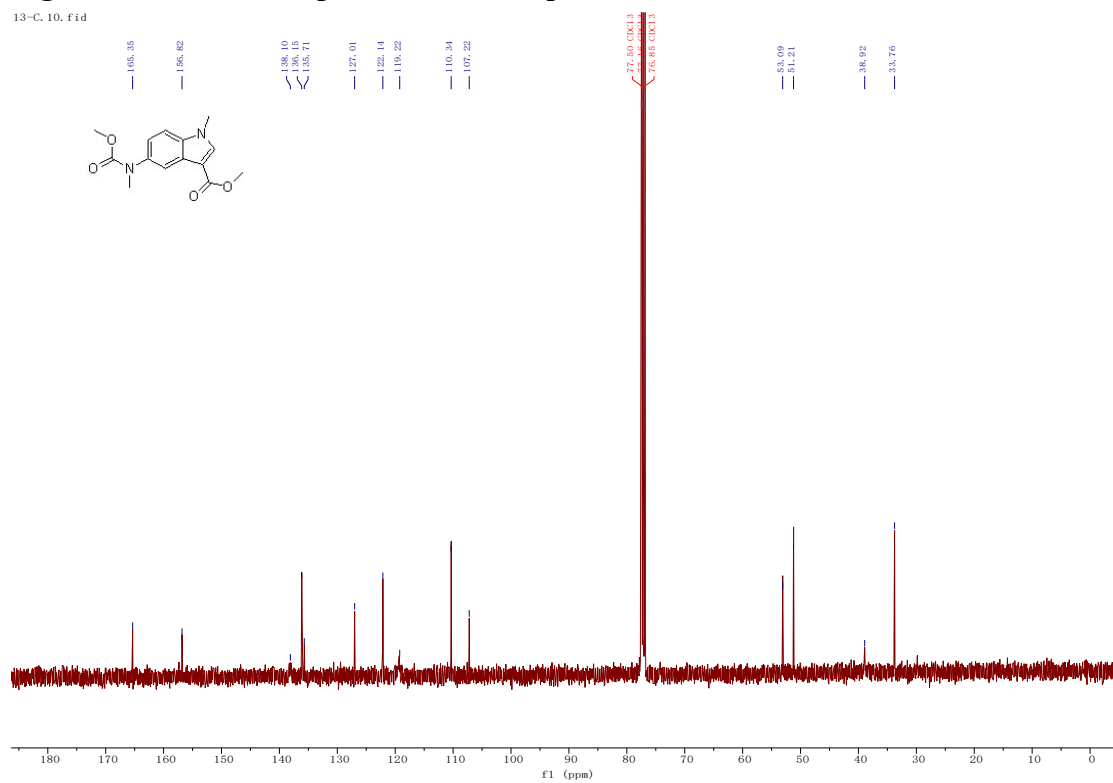

Figure S88 HRMS spectrum for compound 4 r'

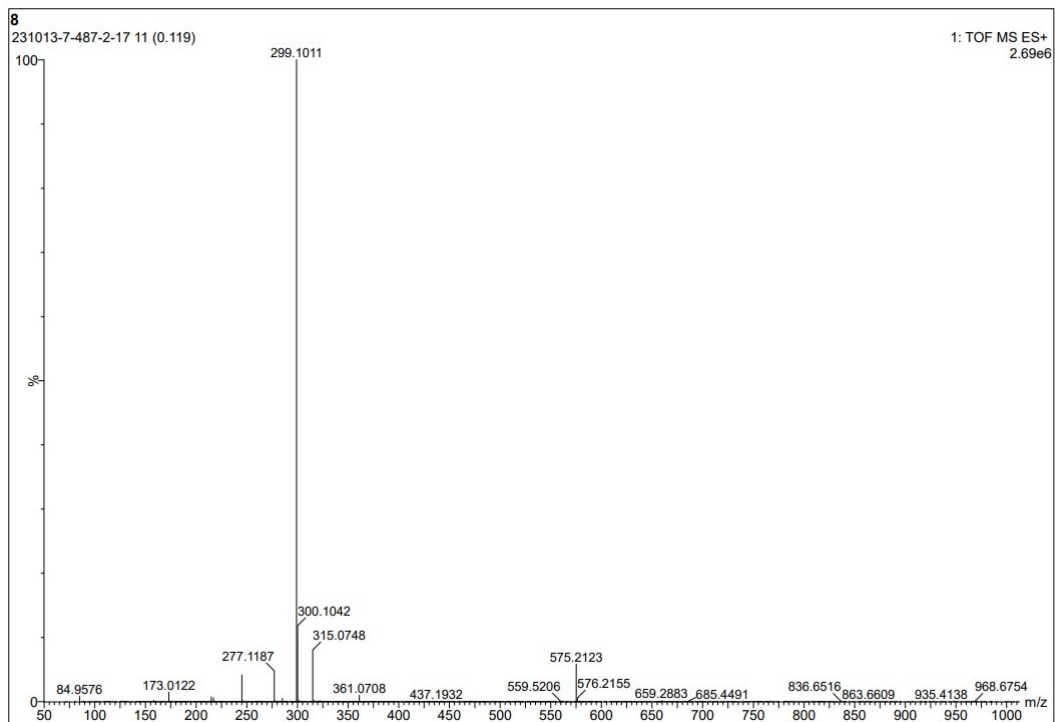

**Figure S89  $^1\text{H}$  NMR spectrum for compound 6a**

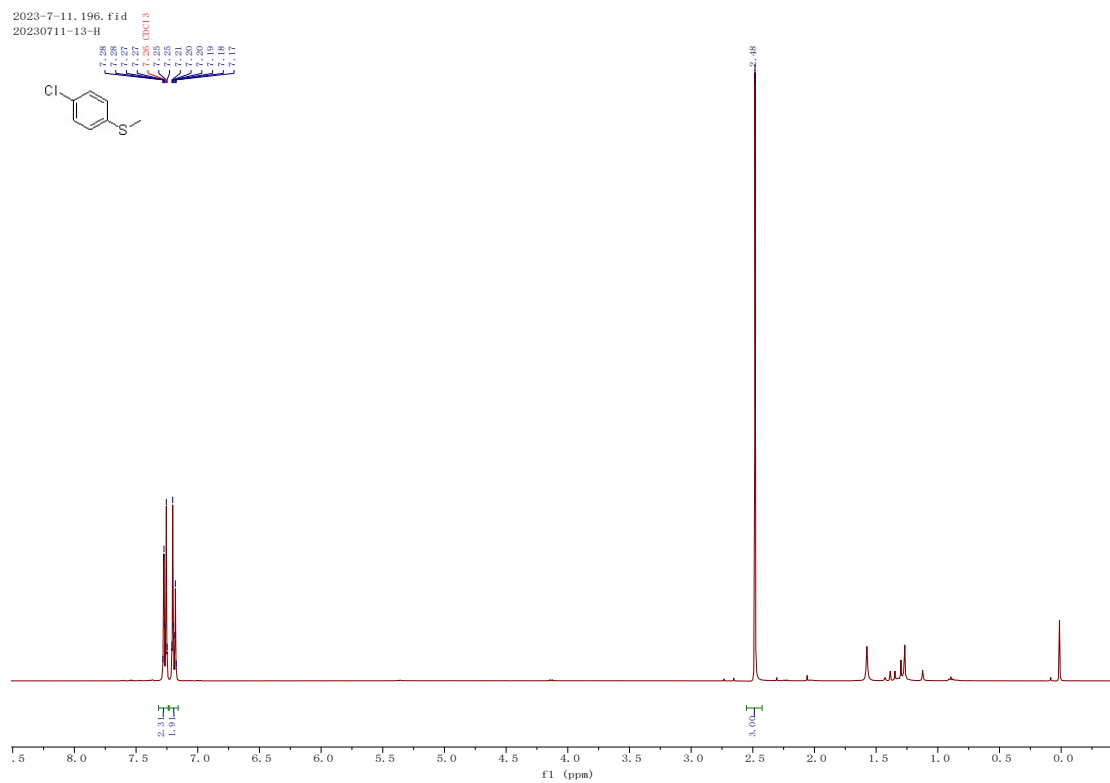

Figure S90 <sup>13</sup>C NMR spectrum for compound 6a

6\_10.fid

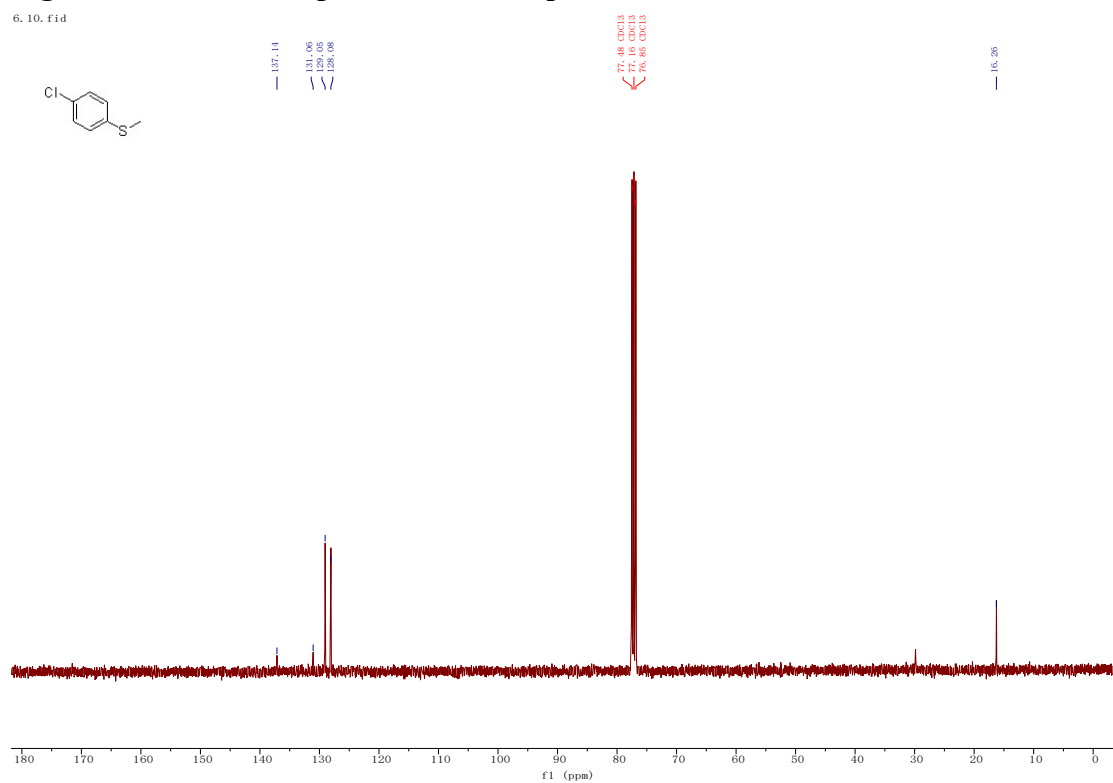

Supplement: d3cc06257k1.pdf [file d3cc06257k1.pdf]
